# Supplementary material for: Screening of herbal extracts for TLR2- and TLR4-dependent anti-inflammatory effects
Source: PubMed Central journal article supplement (PMC6181297; doi:10.1371/journal.pone.0203907), 2018-10-11

HeLa-TLR4  
THP-1

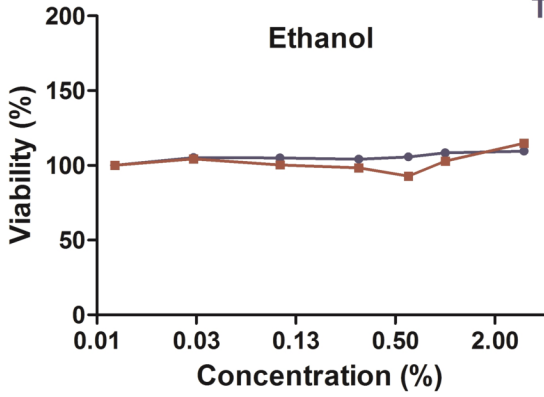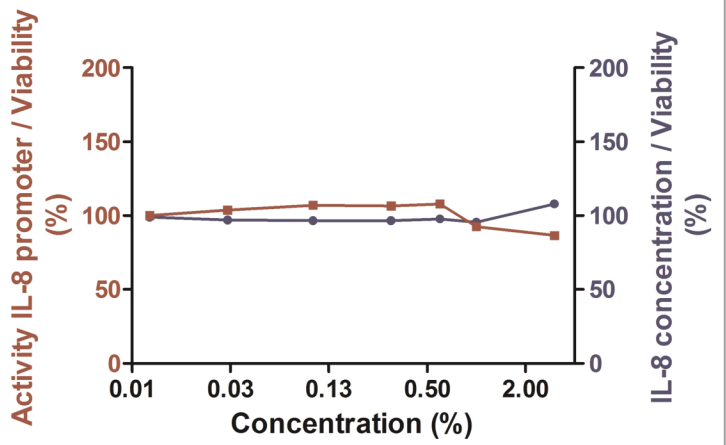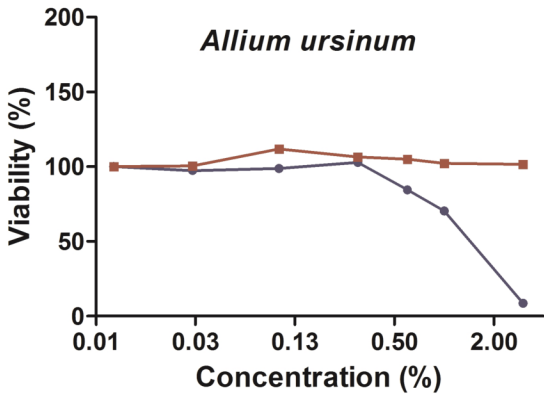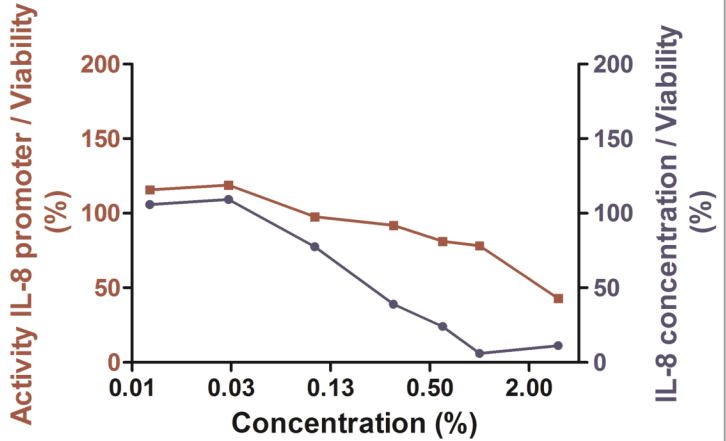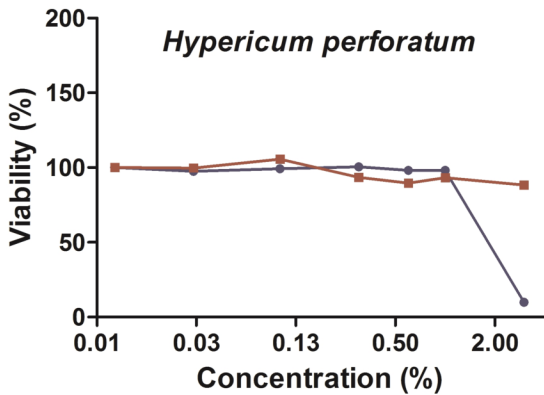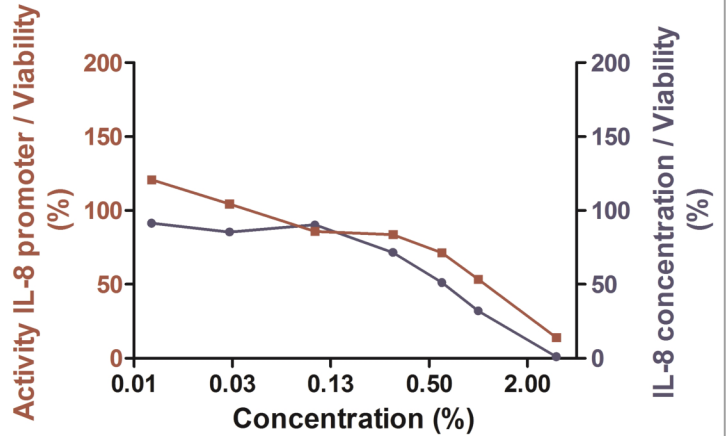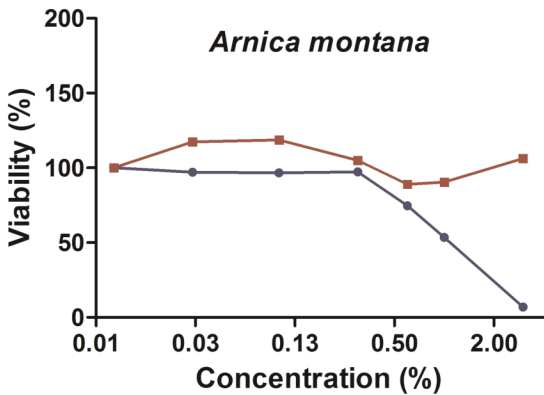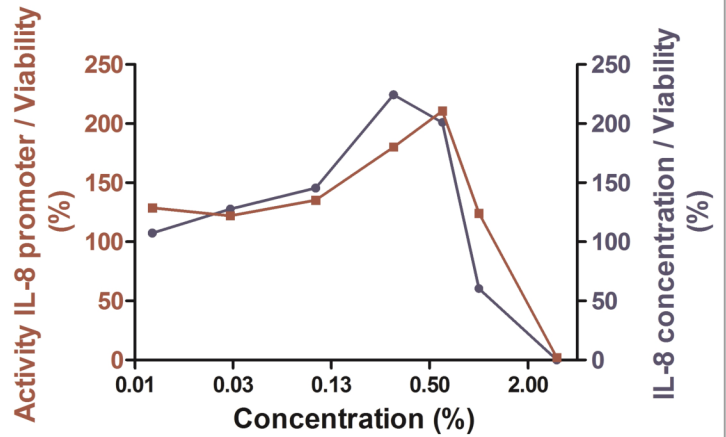

HeLa-TLR4  
THP-1

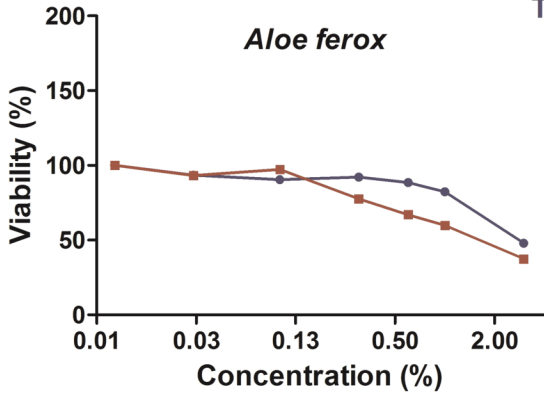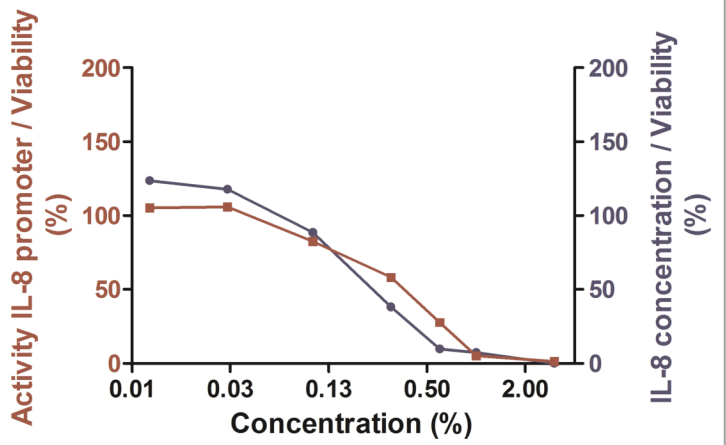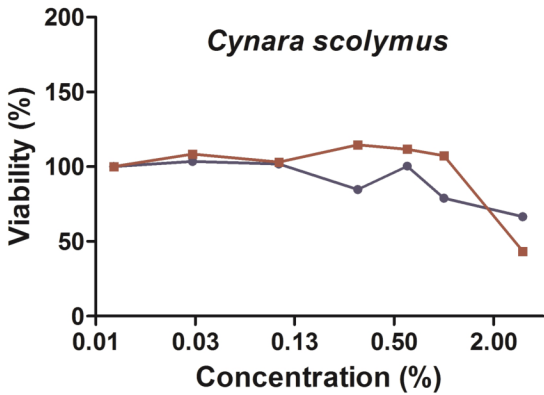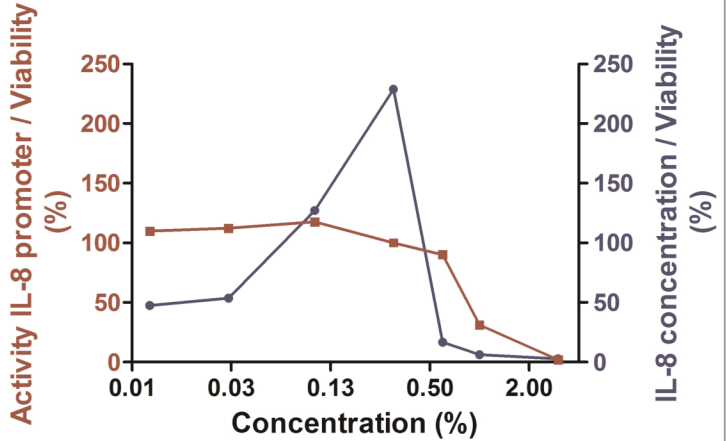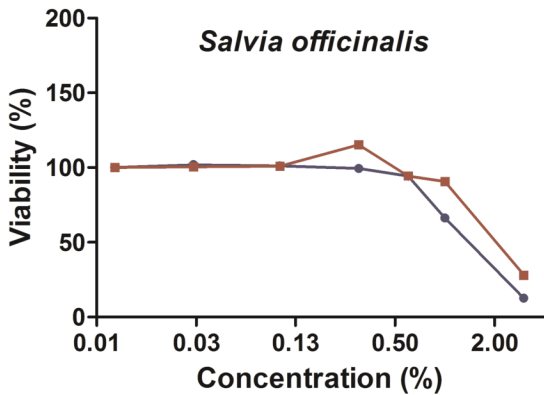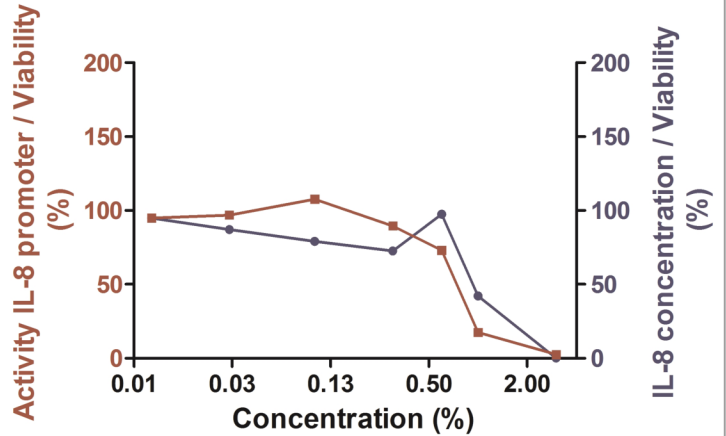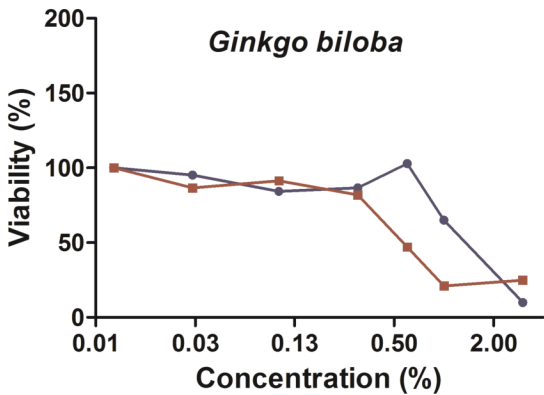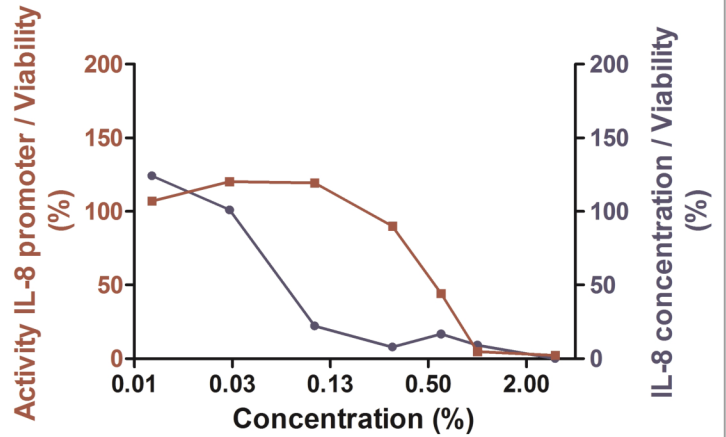

HeLa-TLR4  
THP-1

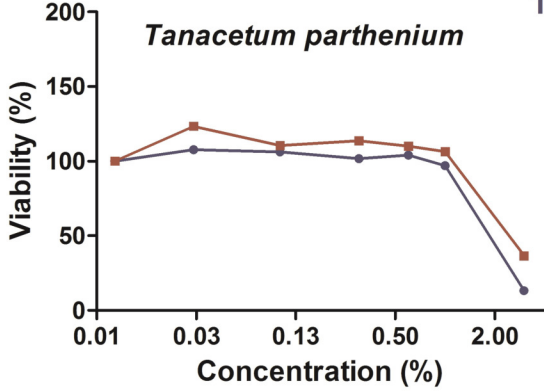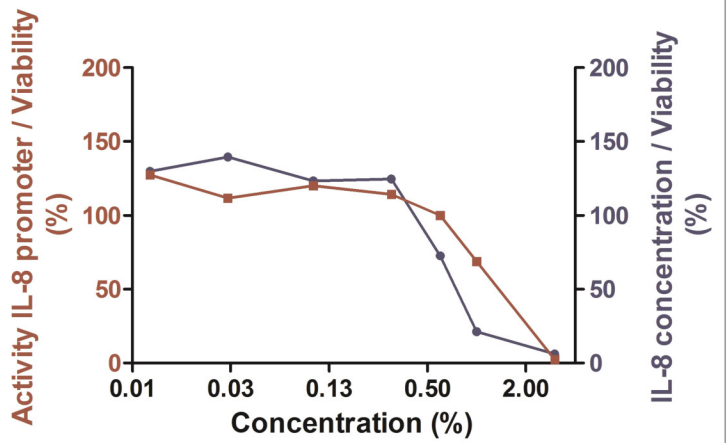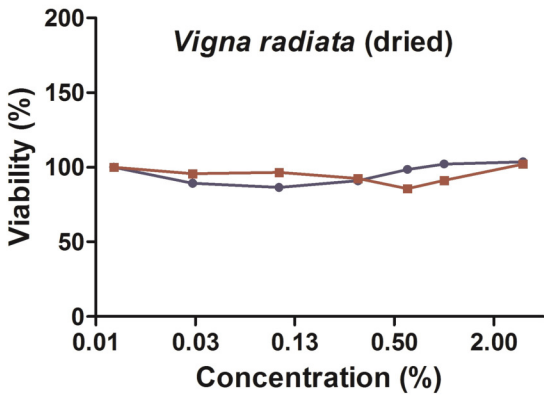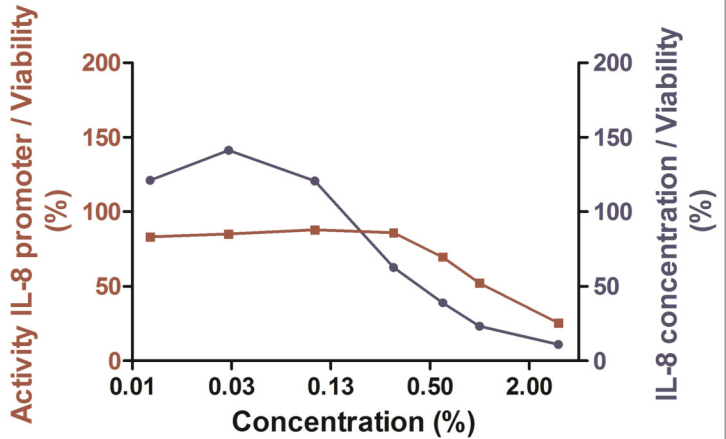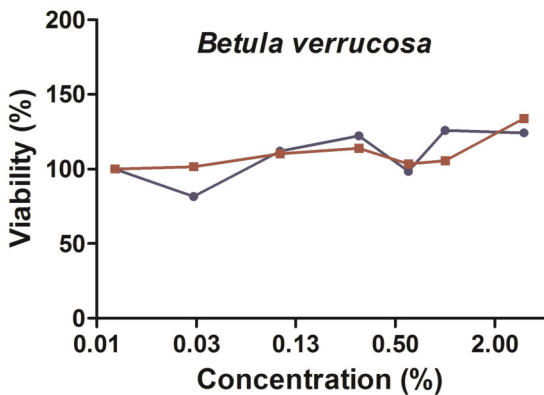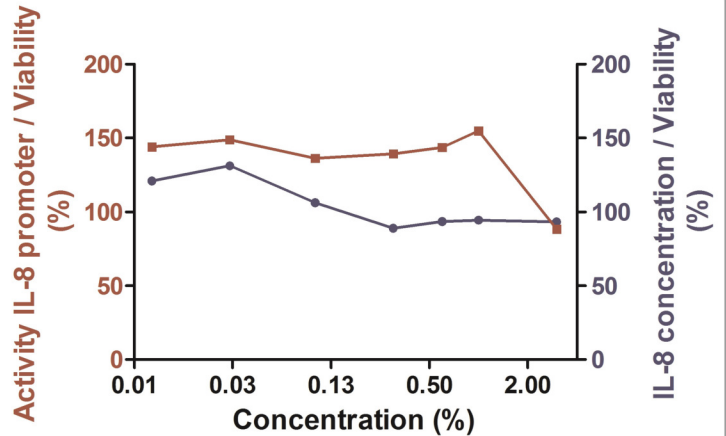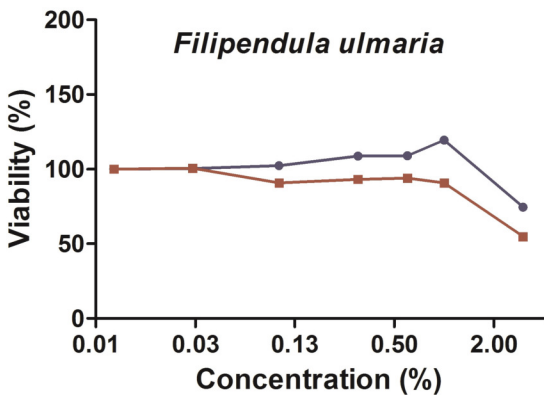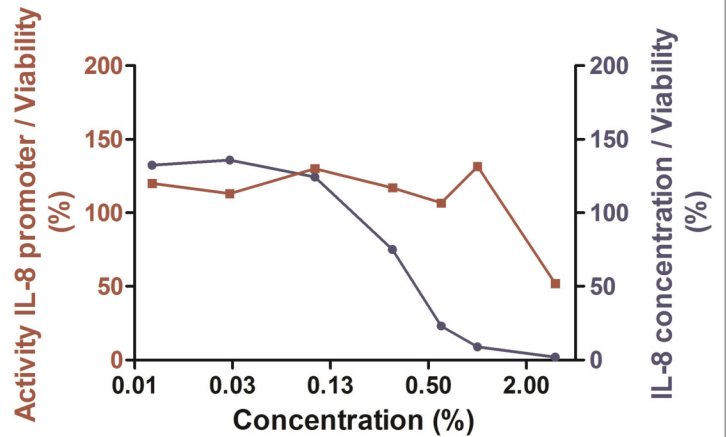

HeLa-TLR4  
THP-1

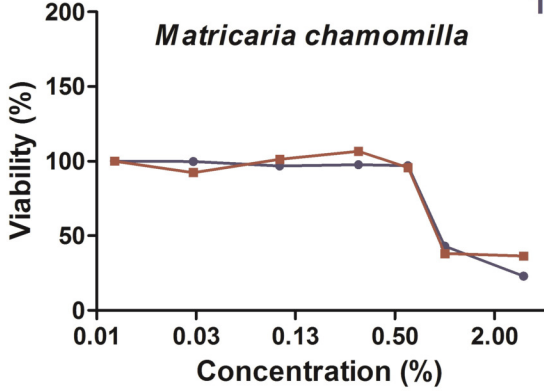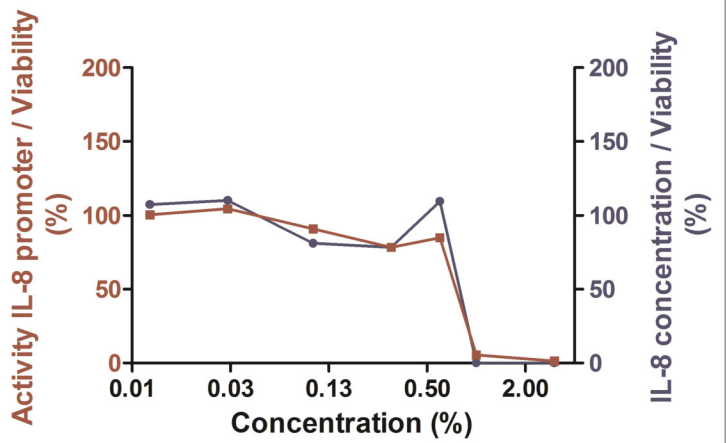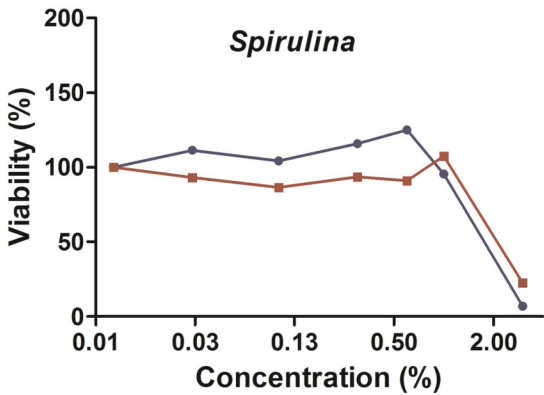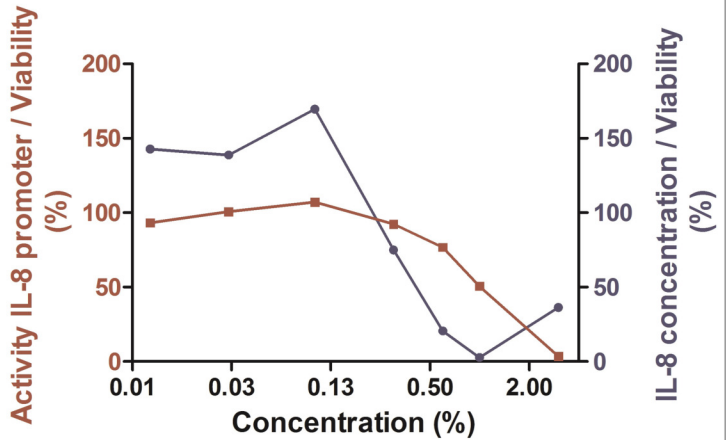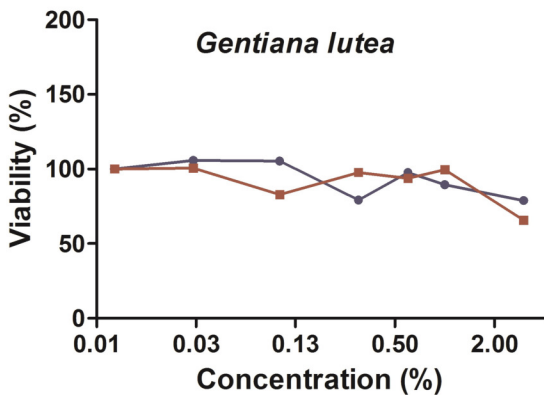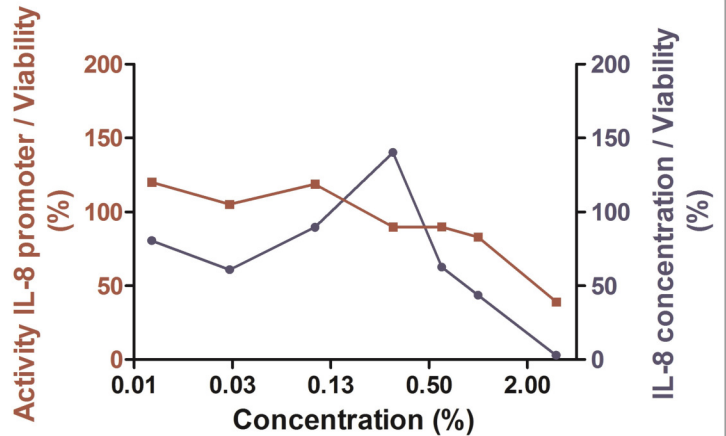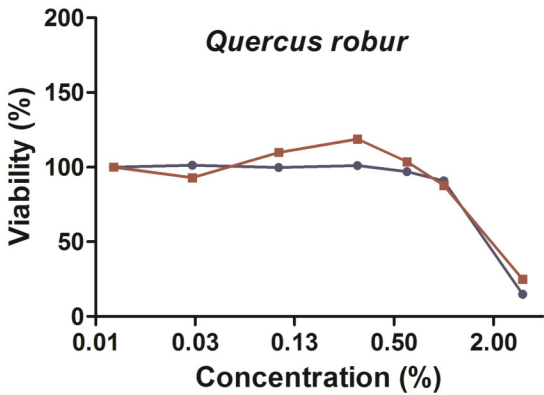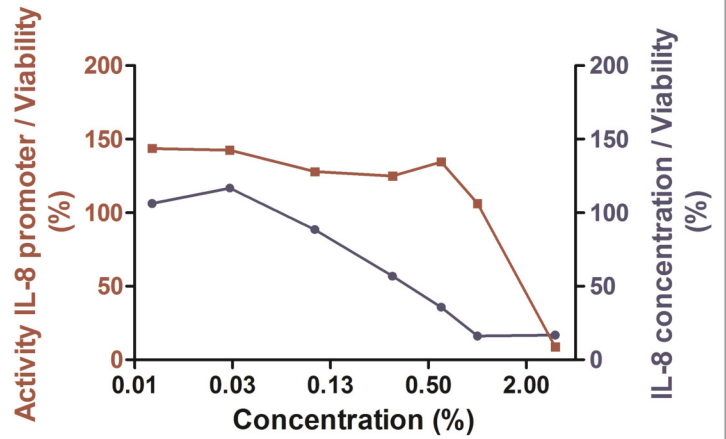

HeLa-TLR4  
THP-1

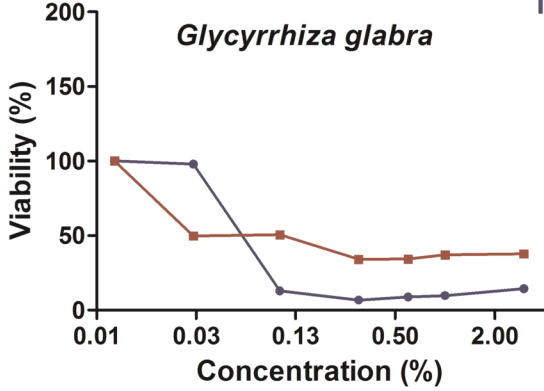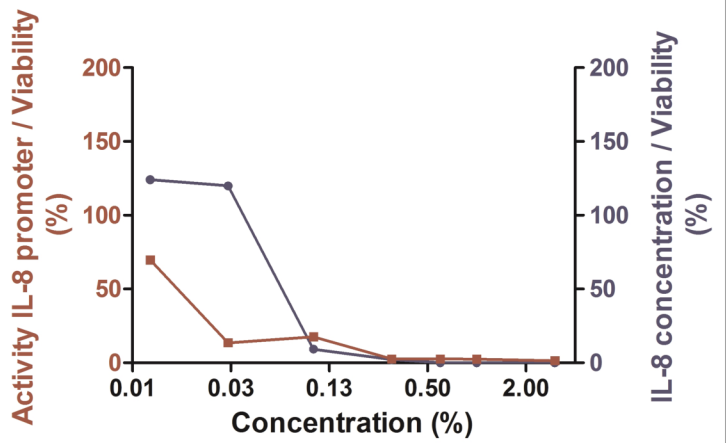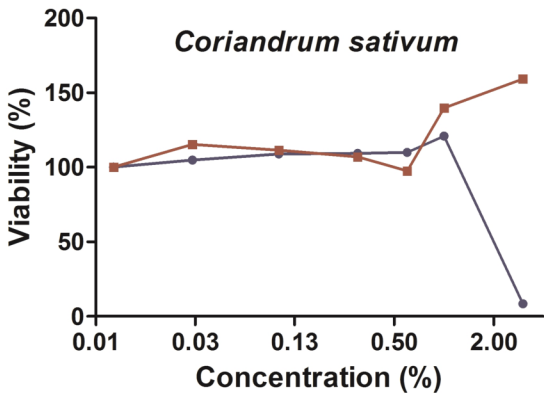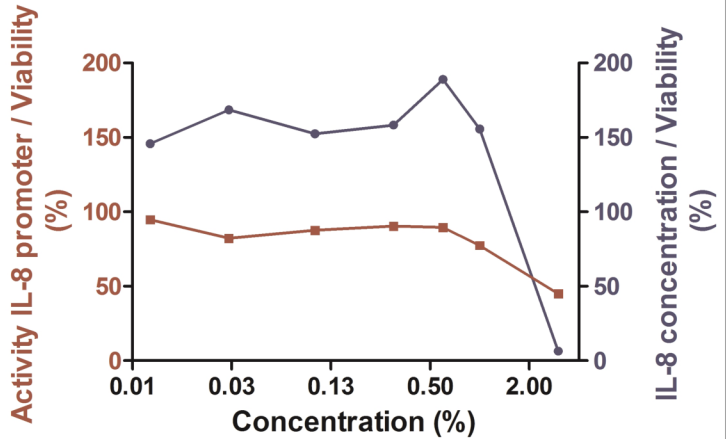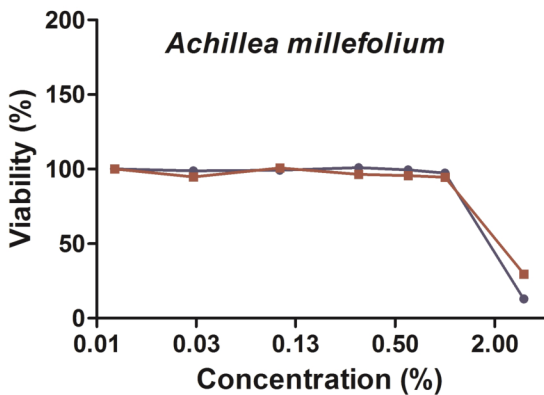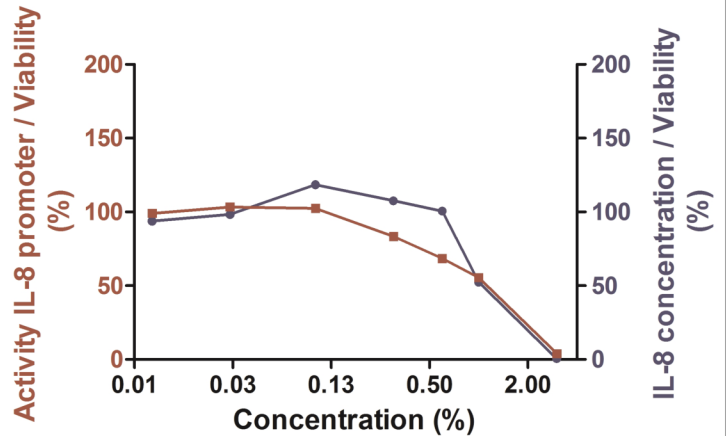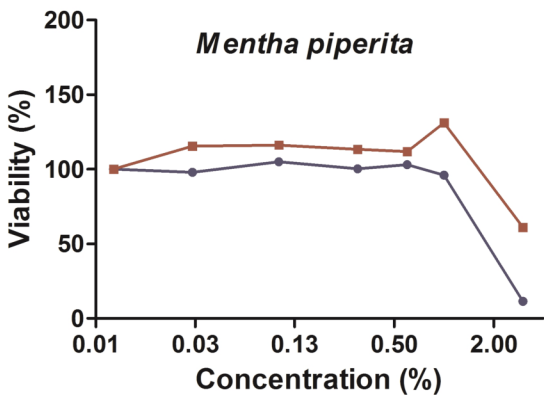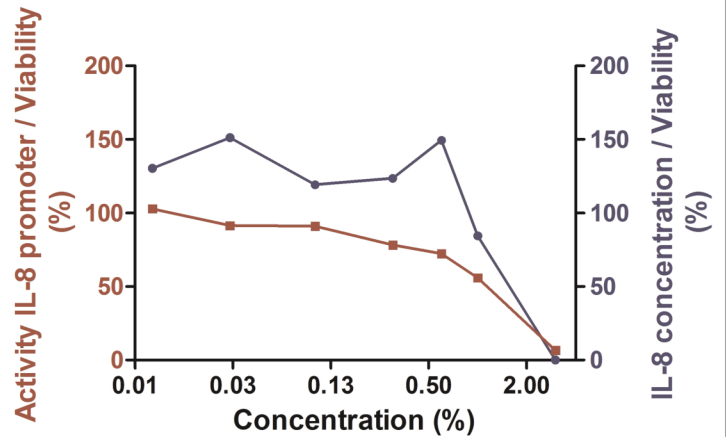

HeLa-TLR4  
THP-1

*Zingiber officinale*

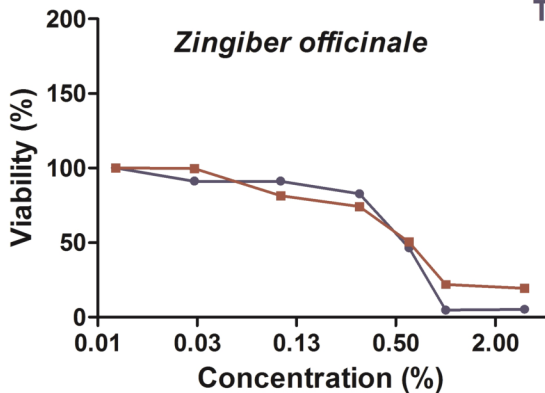

Activity IL-8 promoter / Viability (%)

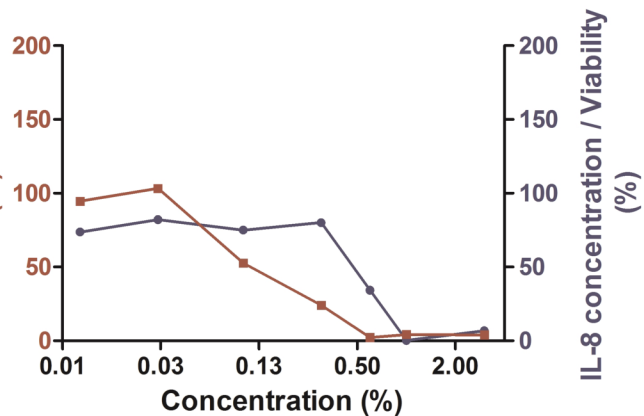

IL-8 concentration / Viability (%)

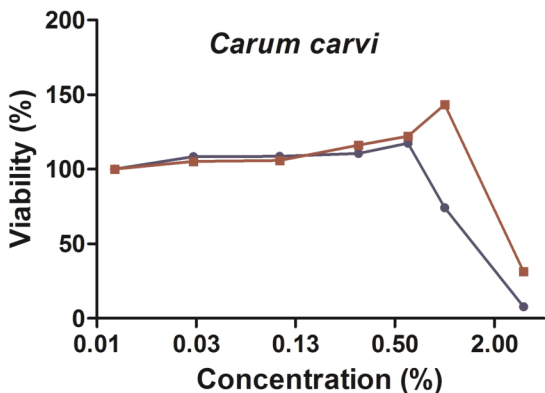

Activity IL-8 promoter / Viability (%)

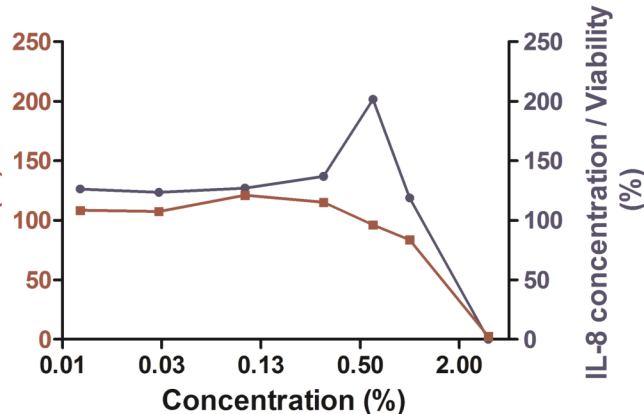

IL-8 concentration / Viability (%)

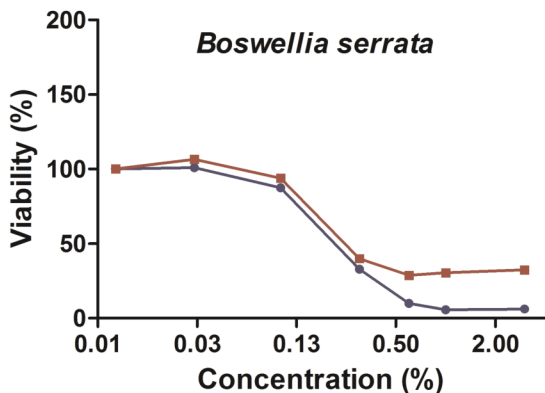

Activity IL-8 promoter / Viability (%)

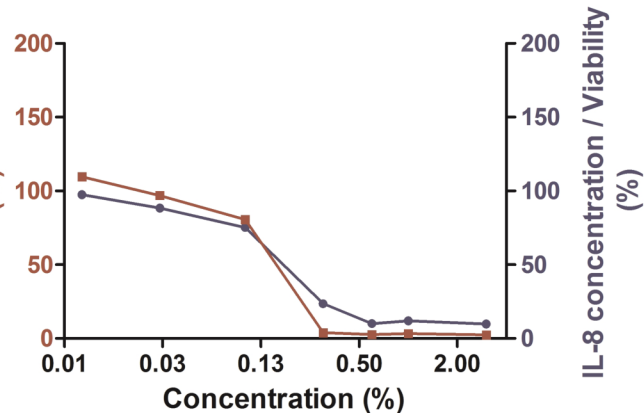

IL-8 concentration / Viability (%)

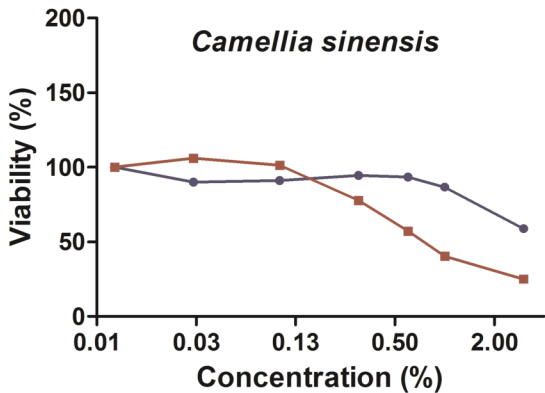

Activity IL-8 promoter / Viability (%)

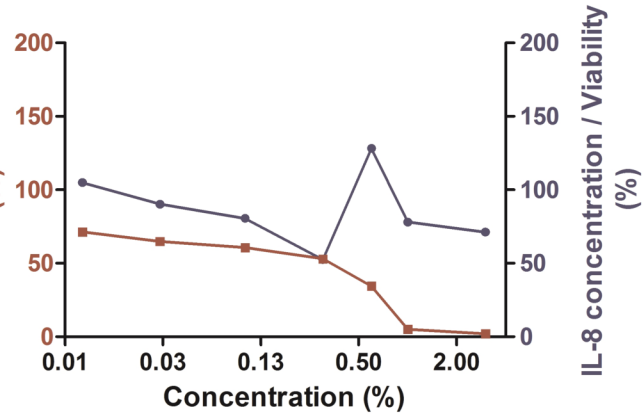

IL-8 concentration / Viability (%)

HeLa-TLR4  
THP-1

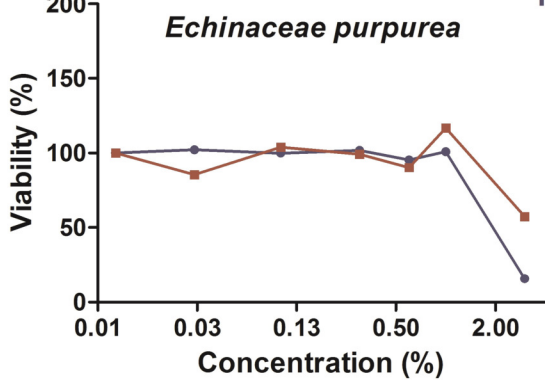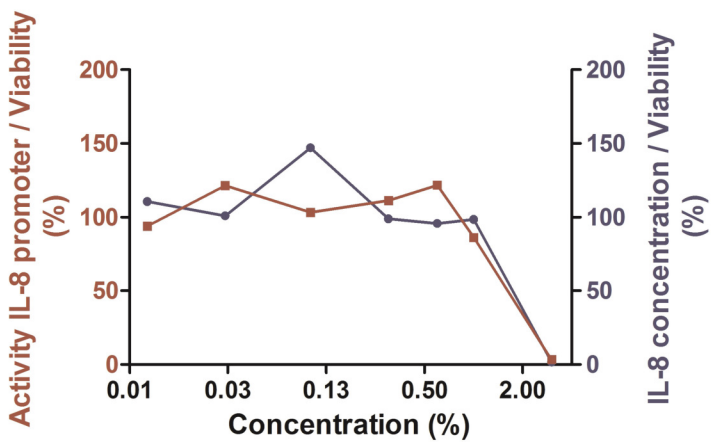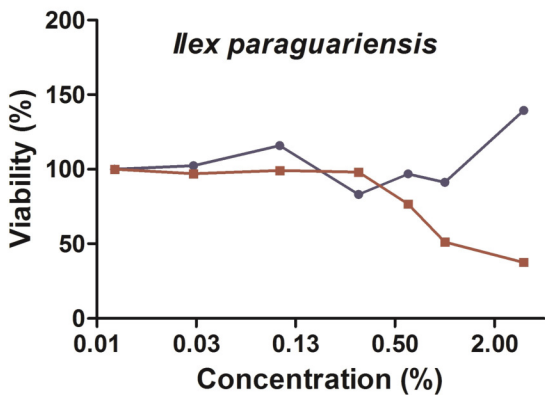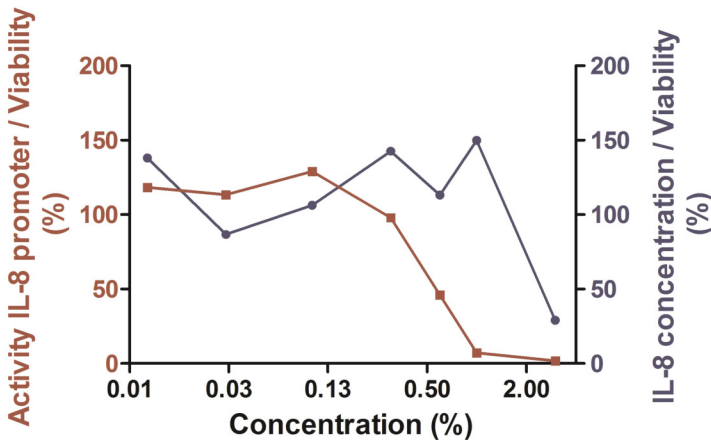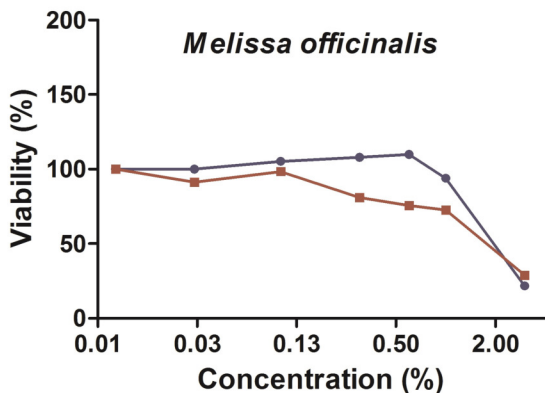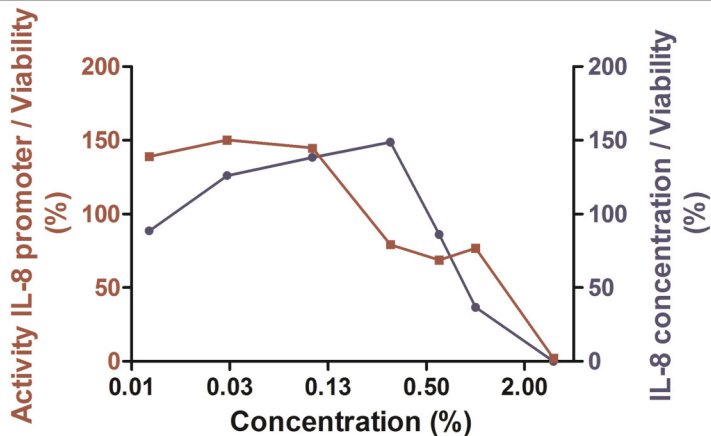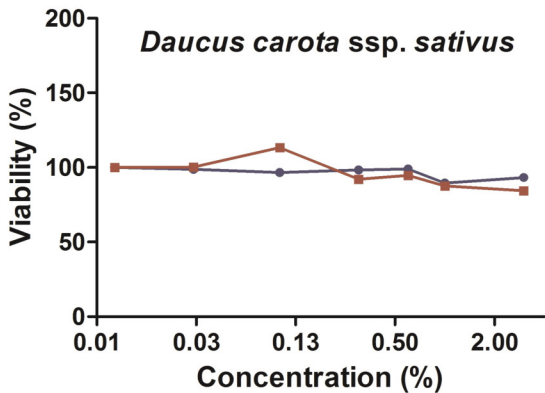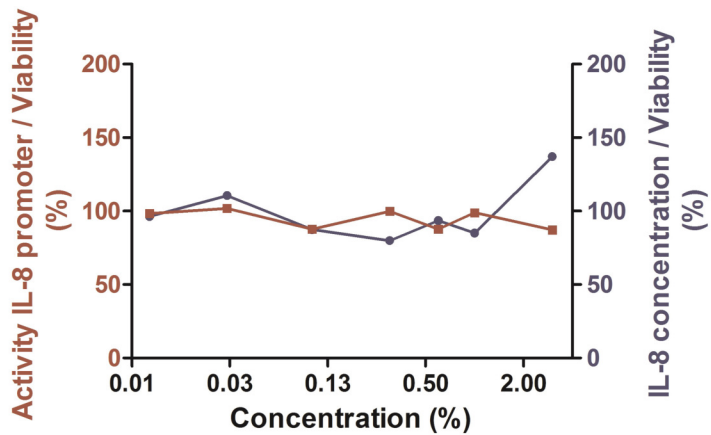

HeLa-TLR4  
THP-1

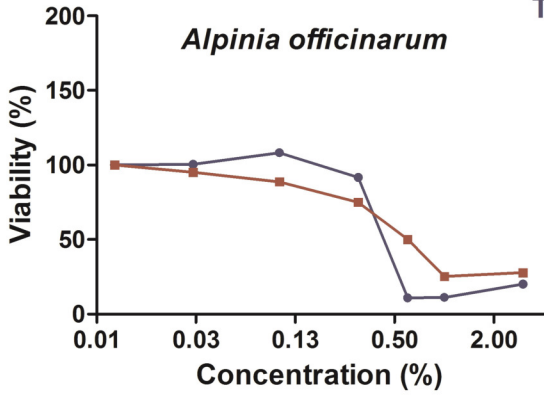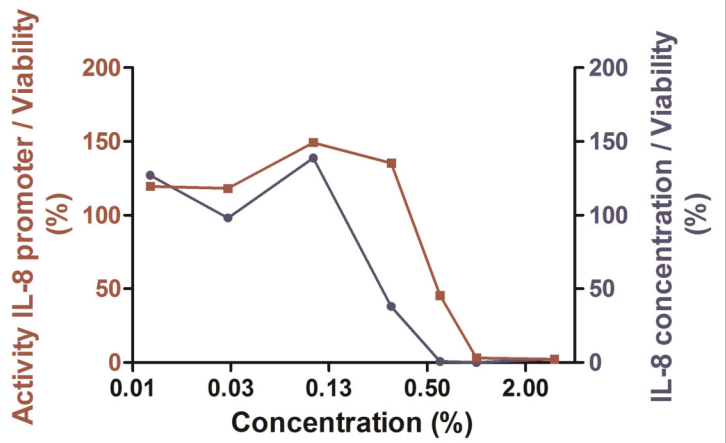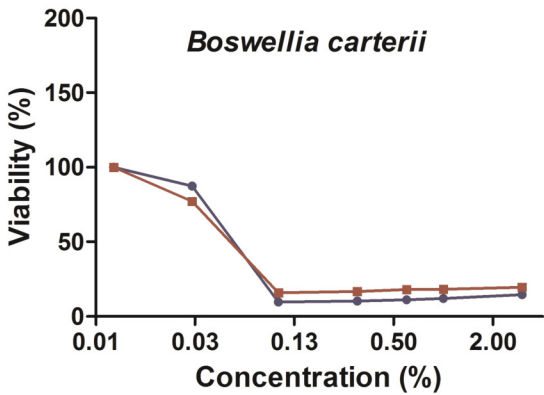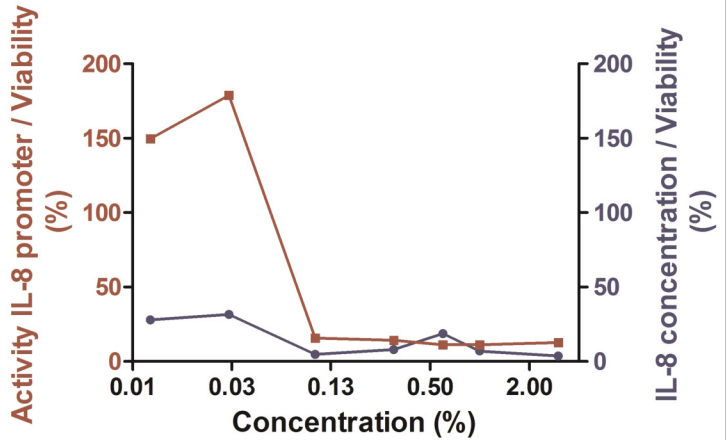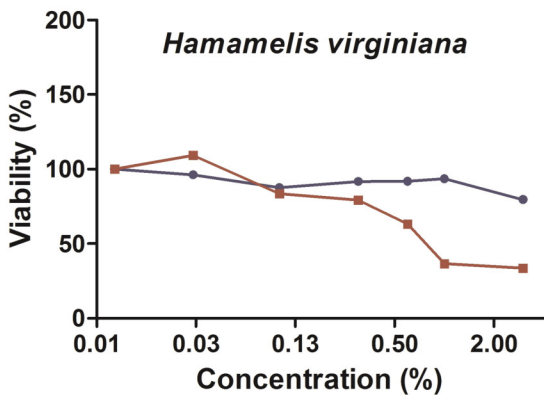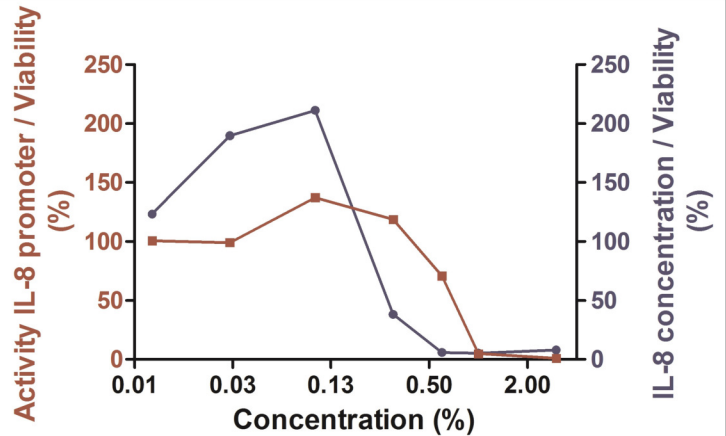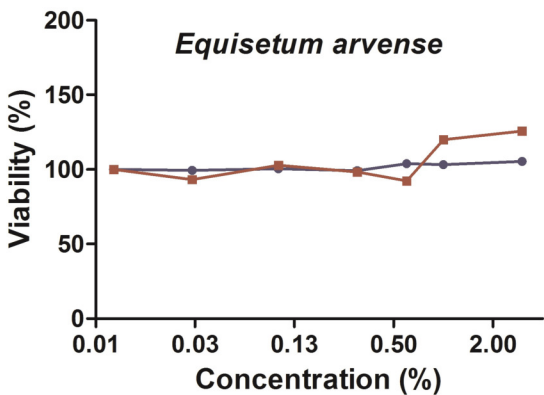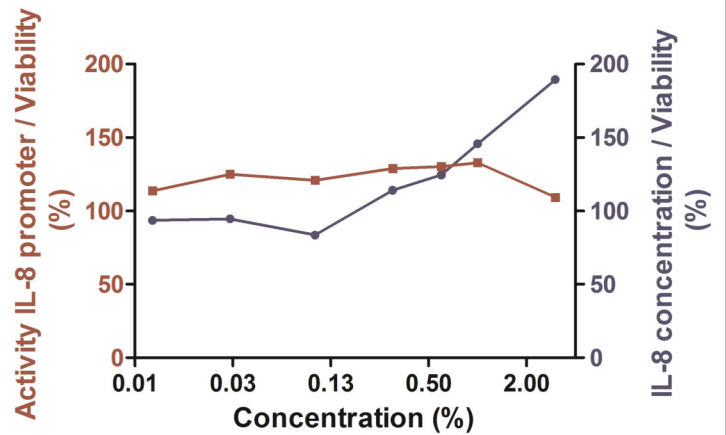



HeLa-TLR4  
THP-1

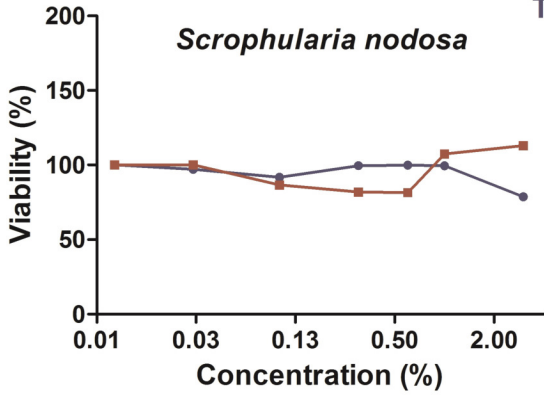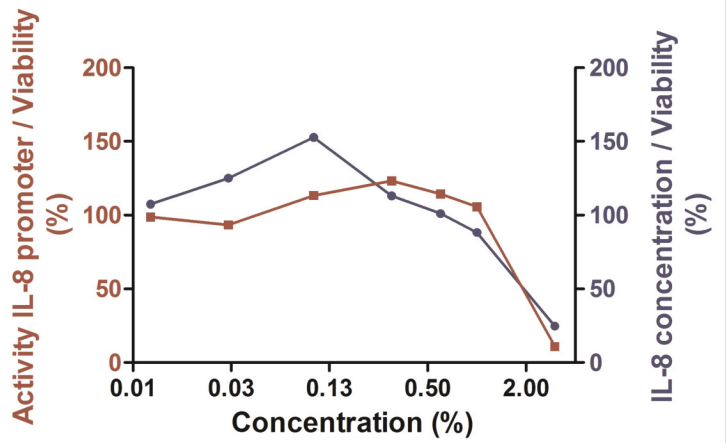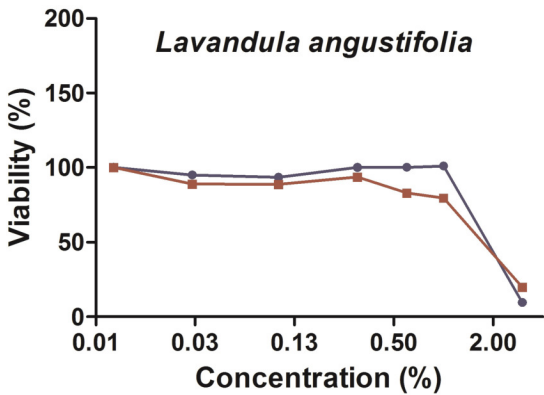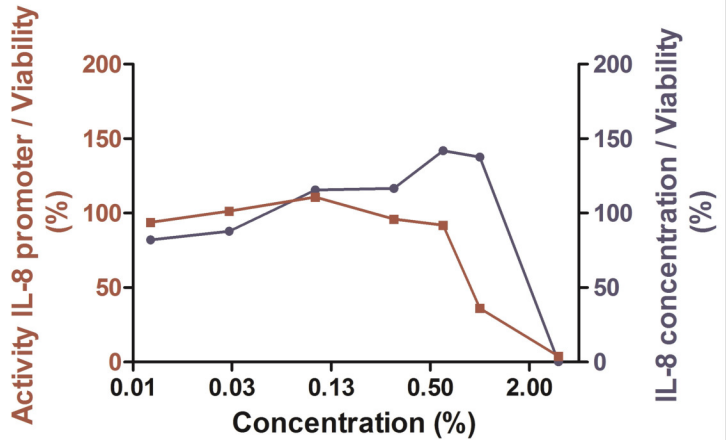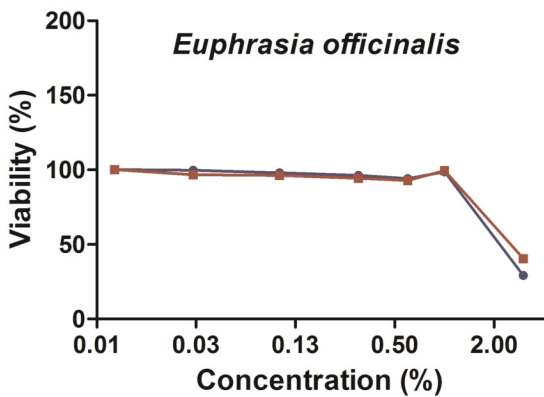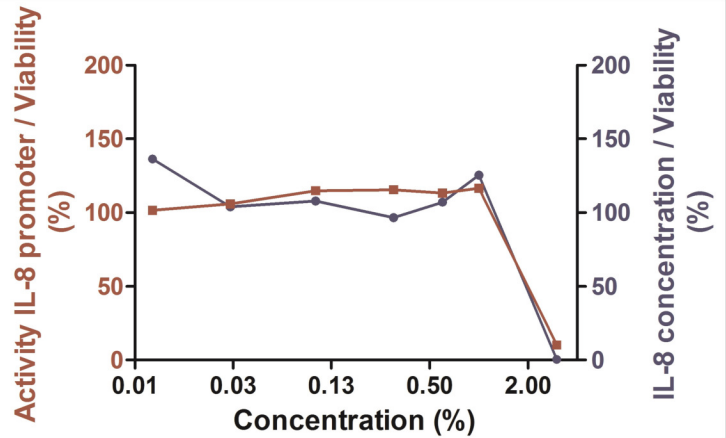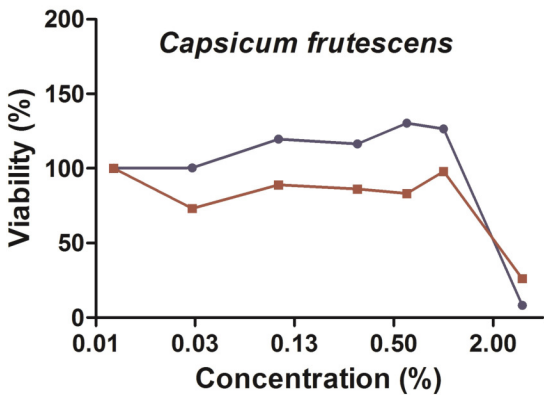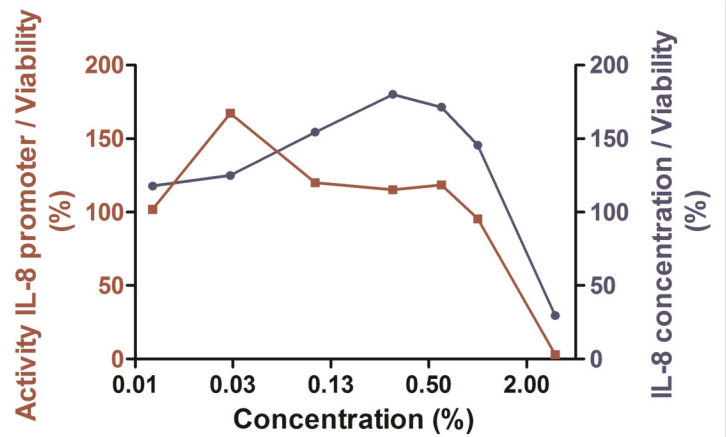

HeLa-TLR4  
THP-1

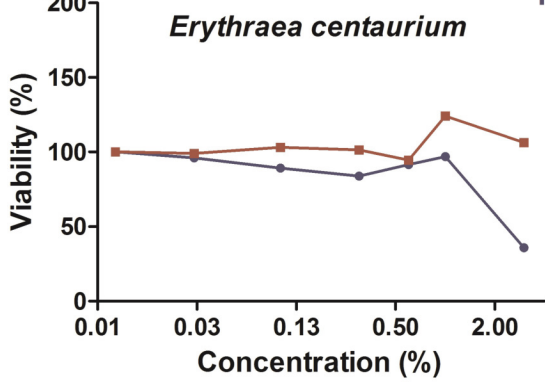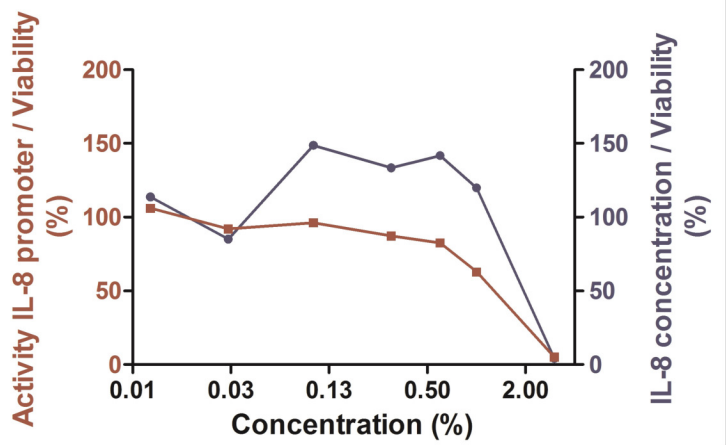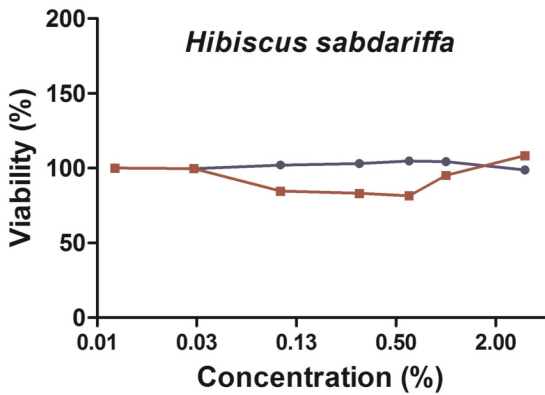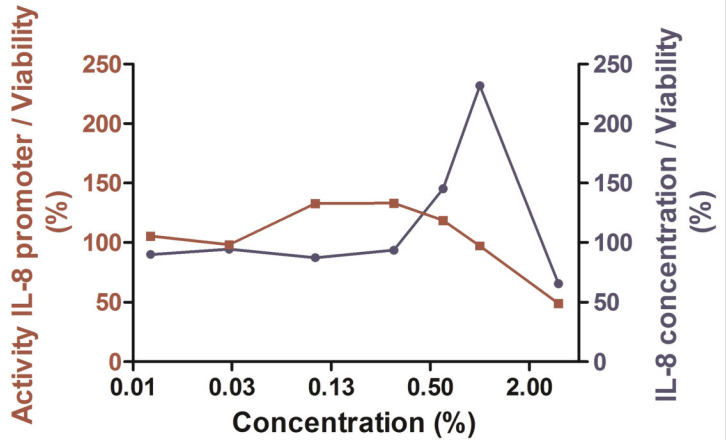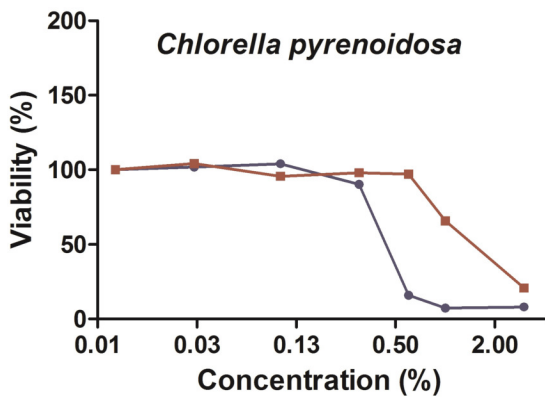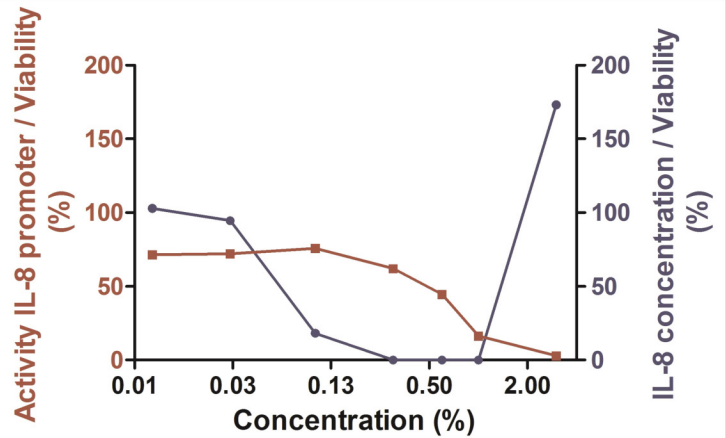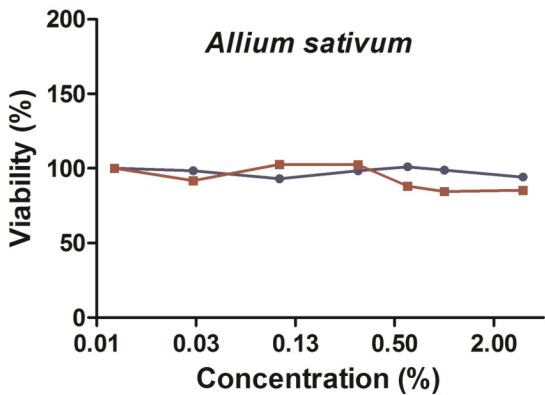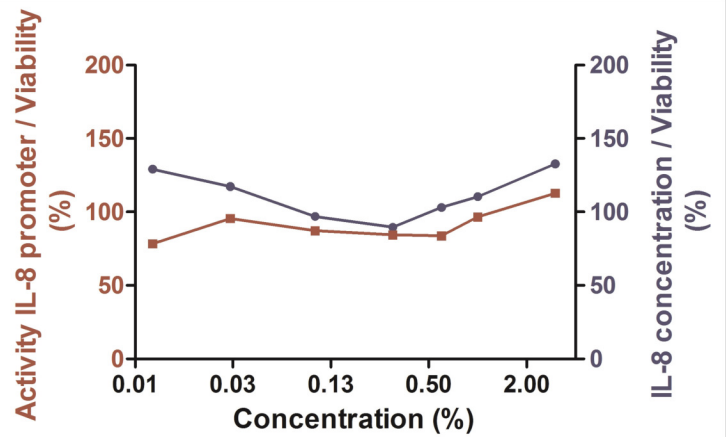

HeLa-TLR4  
THP-1

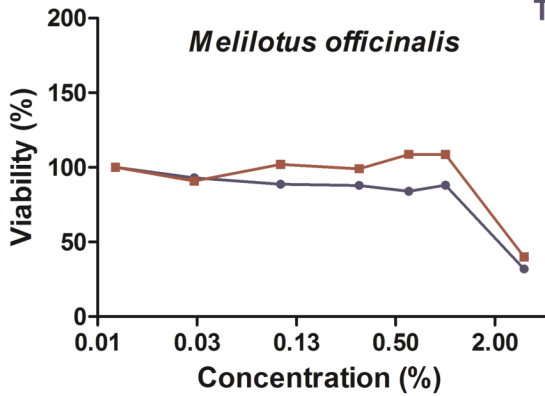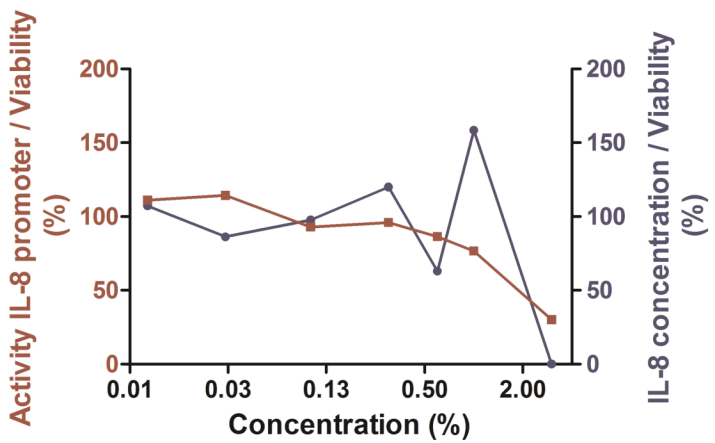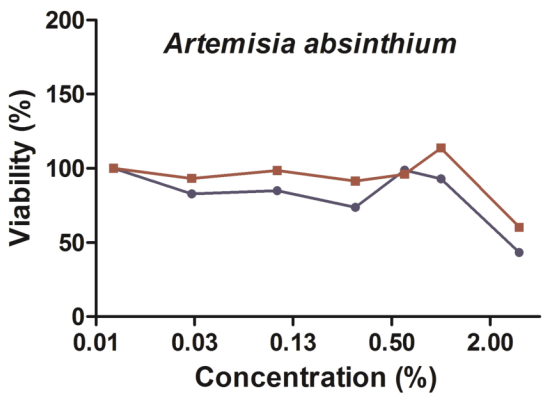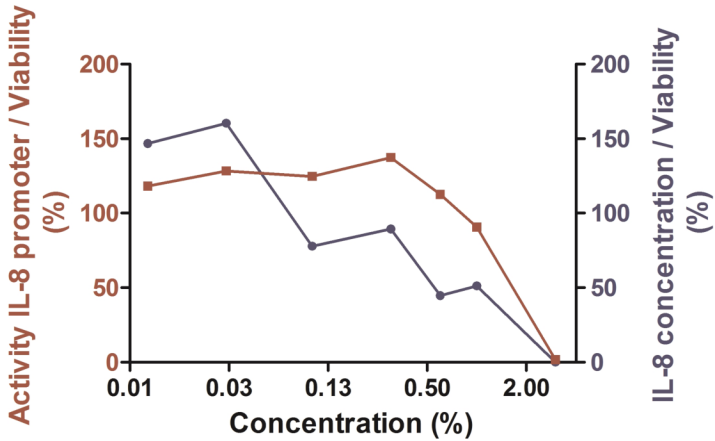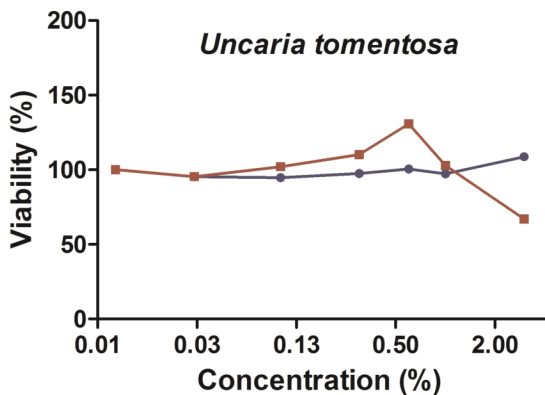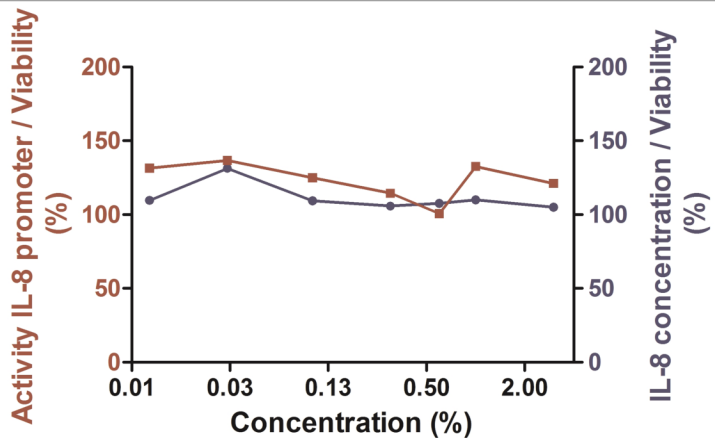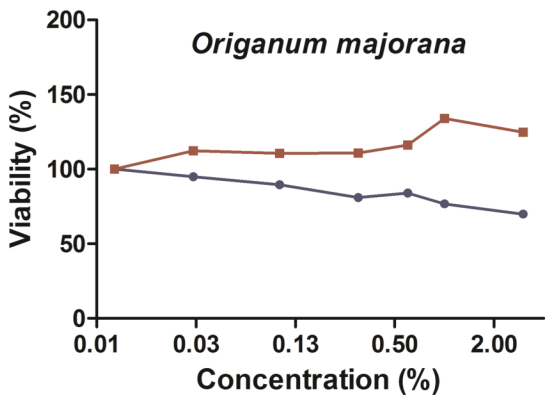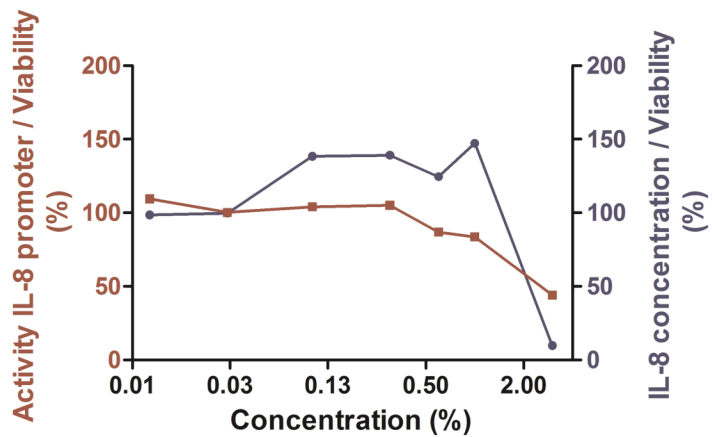

HeLa-TLR4  
THP-1

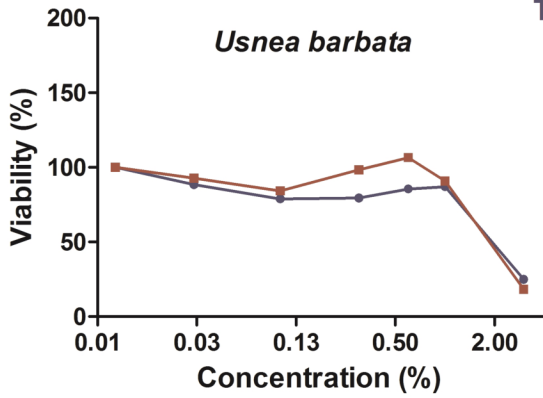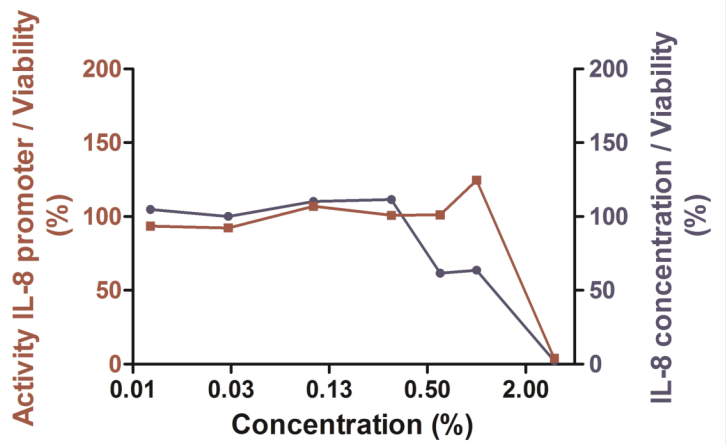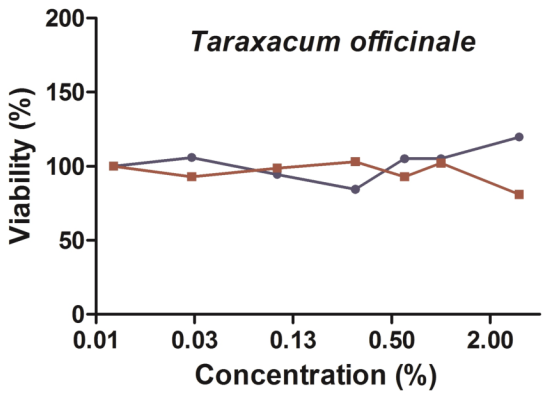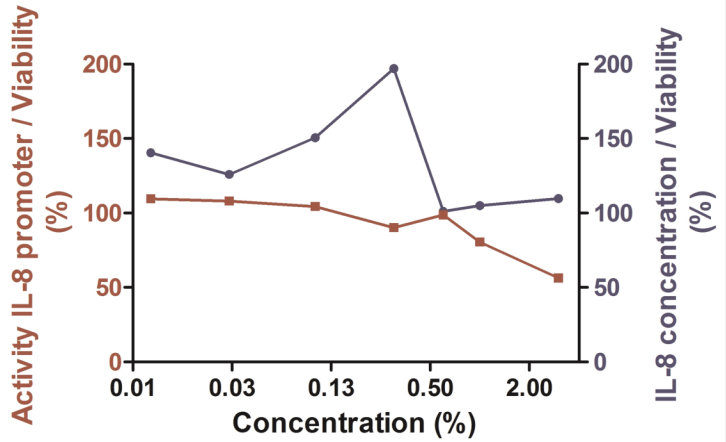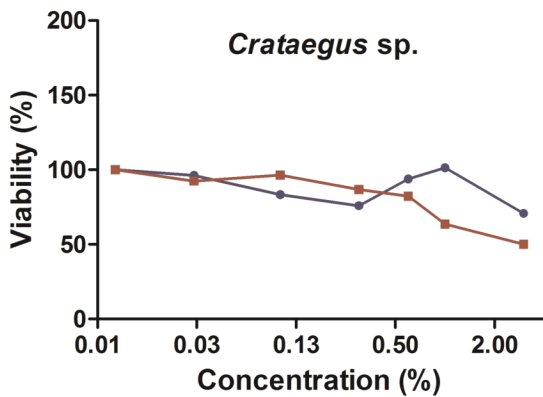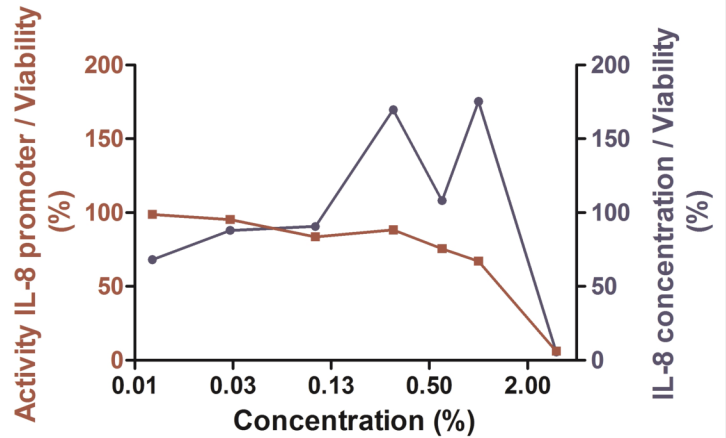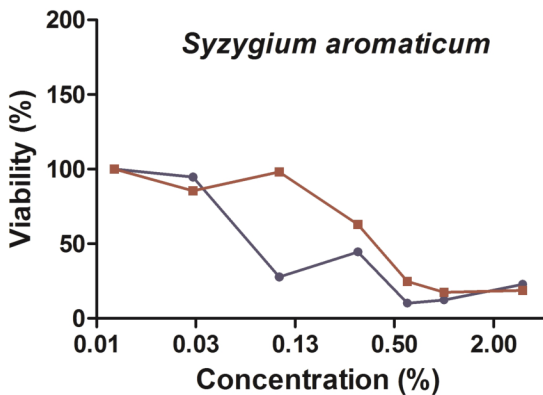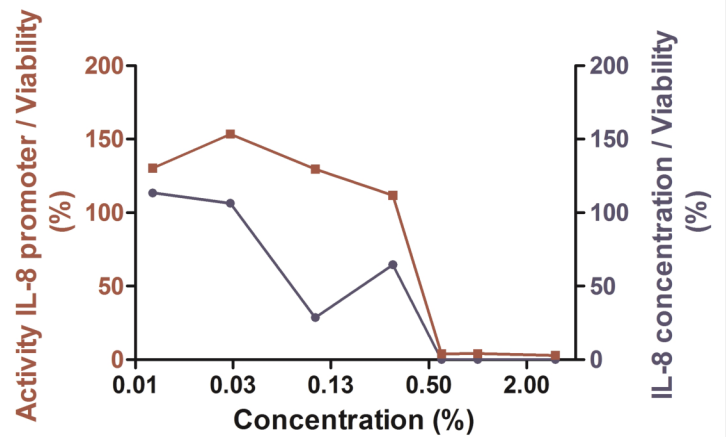

HeLa-TLR4  
THP-1

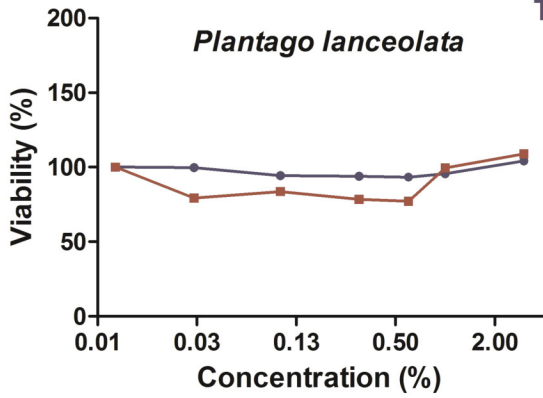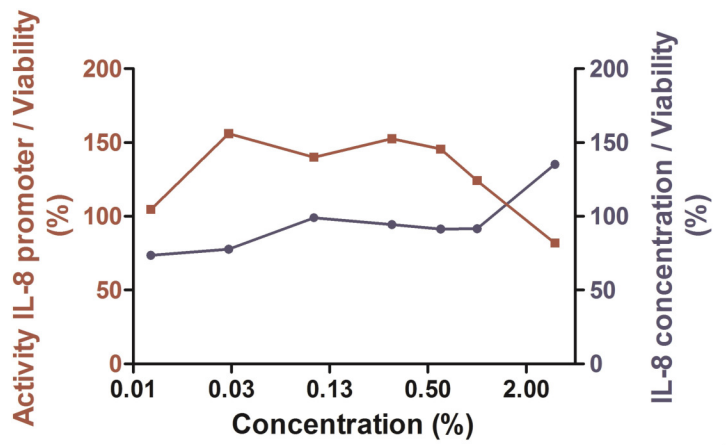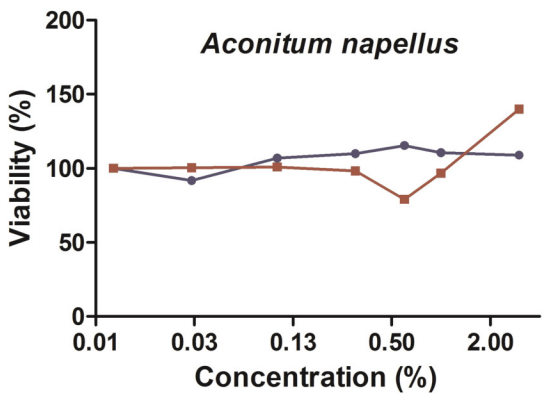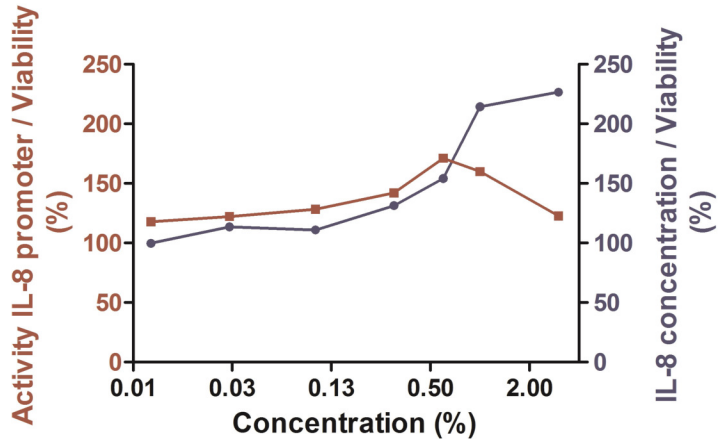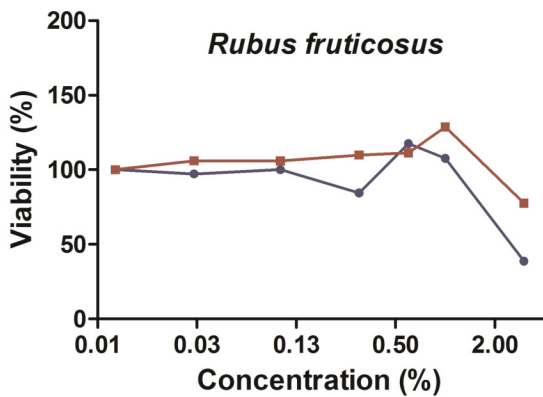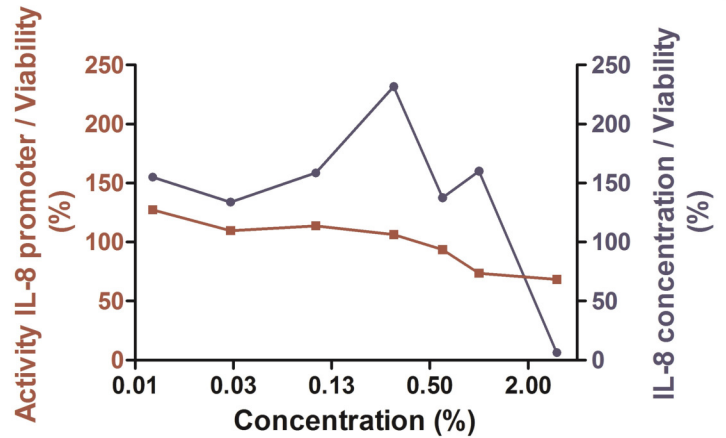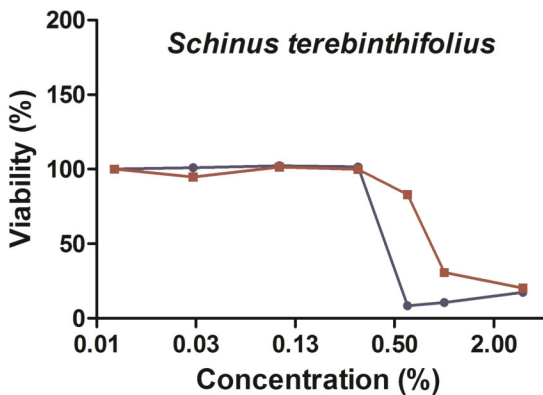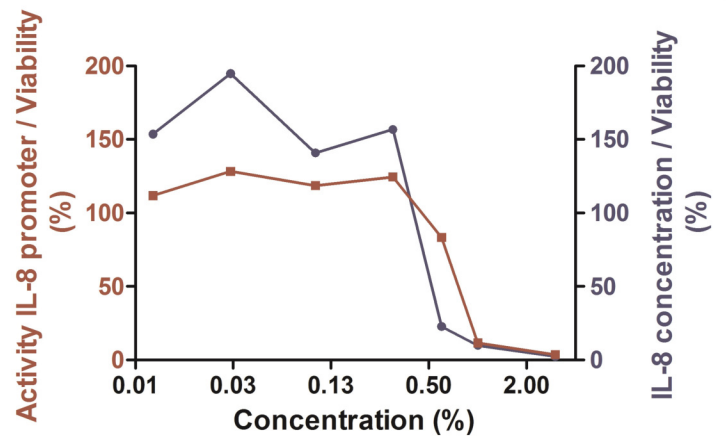

HeLa-TLR4  
THP-1

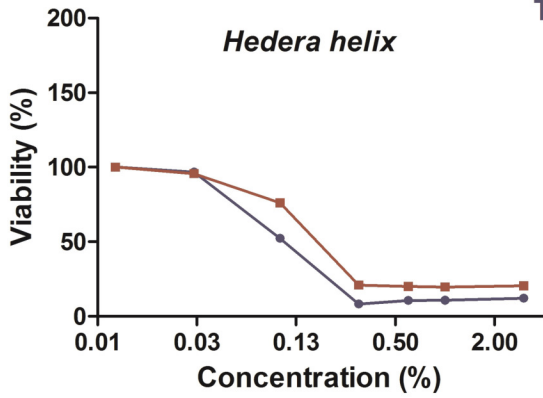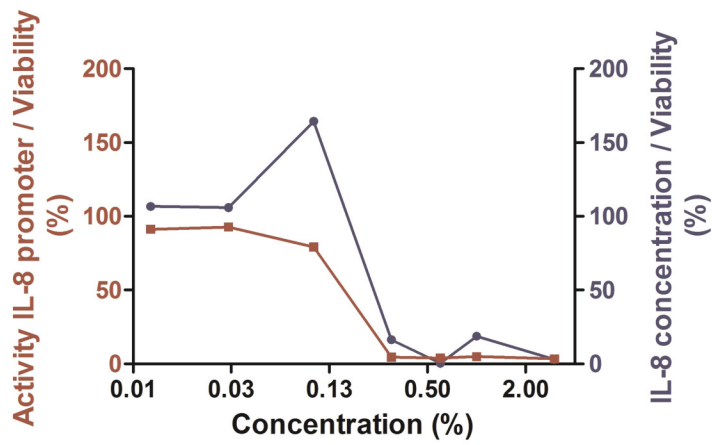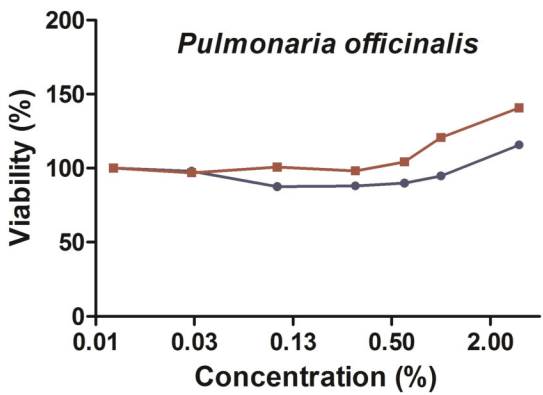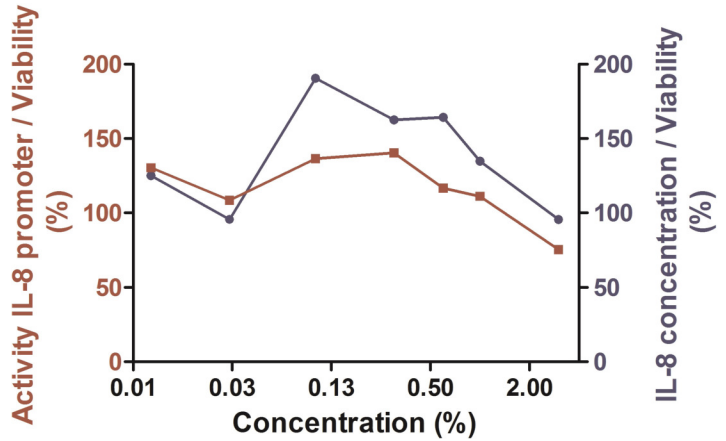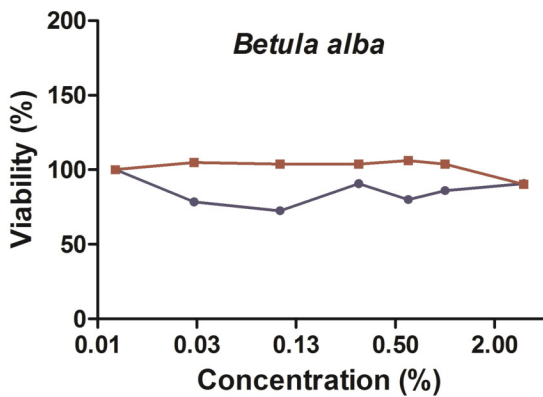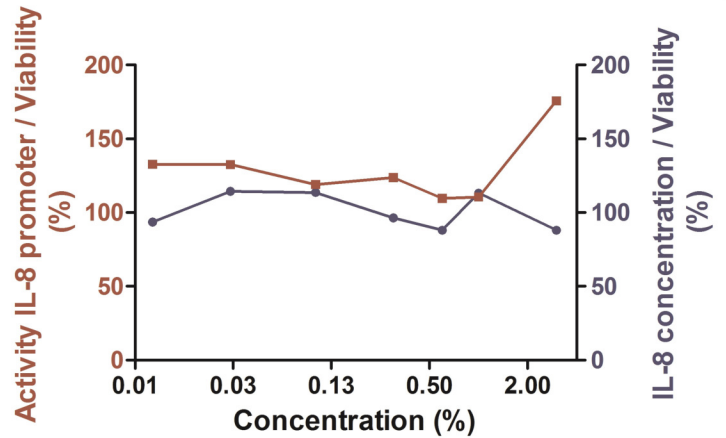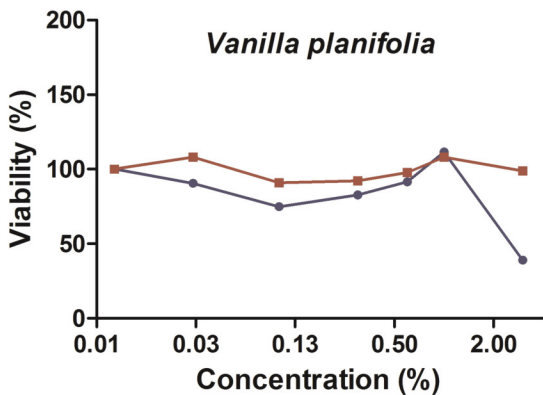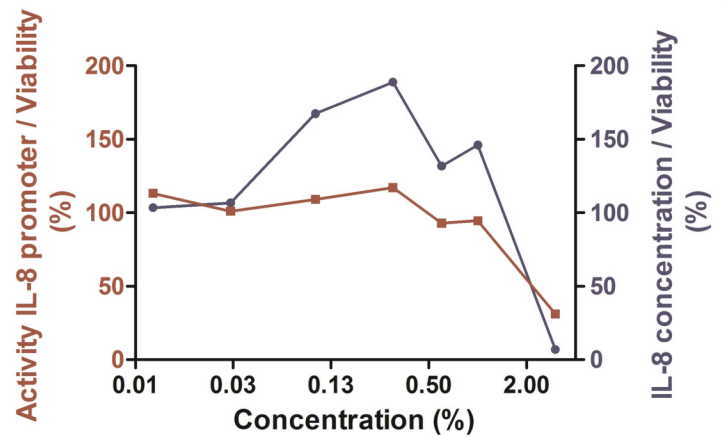

HeLa-TLR4  
THP-1

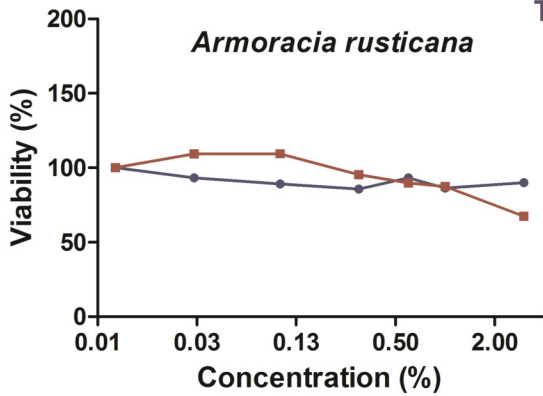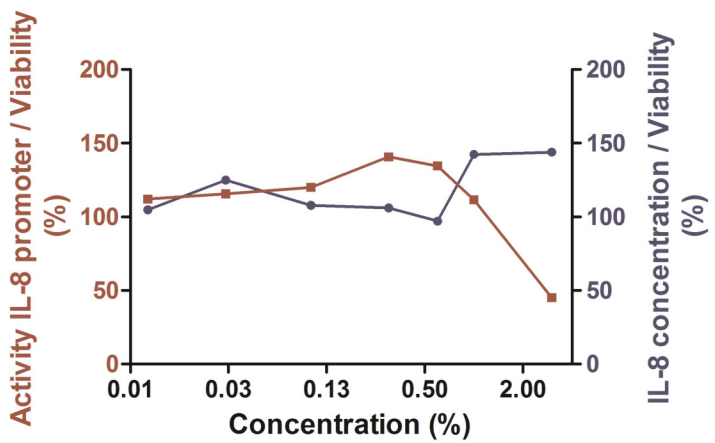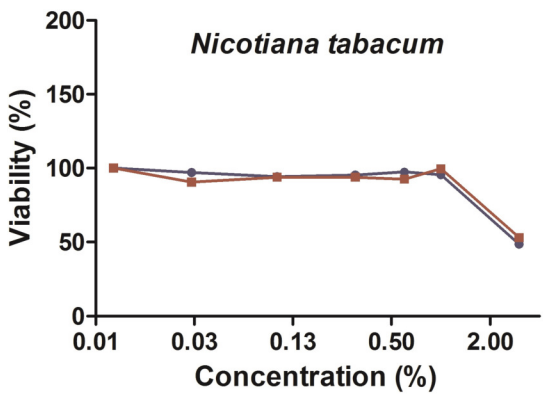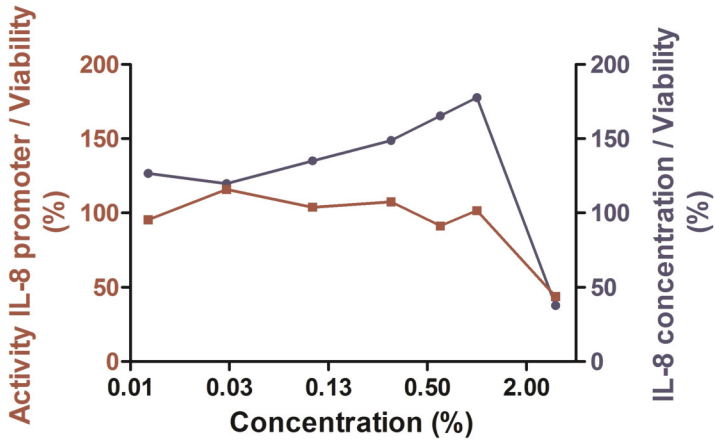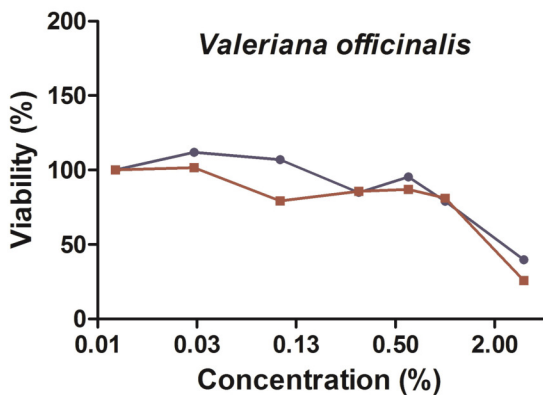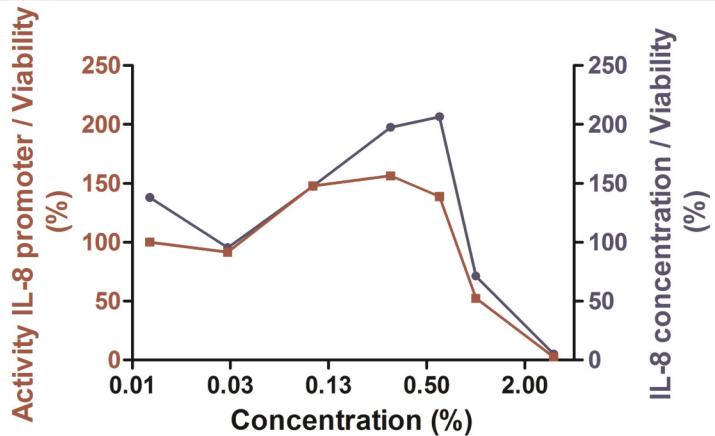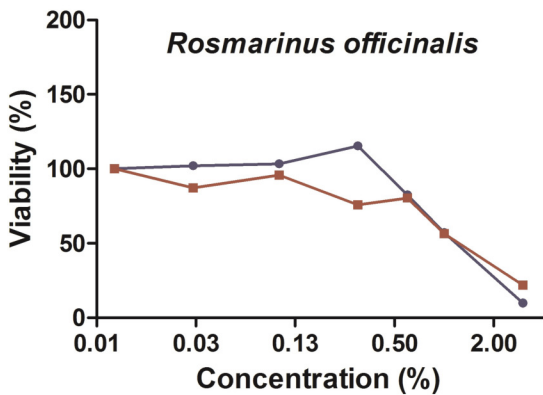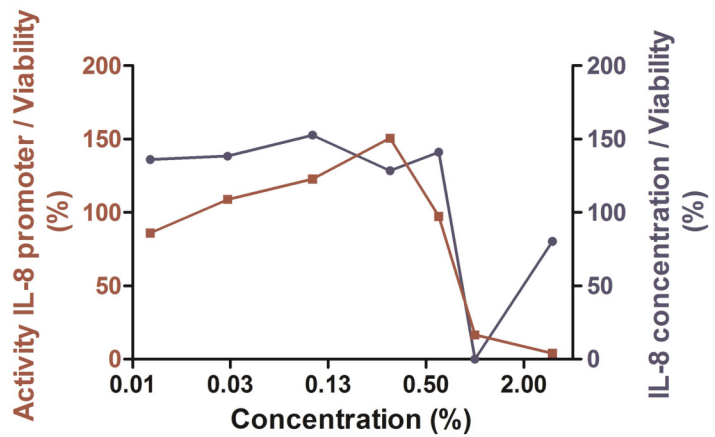

HeLa-TLR4  
THP-1

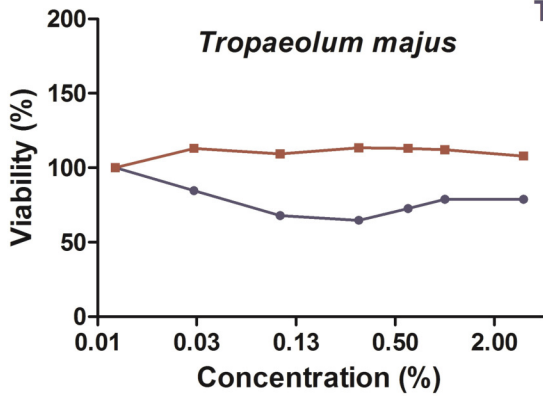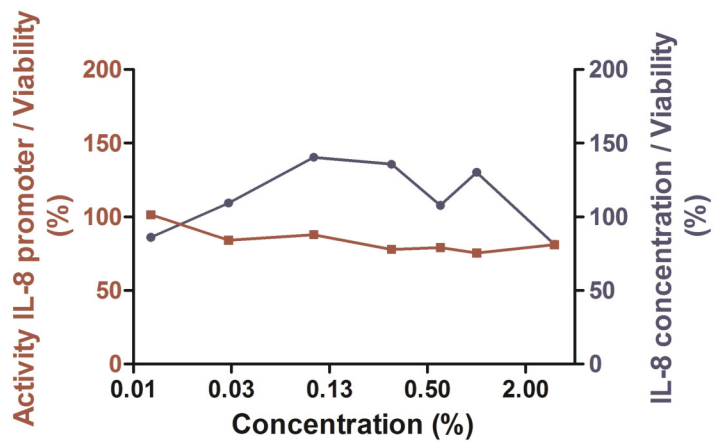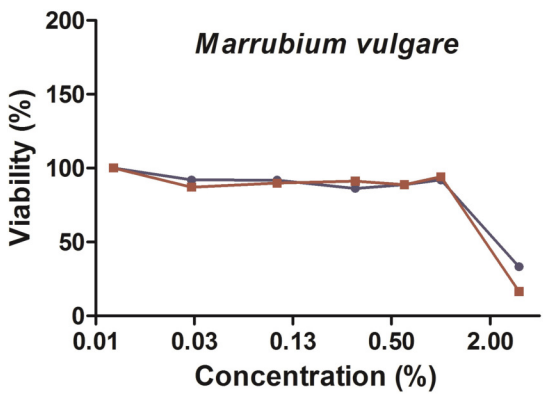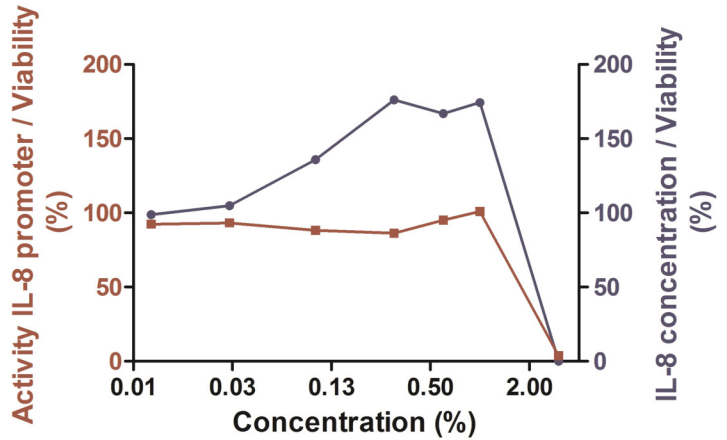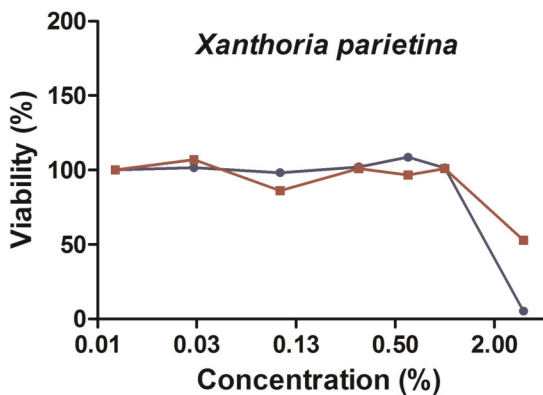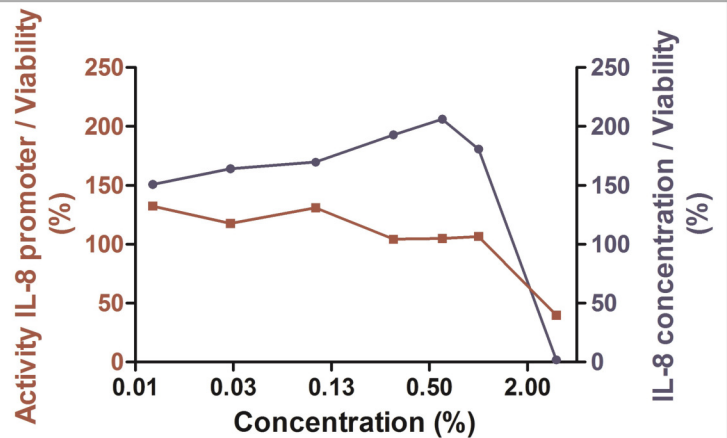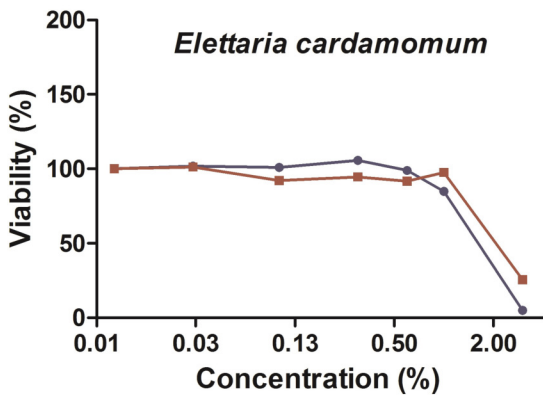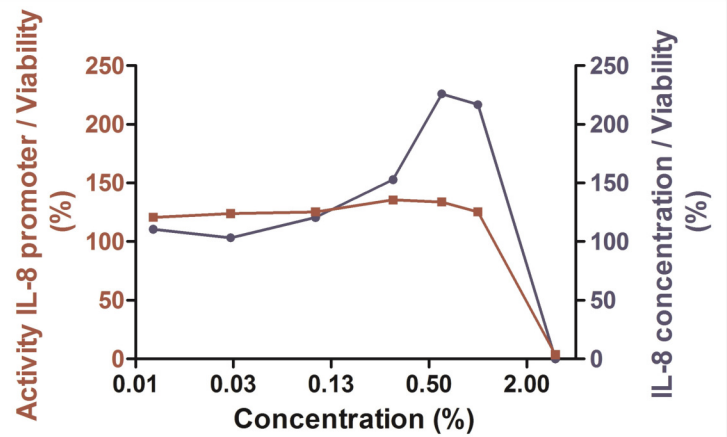



HeLa-TLR4  
THP-1

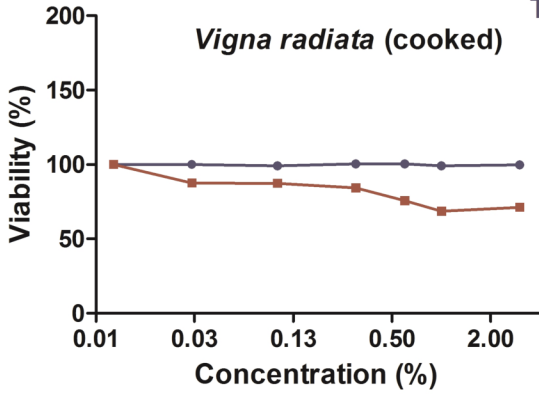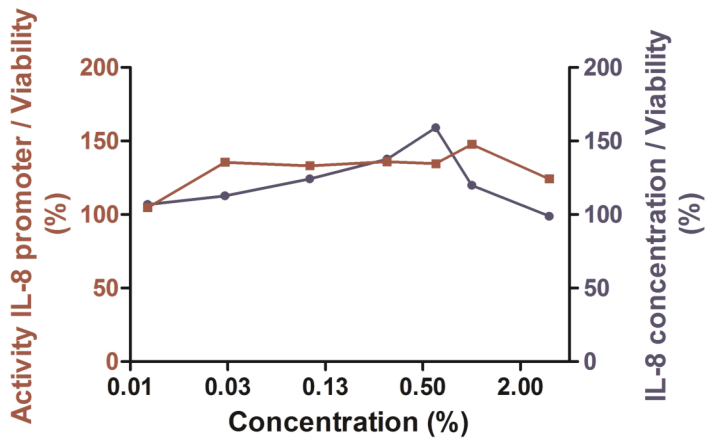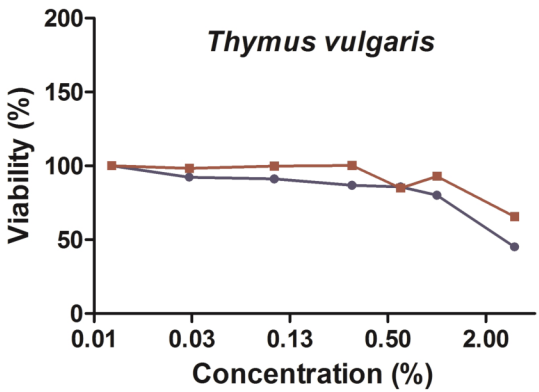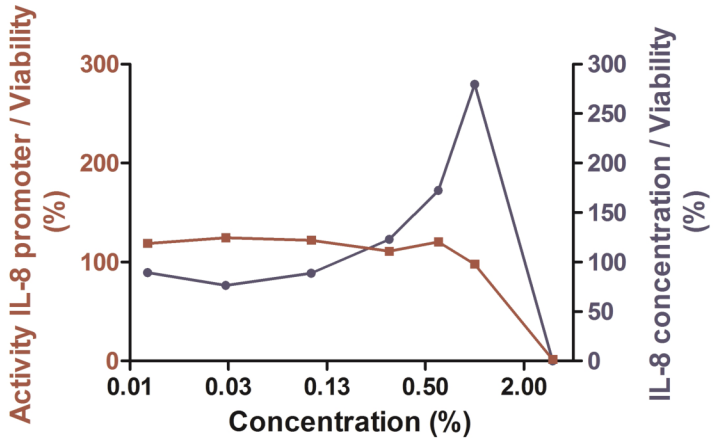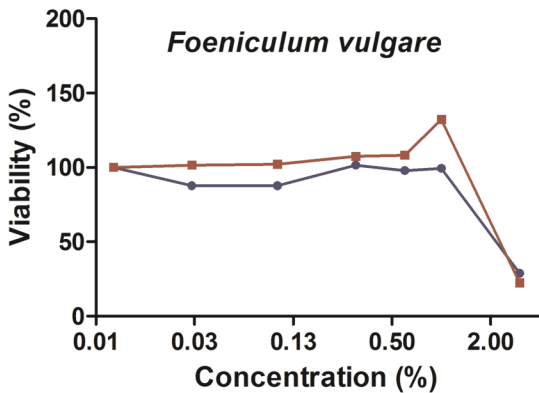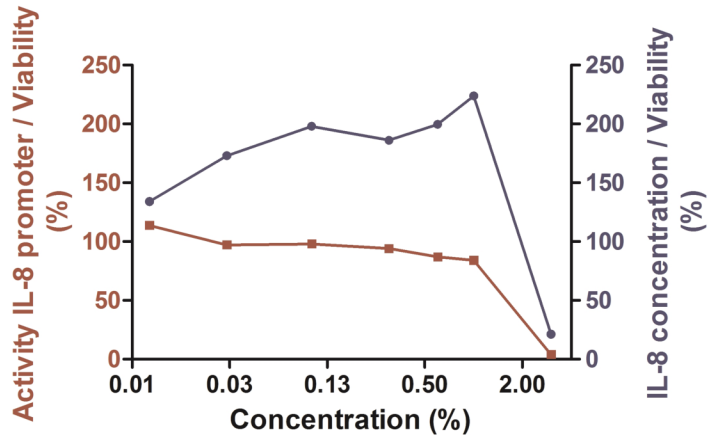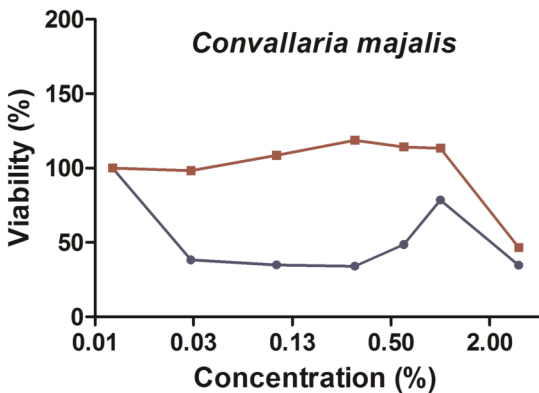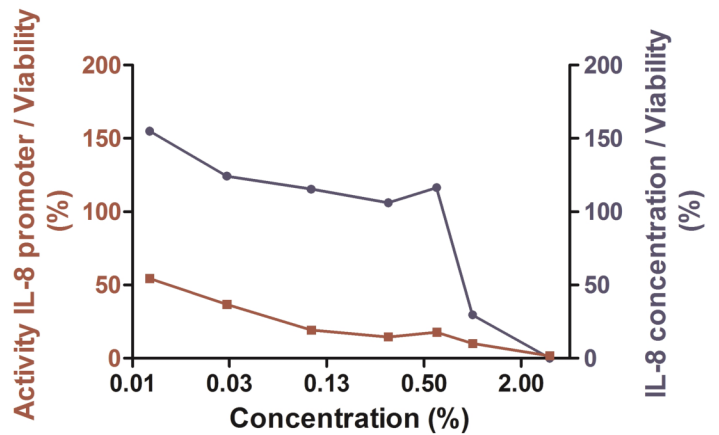

HeLa-TLR4  
THP-1

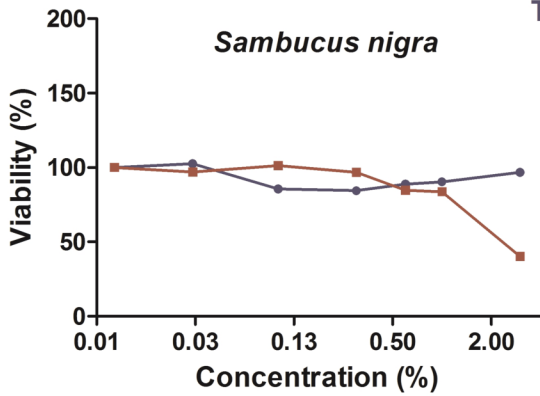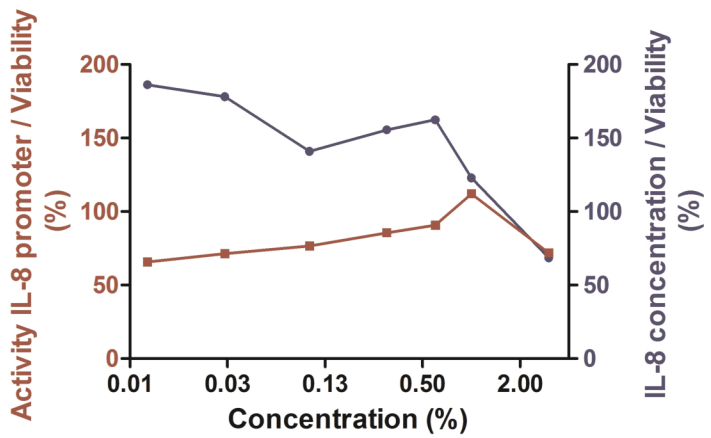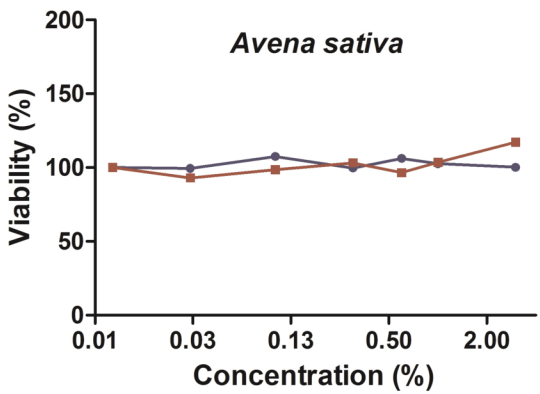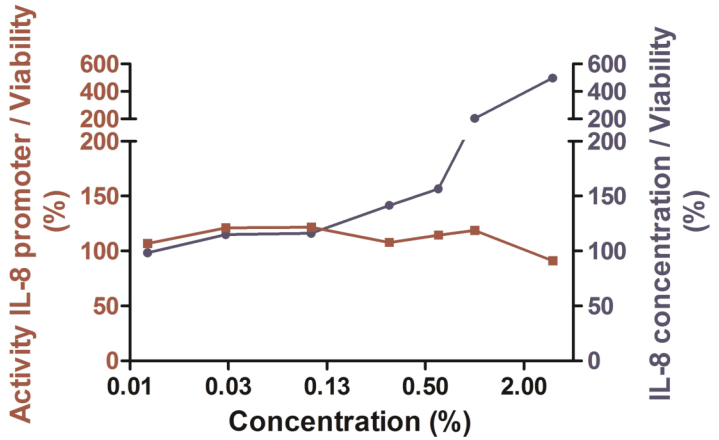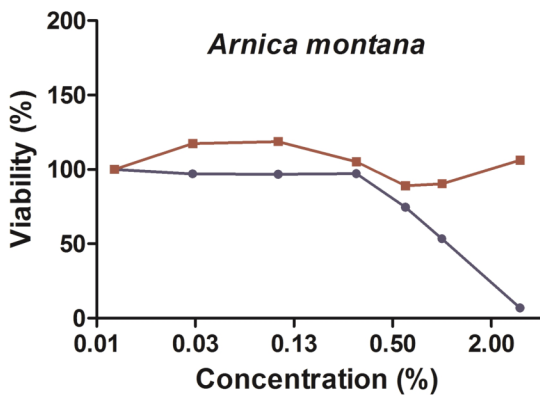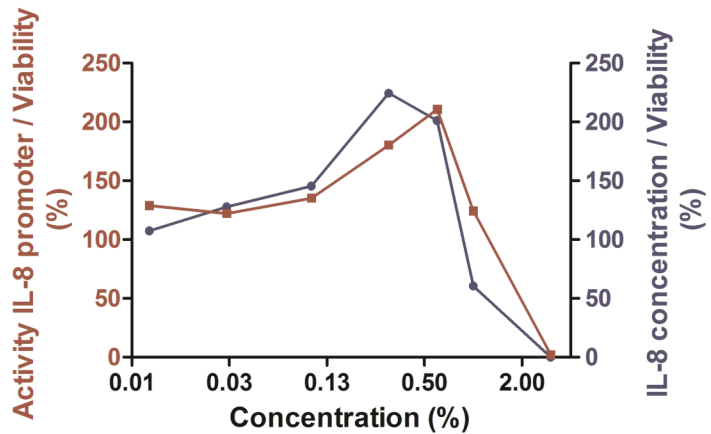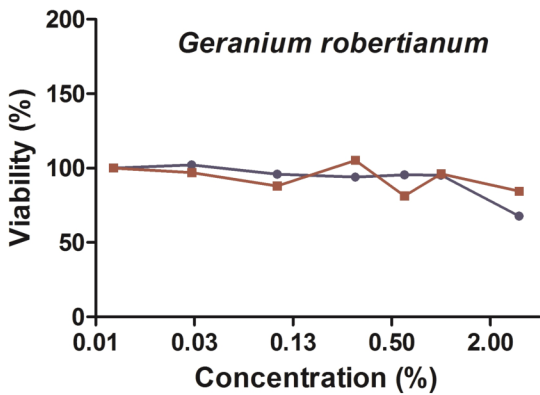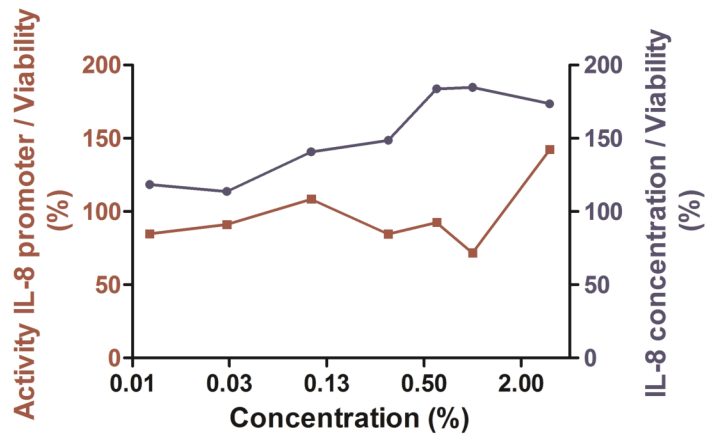

HeLa-TLR4  
THP-1

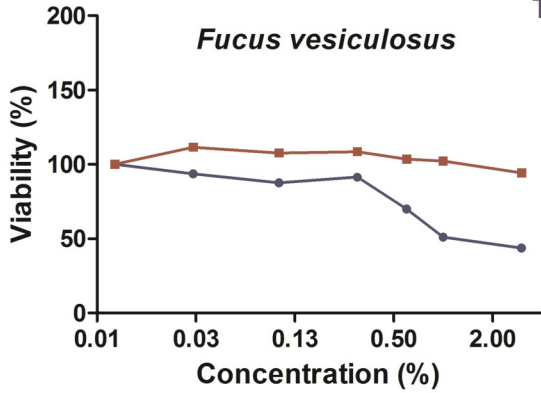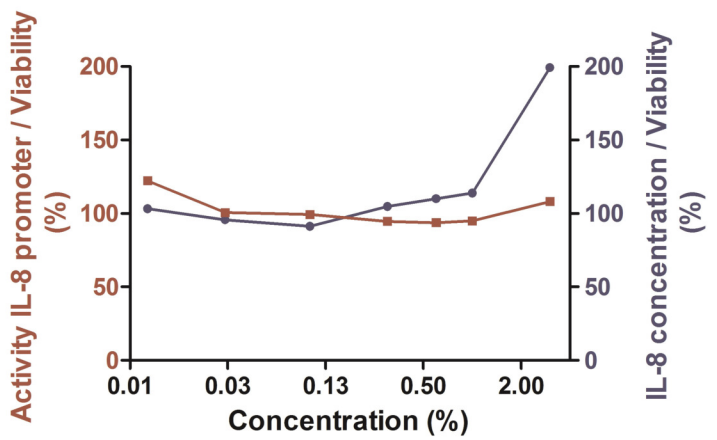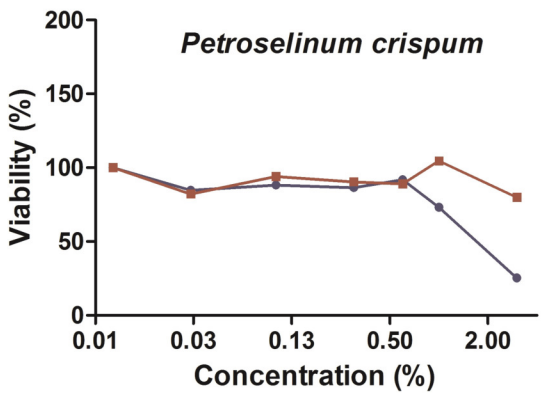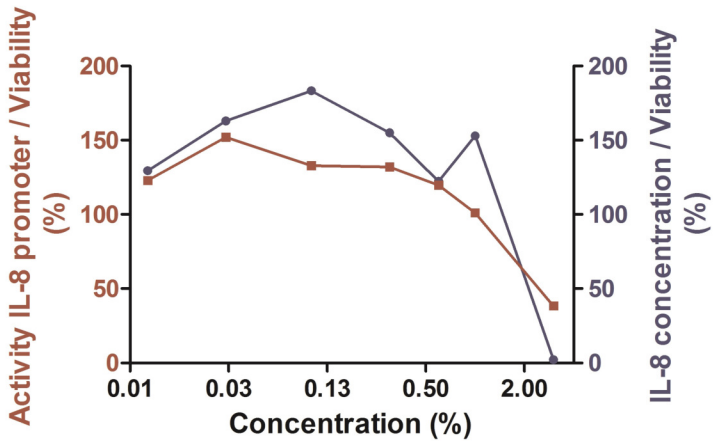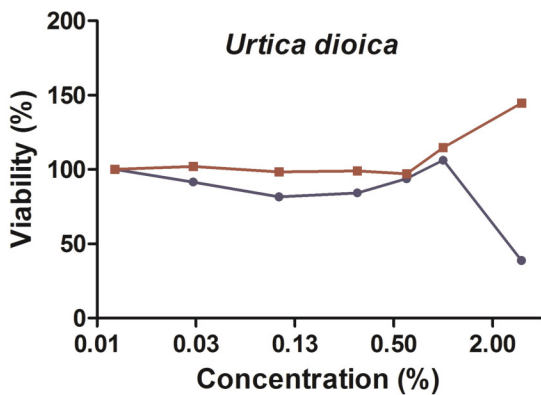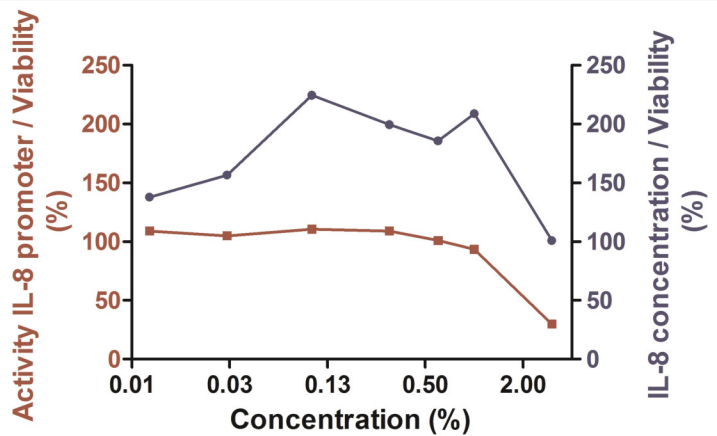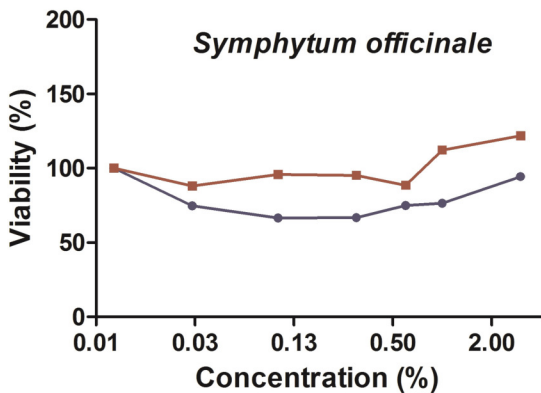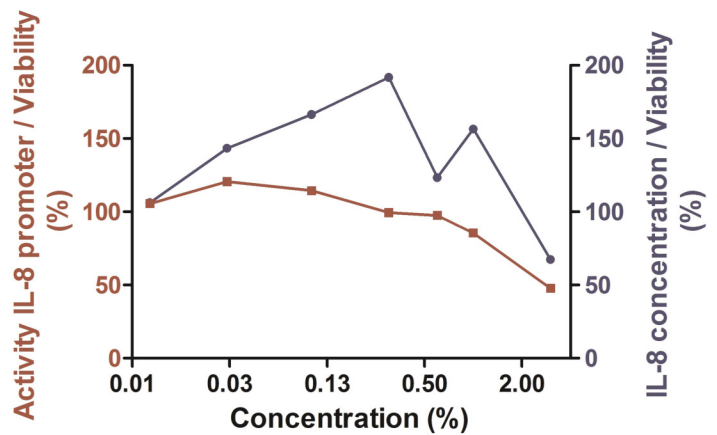

HeLa-TLR4  
THP-1

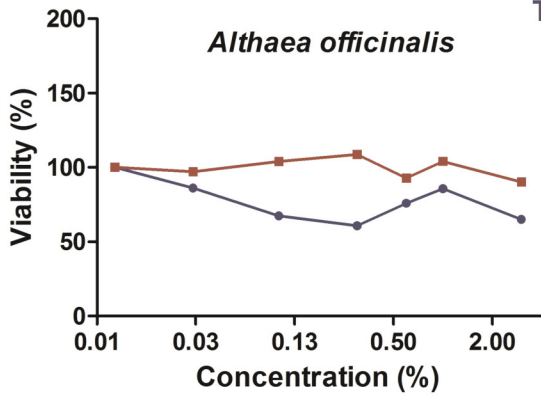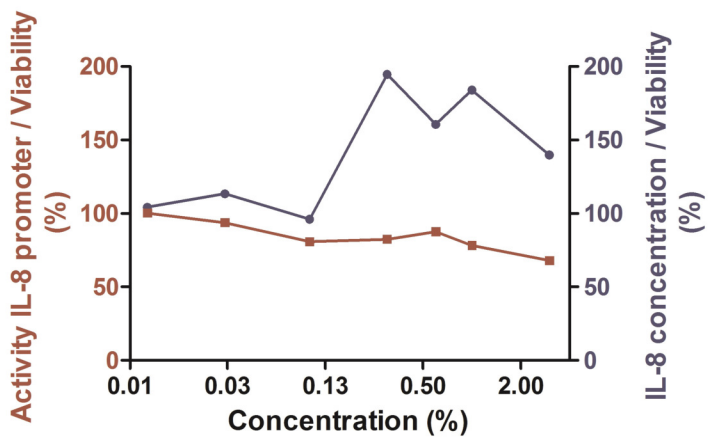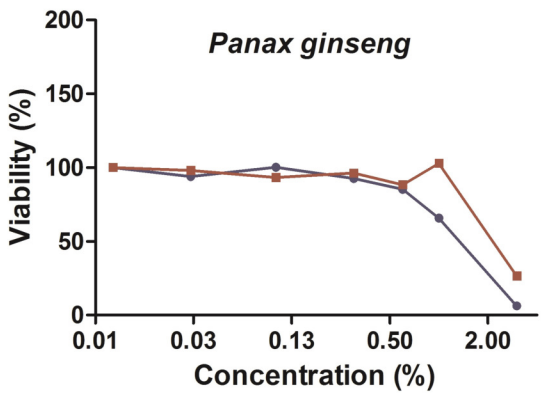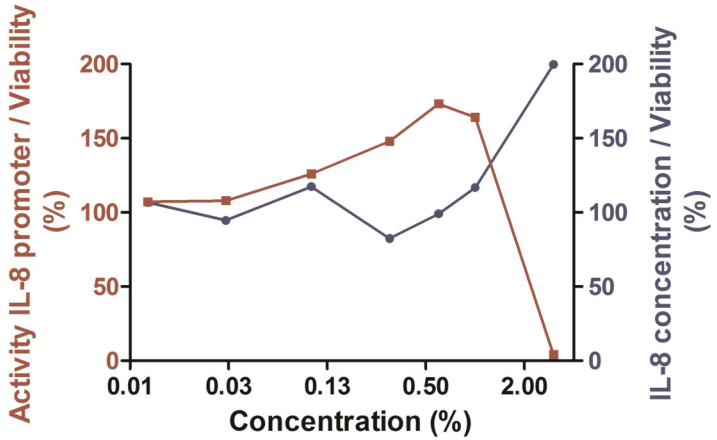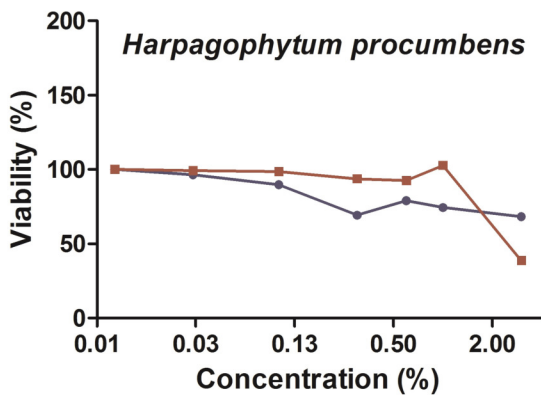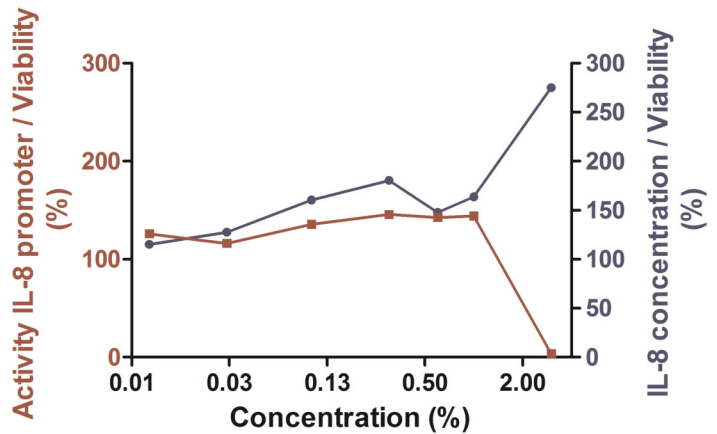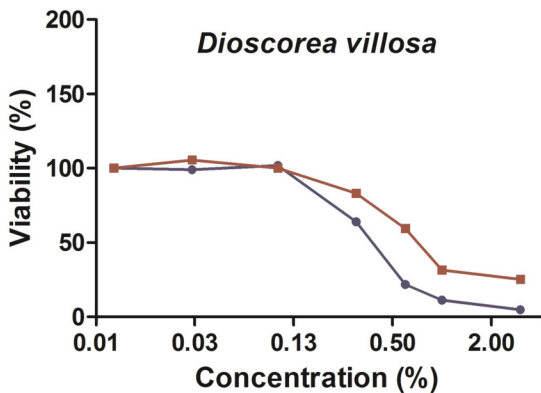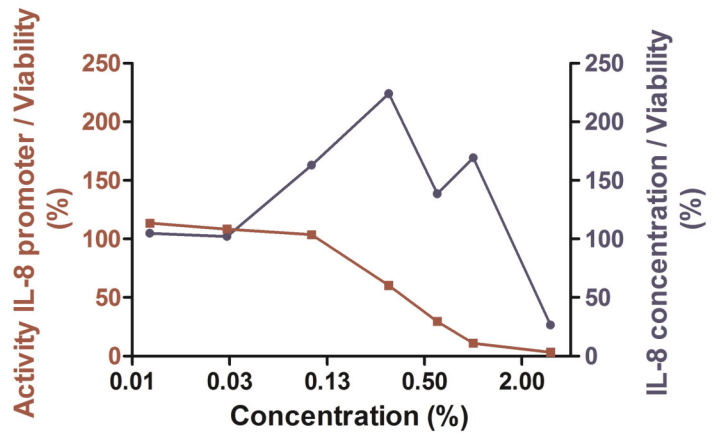

HeLa-TLR4  
THP-1

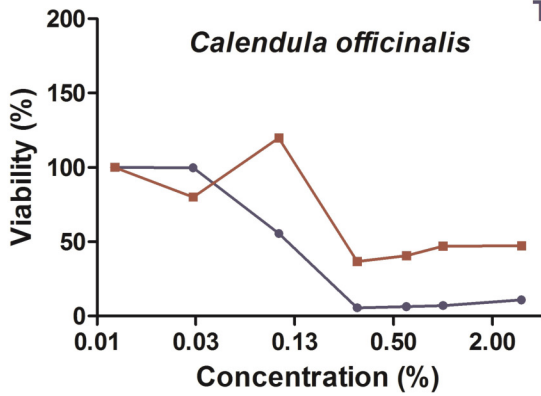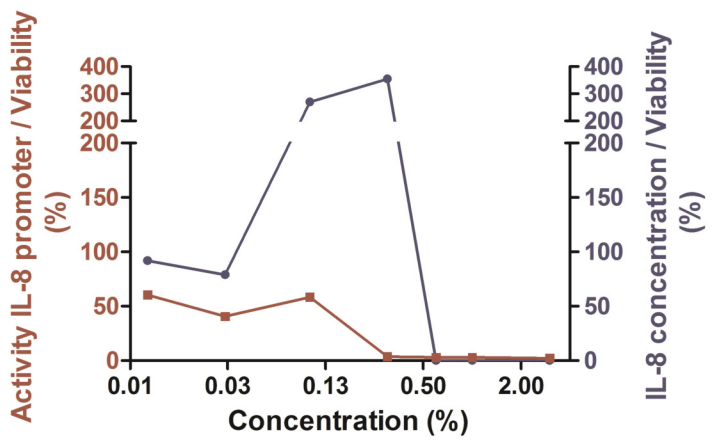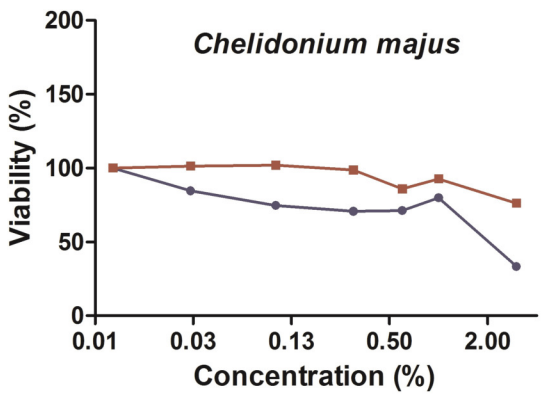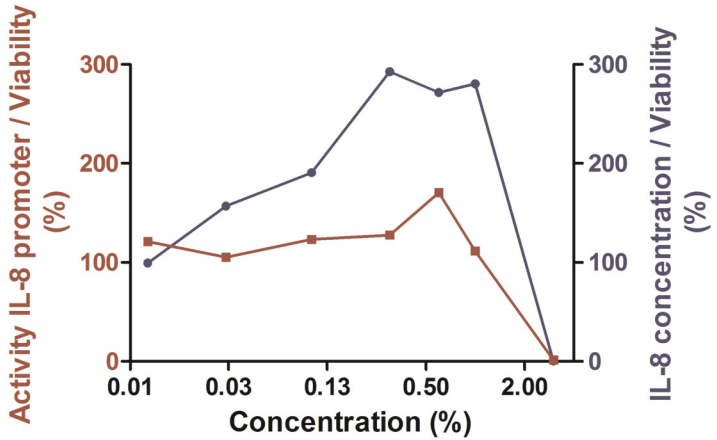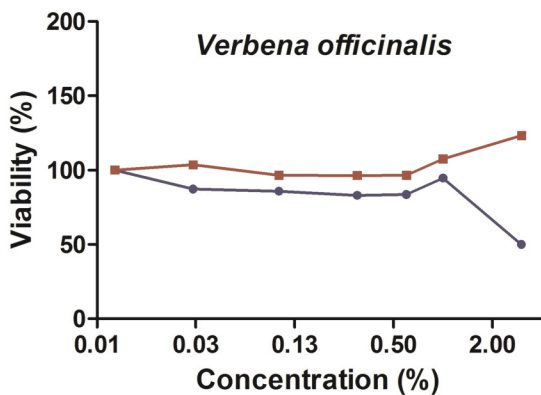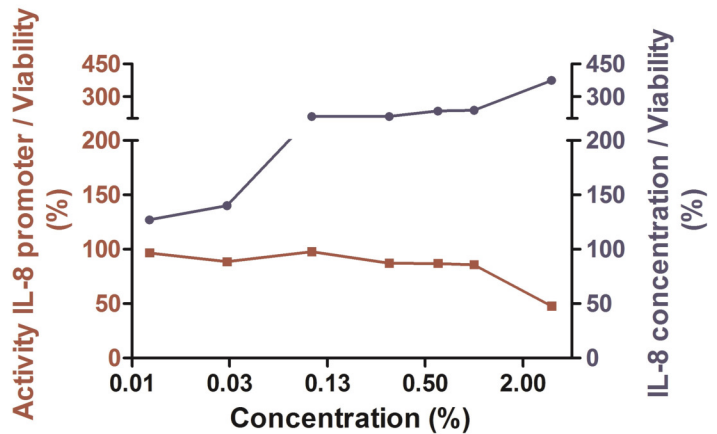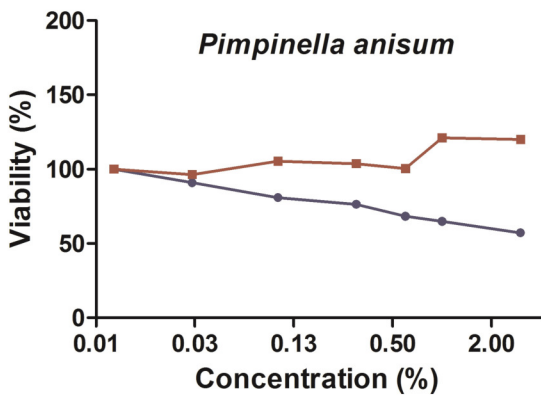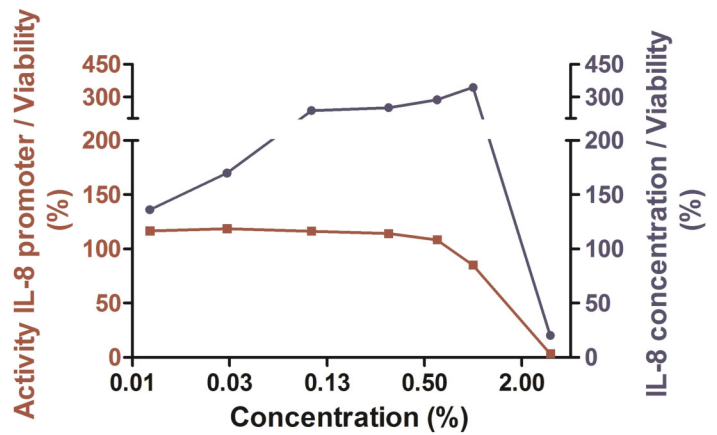

HeLa-TLR4  
THP-1

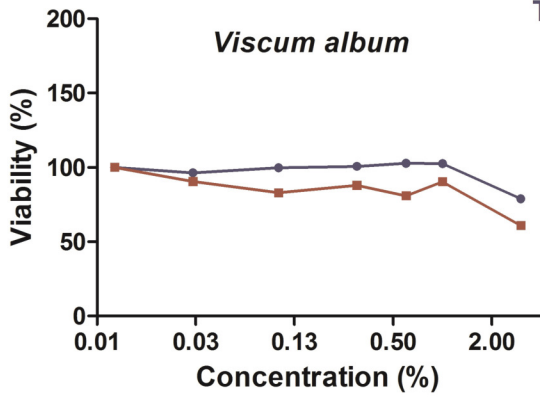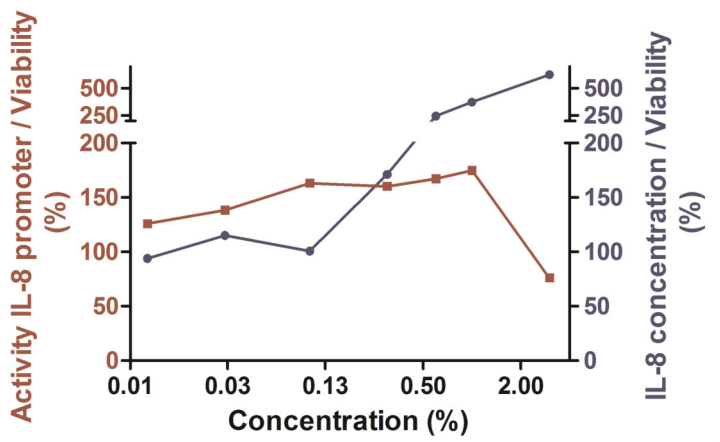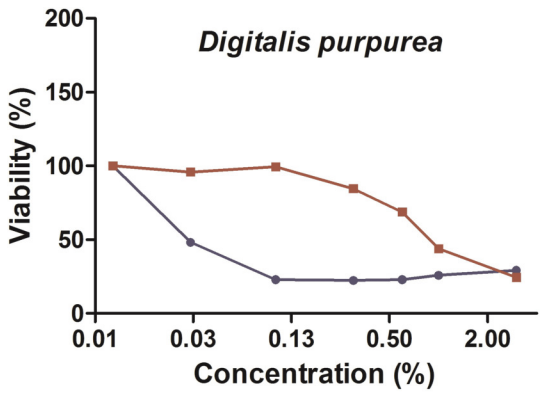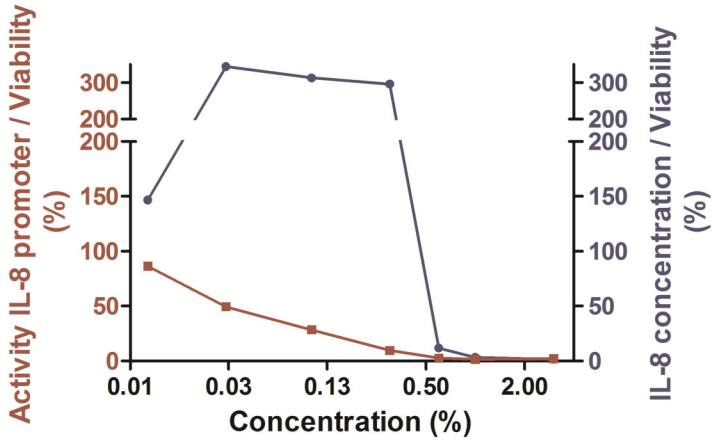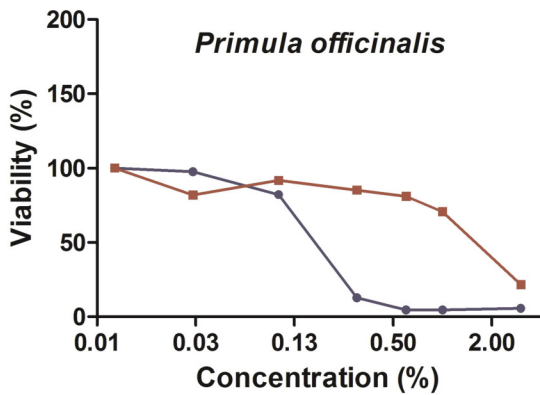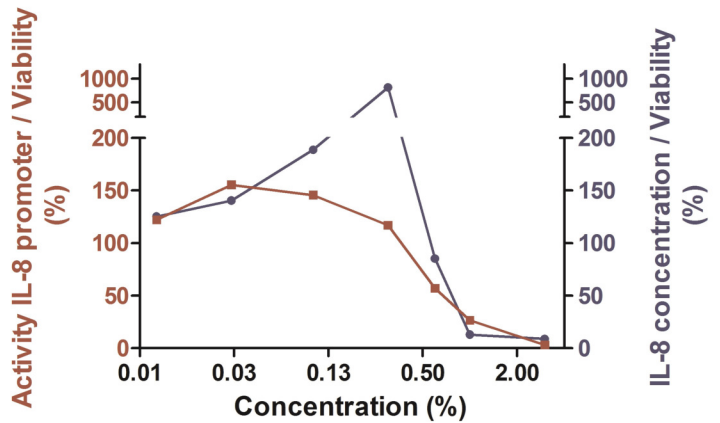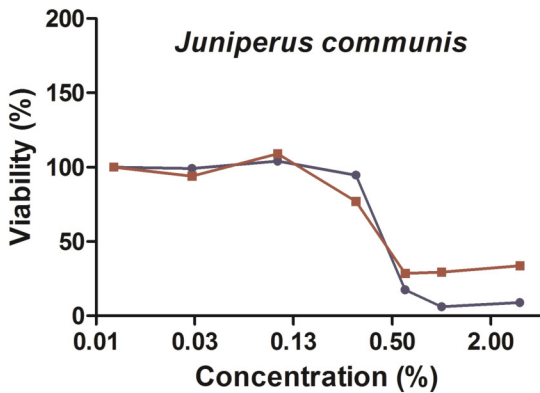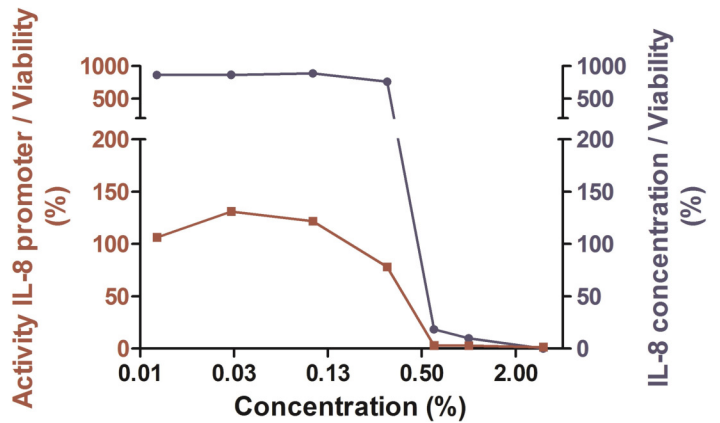

HeLa-TLR4  
THP-1

*Aesculus hippocastanum*

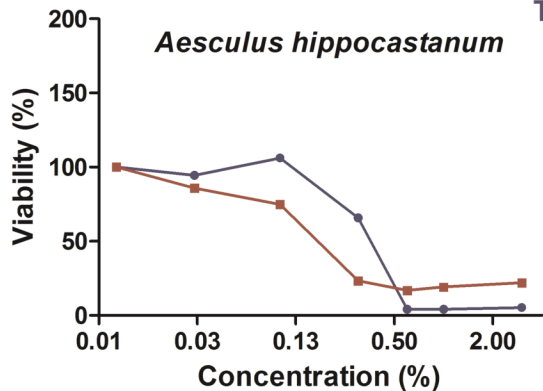

Activity IL-8 promoter / Viability (%)

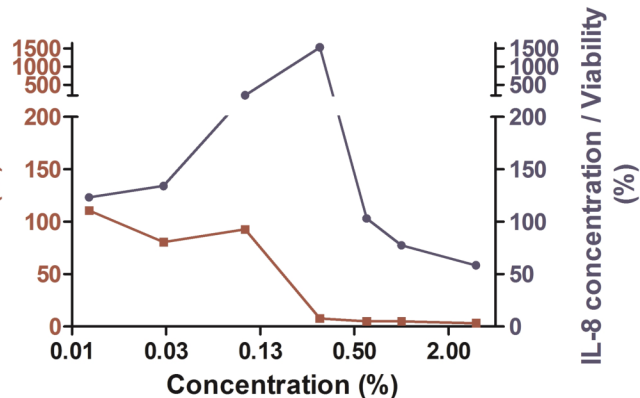

*Primula vulgaris*

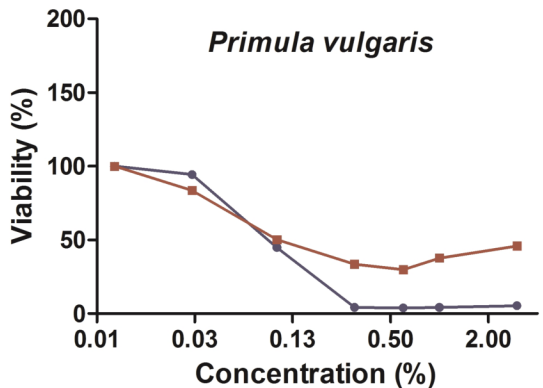

Activity IL-8 promoter / Viability (%)

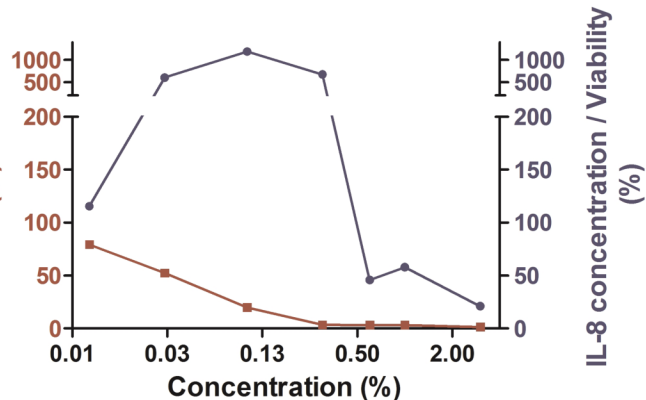

Supplement: pone.0203907.s002.pdf [file pone.0203907.s002.pdf]
