# Supplementary material for: Screening of herbal extracts for TLR2- and TLR4-dependent anti-inflammatory effects
Source: PubMed Central journal article supplement (PMC6181297; doi:10.1371/journal.pone.0203907), 2018-10-11
Supplement: pone.0203907.s001.pdf [file pone.0203907.s001.pdf]

| Latin name                    | Common English name  | Common German name         | Family                  | Active compound                | Compound classification | Influence on (inflammatory) marker                                                            | Beneficial human health effect                                  | Reference                                                                                  |
|-------------------------------|----------------------|----------------------------|-------------------------|--------------------------------|-------------------------|-----------------------------------------------------------------------------------------------|-----------------------------------------------------------------|--------------------------------------------------------------------------------------------|
| <i>Achillea millefolium</i>   | Common yarrow        | Gemeine Schafgarbe         | <i>Asteraceae</i>       | Kaempferol, luteolin, apigenin | Flavonoids              | ↓ ALT, ↓ AST, ↑ GSH, ↓ MPO, ↑ SOD                                                             | Ameliorating several neuro-degenerative disorders               | Potrich et al., 2010; Yaesh et al., 2006; Ayoobi et al., 2017                              |
| <i>Aesculus hippocastanum</i> | Horse-chestnut       | Gewöhnliche Rosskastanie   | <i>Sapindaceae</i>      | Escin                          | Saponin                 | ↓ IκBα, ↓ NF-κB, ↑ ROS                                                                        | Prolongation of survival in thyroid cancer patients             | Cheong et al., 2018                                                                        |
| <i>Alchemilla vulgaris</i>    | Common lady's mantle | Spitzlappiger Frauenmantel | <i>Rosaceae</i>         |                                |                         |                                                                                               | Weight loss (when combined with other plants)                   | Said et al., 2011                                                                          |
| <i>Allium sativum</i>         | Garlic               | Knoblauch                  | <i>Amaryllidaceae</i>   | Diallyl sulfide                | Sulfide                 | ↓ ALT, ↓ AST, ↓ COX-2, ↓ IL-1β, ↓ iNOS, ↑ insulin, ↓ NF-κB, ↓ TNF-α                           | Reduction of body fat mass and body weight                      | Eidi et al., 2006; Soleimani et al., 2016; Suman and Shukla, 2016                          |
| <i>Aloe ferox</i>             | Aloe                 | Aloen                      | <i>Xanthorrhoeaceae</i> | Aloeresin I                    | Glucoside               | ↓ caspase-1, ↓ COX-1, ↓ ERK, ↓ IL-1β, ↓ IL-6, ↓ IL-8, ↓ JNK, ↓ NF-κB, ↓ NLRP3, ↓ p38, ↓ TNF-α | Wound healing                                                   | Speranza et al., 2005; Fawole et al., 2010; Budai et al., 2013; Radha and Laxmipriya, 2014 |
| <i>Alpinia officinarum</i>    | Galangal             | Galgant                    | <i>Zingiberaceae</i>    | Galangin                       | Flavonoid               | ↓ IL-6, ↑ IL-10, ↓ NO, ↓ ROS, ↓ TNF-α                                                         |                                                                 | Choi et al., 2017                                                                          |
| <i>Althaea officinalis</i>    | Common marshmallow   | Eibisch                    | <i>Malvaceae</i>        |                                |                         |                                                                                               | Treatment of Old World cutaneous leishmaniasis; Cough reduction | Cravotto et al., 2010                                                                      |

| Latin name                     | Common English name | Common German name      | Family              | Active compound | Compound classification            | Influence on (inflammatory) marker                                                                                     | Beneficial human health effect                                                         | Reference                                                                                  |
|--------------------------------|---------------------|-------------------------|---------------------|-----------------|------------------------------------|------------------------------------------------------------------------------------------------------------------------|----------------------------------------------------------------------------------------|--------------------------------------------------------------------------------------------|
| <i>Arctostaphylos uva-ursi</i> | Bearberry           | Bärentrauben            | <i>Ericaceae</i>    | Arbutin         | Glucoside                          | ↓ COX-2,<br>↓ IL-1 $\beta$ , ↓ iNOS,<br>↓ NF- $\kappa$ B, ↓ NO,<br>↓ TNF- $\alpha$                                     |                                                                                        | Lee and Kim, 2012                                                                          |
| <i>Armoracia rusticana</i>     | Horseradish         | Meerrettich             | <i>Brassicaceae</i> |                 |                                    | ↓ c-Jun,<br>↓ COX-2,<br>↓ ERK1/2,<br>↓ IL-6, ↓ NO,<br>↓ PGE <sub>2</sub> , ↓ TNF- $\alpha$                             |                                                                                        | Marzocco et al., 2015; Herz et al., 2017                                                   |
| <i>Arnica montana</i>          | Arnica              | Arnika                  | <i>Asteraceae</i>   | Helenalin       | Sesquiterpene                      | ↓ IL-1 $\beta$ , ↓ IL-6,<br>↓ IL-12,<br>↓ NF- $\kappa$ B, ↓ NO,<br>↓ TNF- $\alpha$                                     | Osteoarthritis                                                                         | Lass et al., 2008; Chahal et al., 2013; Dragos et al., 2017                                |
| <i>Artemisia absinthium</i>    | Wormwood            | Wermutkraut             | <i>Asteraceae</i>   |                 | Flavonoids                         | ↓ COX-2,<br>↓ iNOS,<br>↓ NF- $\kappa$ B, ↓ NO,<br>↓ PGE <sub>2</sub> , ↓ TNF- $\alpha$                                 | Crohn's disease                                                                        | Lee et al., 2004; Omer et al., 2007; Krebs et al., 2010                                    |
| <i>Avena sativa</i>            | Oat                 | Saat-Hafer              | <i>Poaceae</i>      | $\beta$ -Glucan | Glucan                             | ↓ COX-2, ↓ NO,<br>↑ TGF $\beta$ 1,<br>↓ TNF- $\alpha$                                                                  | Anti-diabetic, prevention of cardiovascular diseases, protection against breast cancer | Singh et al., 2013                                                                         |
| <i>Boswellia carterii</i>      | Frankincense        | Afrikanischer Weihrauch | <i>Burseraceae</i>  | Boswellic acid  | Triterpene                         | ↓ 5-LOX,<br>↓ AChE, ↑ GSH,<br>↓ MDA                                                                                    |                                                                                        | Safayhi et al., 2000; Ebrahimpour et al., 2017                                             |
| <i>Boswellia serrata</i>       | Frankincense        | Weihrauch               | <i>Burseraceae</i>  | Boswellic acid  | Triterpene                         | ↓ 5-LOX, ↓ IFN $\gamma$ ,<br>↓ IL-1 $\beta$ , ↓ IL-2,<br>↑ IL-4, ↓ IL-6,<br>↑ IL-10, ↓ IL-12,<br>↓ NO, ↓ TNF- $\alpha$ | Osteoarthritis                                                                         | Safayhi et al., 2000; Gayathri et al., 2007; Dragos et al., 2017                           |
| <i>Calendula officinalis</i>   | Marigold            | Ringelblume             | <i>Asteraceae</i>   |                 | Several triterpenes and flavonoids | ↓ COX-2,<br>↓ IL-1( $\beta$ ),<br>↓ TNF- $\alpha$                                                                      | Wound healing; Prevention of acute dermatitis                                          | Ukiya et al., 2006; Cravotto et al., 2010; Kirichenko et al., 2016; Alexandre et al., 2017 |

| Latin name                    | Common English name | Common German name | Family               | Active compound                                                       | Compound classification  | Influence on (inflammatory) marker                                 | Beneficial human health effect                                                                            | Reference                                                                                   |
|-------------------------------|---------------------|--------------------|----------------------|-----------------------------------------------------------------------|--------------------------|--------------------------------------------------------------------|-----------------------------------------------------------------------------------------------------------|---------------------------------------------------------------------------------------------|
| <i>Camellia sinensis</i> (L.) | Green tea           | Grüner Tee         | <i>Theaceae</i>      | EGCG                                                                  | Flavonoid                | ↓ COX-2, ↓ IFN $\gamma$ , ↓ NF- $\kappa$ B, ↑ ROS, ↓ TNF- $\alpha$ | Metabolism, cardiovascular system, neuro-degenerative diseases and cancer                                 | Cooper et al., 2005; Arab et al., 2009; Shirakami et al., 2016                              |
| <i>Capsicum frutescens</i>    | Chili               | Chili              | <i>Solanaceae</i>    | Capsaicin                                                             | Polyunsaturated alkamide | ↓ AP-1, ↓ I $\kappa$ B $\alpha$ , ↓ NF- $\kappa$ B                 | Pain reduction                                                                                            | Han et al., 2001; Bortolotti and Porta, 2011; Gagnier et al., 2016                          |
| <i>Carum carvi</i>            | Caraway             | Echter Kümmel      | <i>Apiaceae</i>      |                                                                       |                          | ↓ cholesterol, ↓ triglycerides                                     | Anti-obesity                                                                                              | Lemhadri et al., 2006; Kazemipoor et al., 2013                                              |
| <i>Castanea sativa</i>        | Sweet chestnut      | Edelkastanie       | <i>Fagaceae</i>      |                                                                       | Phenols                  | ↓ NF- $\kappa$ B, ↓ RAGE, ↓ O $_2^{\cdot-}$ , ↓ $\cdot$ OH         |                                                                                                           | Calliste et al., 2005; Jovanović et al., 2017                                               |
| <i>Chelidonium majus</i>      | Celandine           | Schöllkraut        | <i>Papaveraceae</i>  | Berberine, norchelidonine, chelidonine, 8-hydroxydihydro-sanguinarine | Alkaloids                | ↓ COX-2, ↓ iNOS, ↓ NO, ↓ PGE $_2$                                  | Anticancer drug (Ukrain) based on plant extract                                                           | Kuo et al., 2004; Ernst and Schmidt, 2005; Park et al., 2011                                |
| <i>Chlorella pyrenoidosa</i>  | Chlorella           | Chlorella          | <i>Chlorellaceae</i> | Rhamnose, glucose, galactose, mannose, xylose                         | Mono-saccharides         | ↑ IL-1 $\beta$                                                     | Pregnant and breastfeeding women                                                                          | Nakano et al., 2007; Nakano et al., 2010; Chahal et al., 2013                               |
| <i>Cinchona pubescens</i>     | Cinchona            | Chinarinde         | <i>Rubiaceae</i>     | Quinine                                                               | Quinoline                | ↓ NF- $\kappa$ B                                                   | Malaria treatment                                                                                         | An et al., 2017                                                                             |
| <i>Cinnamomum verum</i>       | Cinnamon            | Zimt               | <i>Lauraceae</i>     | Cinnamaldehyde                                                        | Flavonoid                | ↓ I $\kappa$ B, ↓ iNOS, ↓ MyD88, ↓ NF- $\kappa$ B, ↓ TNF- $\alpha$ | Anti-hyperlipidaemic and blood pressure lowering, stimulation of glycogen synthesis and insulin secretion | Khan et al., 2003; Kanuri et al., 2009; Hariri and Ghiasvand, 2016; Ranasinghe et al., 2017 |

| Latin name                                 | Common English name | Common German name | Family                | Active compound                                       | Compound classification | Influence on (inflammatory) marker                                                                 | Beneficial human health effect                                                        | Reference                                                                                                 |
|--------------------------------------------|---------------------|--------------------|-----------------------|-------------------------------------------------------|-------------------------|----------------------------------------------------------------------------------------------------|---------------------------------------------------------------------------------------|-----------------------------------------------------------------------------------------------------------|
| <i>Coriandrum sativum</i>                  | Coriander           | Echter Koriander   | <i>Apiaceae</i>       |                                                       |                         | ↓ COX-2, ↓ IL-1β, ↓ iNOS, ↓ NO, ↓ PGE <sub>2</sub>                                                 | Reduction of UV-induced erythema                                                      | Reuter et al., 2008; Wu et al., 2010                                                                      |
| <i>Crataegus species</i>                   | Hawthorn            | Weißdorn           | <i>Rosaceae</i>       | Vitexin                                               | Flavonoid               | ↓ IL-1(β), ↑ IL-10, ↓ NO, ↓ p-ERK1/2, ↓ PGE <sub>2</sub> , ↓ p-JNK, ↓ p-p38, ↓ TNF-α               | Adjunctive treatment for chronic heart failure; Hypotensive and hypolipidemic effects | Pittler et al., 2003; Walker et al., 2006; Dalli et al., 2011; Kirichenko et al., 2016; Rosa et al., 2016 |
| <i>Curcuma longa</i>                       | Turmeric            | Kurkuma            | <i>Zingiberaceae</i>  | Curcumin                                              | Catechol                | ↓ AP-1, ↓ COX-2, ↓ IFNγ, ↓ IL-1, ↓ IL-6, ↓ IL-8, ↓ IL-12, ↓ iNOS, ↓ JNK, ↓ NF-κB, ↓ RANKL, ↓ TNF-α | Suppression of IBD symptoms; Osteoarthritis                                           | Joe et al., 2004; Goel et al., 2008; Pari et al., 2008; Baliga et al., 2012; Dragos et al., 2017          |
| <i>Cynara scolymus</i>                     | Artichoke           | Artischocken       | <i>Asteraceae</i>     |                                                       |                         | ↓ CRP, ↓ Fg, ↓ MDA                                                                                 | Decreased cholesterol level                                                           | Bundy et al., 2008; Ben Salem et al., 2017                                                                |
| <i>Daucus carota</i> subsp. <i>sativus</i> | Carrot              | Karotte            | <i>Apiaceae</i>       | <i>trans</i> -Asarone<br>2,4,5-Trimethoxybenzaldehyde | Anisole<br>Benzaldehyde | ↓ COX-2                                                                                            |                                                                                       | Momin et al., 2003                                                                                        |
| <i>Digitalis purpurea</i>                  | Common foxglove     | Roter Fingerhut    | <i>Plantaginaceae</i> | Digoxin                                               | Digitalis glycoside     |                                                                                                    | Cardiac disorders                                                                     | Hauptman and Kelly, 1999                                                                                  |
| <i>Dioscorea villosa</i>                   | Yam                 | Yams               | <i>Dioscoreaceae</i>  | Diosgenin                                             | Cholestane              | ↓ p-AKT, ↓ p-ERK, ↓ p-JNK, ↓ p-p38, ↓ ROS, ↓ TNF-α                                                 |                                                                                       | Choi et al., 2010                                                                                         |
| <i>Echinacea purpurea</i>                  | Purple coneflower   | Purpur-Sonnenhut   | <i>Asteraceae</i>     |                                                       | Alkamides               | ↓ COX-1, ↓ COX-2, ↓ IL-1β, ↓ IL-6, ↓ IL-8, ↓ NO, ↓ TNF-α                                           |                                                                                       | Senchina et al., 2006; Woelkart and Bauer, 2007; Sharma et al., 2009                                      |

| Latin name                   | Common English name | Common German name        | Family               | Active compound        | Compound classification | Influence on (inflammatory) marker                                                                                 | Beneficial human health effect                           | Reference                                                                           |
|------------------------------|---------------------|---------------------------|----------------------|------------------------|-------------------------|--------------------------------------------------------------------------------------------------------------------|----------------------------------------------------------|-------------------------------------------------------------------------------------|
| <i>Elettaria cardamomum</i>  | Cardamom            | Kardamom                  | <i>Zingiberaceae</i> | Cardamonin             | Flavonoid               | ↓ COX-2,<br>↓ IL-1 $\beta$ , ↓ IL-6,<br>↓ iNOS,<br>↓ NF- $\kappa$ B, ↓ NO,<br>↓ PGE <sub>2</sub> , ↓ TNF- $\alpha$ |                                                          | Prasad and Aggarwal, 2014                                                           |
| <i>Equisetum arvense</i>     | Field horsetail     | Acker-Schachtelhalm       | <i>Equisetaceae</i>  | Kynurenic acid         | Quinoline               | ↓ IFN $\gamma$ , ↓ TNF- $\alpha$                                                                                   | Rheumatoid arthritis                                     | Gründemann et al., 2014; Dragos et al., 2017                                        |
| <i>Erythraea centaurium</i>  | Common centaury     | Echtes Tausendgüldenkraut | <i>Gentianaceae</i>  |                        |                         | ↓ ALT, ↓ AST,<br>↓ LDH                                                                                             |                                                          | Mroueh et al., 2004                                                                 |
| <i>Euphrasia officinalis</i> | Eyebright           | Gemeiner Augentrost       | <i>Orobanchaceae</i> |                        |                         | ↓ IL-1 $\beta$ , ↓ IL-6,<br>↓ TNF- $\alpha$                                                                        |                                                          | Paduch et al., 2014                                                                 |
| <i>Filipendula ulmaria</i>   | Meadowsweet         | Mädesüß                   | <i>Rosaceae</i>      | Quercetin              | Flavonoid               | ↓ COX-1,<br>↓ COX-2,<br>↓ IL-1 $\beta$ , ↓ IL-6,<br>↓ TNF- $\alpha$                                                |                                                          | Drummond et al., 2013; Katanić et al., 2016                                         |
| <i>Foeniculum vulgare</i>    | Fennel              | Fenchel                   | <i>Apiaceae</i>      | Limonene               | Cyclohexene             | ↓ IL-6, ↓ LDH,<br>↓ NO, ↓ p-ERK,<br>↓ TNF- $\alpha$                                                                |                                                          | Lee et al., 2015                                                                    |
|                              |                     |                           |                      | <i>trans</i> -Anethole | Anisole                 |                                                                                                                    |                                                          |                                                                                     |
| <i>Fucus vesiculosus</i>     | Bladderwrack        | Blasentang                | <i>Fucaceae</i>      | Fucoidan               | Polysaccharide          | ↓ COX-2, ↓ NO                                                                                                      |                                                          | Lim et al., 2015                                                                    |
| <i>Gentiana lutea</i>        | Gentian             | Enzian                    | <i>Gentianaceae</i>  | Gentiopicroside        | Glucoside               | ↓ ERK 1/2,<br>↓ iNOS, ↓ MPO,<br>↓ NO                                                                               |                                                          | Nastasijević et al., 2012; Kesavan et al., 2013                                     |
| <i>Geranium robertianum</i>  | Herb robert         | Ruprechtskraut            | <i>Geraniaceae</i>   |                        |                         | ↓ NO                                                                                                               |                                                          | Catarino et al., 2017                                                               |
| <i>Ginkgo biloba</i>         | Ginkgo              | Ginkgo                    | <i>Ginkgoaceae</i>   | Bilobalide             | Ginkgolide              | ↓ ERK1/2                                                                                                           | Enhancing certain neuro-psychological / memory processes | Mix and Crews, 2002; Dodge et al., 2008; Weinmann et al., 2010; Chahal et al., 2013 |
| <i>Glycyrrhiza glabra</i>    | Liquorice           | Süßholz                   | <i>Fabaceae</i>      | Isoliquiritigenin      | Flavonoid               | ↓ COX-2,<br>↓ iNOS, ↓ IRF3,<br>↓ NF- $\kappa$ B                                                                    | Decrease of mucositis and oral mucosal irritation        | Park and Youn, 2010; Najafi et al., 2017                                            |

| Latin name                      | Common English name | Common German name         | Family                | Active compound                    | Compound classification          | Influence on (inflammatory) marker                                                                           | Beneficial human health effect   | Reference                                                                                              |
|---------------------------------|---------------------|----------------------------|-----------------------|------------------------------------|----------------------------------|--------------------------------------------------------------------------------------------------------------|----------------------------------|--------------------------------------------------------------------------------------------------------|
| <i>Hamamelis virginiana</i>     | Witch hazel         | Hamamelis                  | <i>Hamamelidaceae</i> | Hamamelitannin                     | Benzoate                         | ↓ TNF-α                                                                                                      | Erythema suppression             | Hughes-Formella et al., 1998; Habtemariam, 2002                                                        |
| <i>Harpagophytum procumbens</i> | Devil's claw        | Afrikanische Teufelskralle | <i>Pedaliaceae</i>    | Harpagoside, harpagide, procumbide | Iridoid glycosides               | ↓ c-FOS, ↓ COX-2, ↓ IL-1β, ↓ iNOS, ↓ NF-κB, ↓ TNF-α                                                          | Osteoarthritis and low back pain | Gagnier et al., 2004; Rodriguez Villanueva et al., 2016; Dragos et al., 2017                           |
| <i>Hedera helix</i>             | Common ivy          | Efeu                       | <i>Araliaceae</i>     | α-Hederin                          | Saponin                          | ↓ IL-17                                                                                                      |                                  | Ebrahimi et al., 2016                                                                                  |
| <i>Hibiscus sabdariffa</i>      | Roselle             | Roselle                    | <i>Malvaceae</i>      |                                    | Polyphenols                      | ↓ COX-2, ↓ ERK1/2, ↓ IFNγ, ↓ IL-6, ↑ IL-10, ↓ JNK, ↓ NF-κB, ↓ NO, ↓ p38, ↓ PGE <sub>2</sub> , ↓ ROS, ↓ TNF-α |                                  | Da-Costa-Rocha et al., 2014; Herranz-López et al., 2017                                                |
| <i>Humulus lupulus</i>          | Hops                | Hopfen                     | <i>Cannabaceae</i>    | Xanthohumol                        | Flavonoid                        | ↓ IL-1β, ↓ MCP-1, ↓ NF-κB, ↓ NO, ↓ TNF-α                                                                     |                                  | Lupinacci et al., 2009; Lee et al., 2011                                                               |
| <i>Hypericum perforatum</i>     | St John's wort      | Echtes Johanniskraut       | <i>Hypericaceae</i>   | Pseudohypericin                    | Benz(a)-anthracene<br>Flavonoids | ↓ COX-2, ↓ IL-1, ↓ IL-6, ↓ NO, ↓ PGE <sub>2</sub> , ↓ TNF-α                                                  | Depression                       | Schulz, 2006; Kasper et al., 2010; Huang et al., 2012; Kirichenko et al., 2016; Bonaterra et al., 2018 |
| <i>Ilex paraguariensis</i>      | Yerba mate          | Mate-Strauch               | <i>Aquifoliaceae</i>  | Chlorogenic acid<br>Quercetin      | Cyclohexane<br>Flavonoid         | ↓ COX-2, ↑ IκBα, ↓ iNOS, ↓ NF-κB, ↓ TNF-α                                                                    |                                  | Arçari et al., 2011; Bracesco et al., 2011; Pimentel et al., 2013                                      |
| <i>Juniperus communis</i>       | Common juniper      | Gemeiner Wacholder         | <i>Cupressaceae</i>   | Amentoflavone                      | Flavonoid                        | ↓ ALT, ↓ ALP, ↓ AST, ↓ TNF-α                                                                                 |                                  | Bais et al., 2017                                                                                      |
| <i>Marrubium vulgare</i>        | Common horehound    | Andornkraut                | <i>Lamiaceae</i>      | Marrubiin                          | Diterpene                        | ↓ COX-2                                                                                                      |                                  | Sahpaz et al., 2002; Meyre-Silva et al., 2005                                                          |

| Latin name                    | Common English name | Common German name | Family                | Active compound | Compound classification    | Influence on (inflammatory) marker                                                                            | Beneficial human health effect                                                      | Reference                                                                          |
|-------------------------------|---------------------|--------------------|-----------------------|-----------------|----------------------------|---------------------------------------------------------------------------------------------------------------|-------------------------------------------------------------------------------------|------------------------------------------------------------------------------------|
| <i>Matricaria chamomilla</i>  | Chamomile           | Kamille            | <i>Asteraceae</i>     | Apigenin        | Flavonoid                  | ↓ IL-1 $\beta$ , ↓ IL-6, ↓ TNF- $\alpha$                                                                      |                                                                                     | Drummond et al., 2013                                                              |
| <i>Melilotus officinalis</i>  | Sweet clover        | Steinklee Kraut    | <i>Fabaceae</i>       | Caffeic acid    | Cinnamate                  | ↓ COX-2, ↓ IL-6, ↓ iNOS, ↓ NF- $\kappa$ B, ↓ NO, ↓ PGE <sub>2</sub> , ↓ TNF- $\alpha$                         |                                                                                     | Bazazzadegan et al., 2017; Liu et al., 2018                                        |
| <i>Melissa officinalis</i>    | Lemon balm          | Zitronenmelisse    | <i>Lamiaceae</i>      | Rosmarinic acid | Benzoate                   | ↓ IL-1 $\beta$ , ↓ IL-6, ↓ IRAK1, ↓ MyD88, ↓ TLR4, ↓ TNF- $\alpha$ , ↓ TRAF6                                  |                                                                                     | Jiang et al., 2017; Chizzola et al., 2018                                          |
| <i>Mentha piperita</i>        | Peppermint          | Pfefferminze       | <i>Lamiaceae</i>      |                 |                            | ↓ PGE <sub>2</sub> , ↓ NO                                                                                     |                                                                                     | Sun et al., 2014                                                                   |
| <i>Origanum majorana</i>      | Marjoram            | Majoran            | <i>Lamiaceae</i>      | Rosmarinic acid | Benzoate                   | ↓ IL-1 $\beta$ , ↓ IL-6, ↓ TNF- $\alpha$                                                                      |                                                                                     | Villalva et al., 2018                                                              |
| <i>Panax ginseng</i>          | Ginseng             | Ginseng            | <i>Araliaceae</i>     | Ginsan          | Polysaccharide<br>Saponins | ↓ COX-2, ↓ IFN $\gamma$ , ↓ IL-1 $\beta$ , ↓ IL-6, ↓ IL-12, ↓ IL-18, ↓ iNOS, ↓ MyD88, ↓ TLR4, ↓ TNF- $\alpha$ | Osteoarthritis; Improvement of glucose metabolism and modulating of immune response | Kang and Min, 2012; Chahal et al., 2013; Shergis et al., 2013; Dragos et al., 2017 |
| <i>Petroselinum crispum</i>   | Parsley             | Petersilie         | <i>Apiaceae</i>       | Apigenin        | Flavonoid                  | ↓ NO                                                                                                          | Increase in anti-oxidant enzymes                                                    | Nielsen et al., 1999; Farzaei et al., 2013                                         |
| <i>Pimpinella anisum</i>      | Anise               | Anis               | <i>Apiaceae</i>       | Anethole        | Anisole                    | ↓ AP-1, ↑ IL-10, ↓ NF- $\kappa$ B, ↓ p38, ↓ TNF- $\alpha$                                                     |                                                                                     | Aprotosoai et al., 2016                                                            |
| <i>Plantago lanceolata</i>    | Ribwort             | Spitzwegerich      | <i>Plantaginaceae</i> | Acteoside       | Phenol glycoside           | (↓ COX-1), (↓ COX-2), ↓ IL-8, ↓ iNOS, ↓ MCP-1, ↓ NO                                                           |                                                                                     | Murai et al., 1995; Vigo et al., 2005; Fakhruddin et al., 2017                     |
| <i>Rheum palmatum</i>         | Rhubarb             | Rhabarber          | <i>Polygonaceae</i>   | Rhein, emodin   | Anthraquinones             | ↓ TNF- $\alpha$                                                                                               |                                                                                     | Chahal et al., 2013                                                                |
| <i>Rosmarinus officinalis</i> | Rosemary            | Rosmarin           | <i>Lamiaceae</i>      | Rosmarinic acid | Benzoate                   | ↓ IL-1 $\beta$ , ↓ IL-6, ↑ NF- $\kappa$ B, ↓ TNF- $\alpha$                                                    |                                                                                     | Rocha et al., 2015                                                                 |

| Latin name                      | Common English name   | Common German name          | Family               | Active compound                     | Compound classification           | Influence on (inflammatory) marker                               | Beneficial human health effect                                             | Reference                                                                                          |
|---------------------------------|-----------------------|-----------------------------|----------------------|-------------------------------------|-----------------------------------|------------------------------------------------------------------|----------------------------------------------------------------------------|----------------------------------------------------------------------------------------------------|
| <i>Rubus fruticosus</i>         | Blackberry            | Brombeere                   | <i>Rosaceae</i>      | Cyanidin-3-O-glucoside              | Anthocyanin                       | ↓ iNOS, ↓ NF-κB, ↓ NO                                            |                                                                            | Pergola et al., 2006; Zia-UI-Haq et al., 2014                                                      |
| <i>Salix alba</i>               | White willow          | Silber-Weide                | <i>Salicaceae</i>    | Salicin                             | Glucoside                         | ↓ COX-2, ↓ IL-6, ↓ NF-κB, ↓ TNF-α                                | Pain relief                                                                | Drummond et al., 2013; Shara and Stohs, 2015; Dragos et al., 2017                                  |
| <i>Salvia officinalis</i>       | Salvia                | Salbei                      | <i>Lamiaceae</i>     |                                     | Different flavonoids and terpenes | ↓ MDA, ↓ NF-κB, ↓ NO, ↓ TNF-α                                    |                                                                            | Ghorbani and Esmailizadeh, 2017; Kolac et al., 2017                                                |
| <i>Sambucus nigra</i> (L.)      | Elderflowers          | Holunder                    | <i>Adoxaceae</i>     |                                     | Anthocyanins                      | ↓ IFNγ, ↓ IL-1, ↓ TNF-α                                          |                                                                            | Badescu et al., 2015; Kirichenko et al., 2016                                                      |
| <i>Schinus terebinthifolius</i> | Brazilian pepper tree | Brasilianischer Pfefferbaum | <i>Anacardiaceae</i> |                                     |                                   | ↓ CXCL1, ↓ IL-1β, ↓ IL-6, ↓ TNF-α                                | Reduction of gingival inflammation                                         | Freires et al., 2013; Rosas et al., 2015                                                           |
| <i>Spirulina</i>                | Spirulina             | Spirulina                   | <i>Spirulinaceae</i> | Phycocyanin                         | Phycobiliprotein                  | ↓ IL-6, ↑ Nrf2, ↓ TNF-α                                          |                                                                            | Khafaga and El-Sayed, 2018; Kim et al., 2018                                                       |
| <i>Symphytum officinale</i>     | Comfrey               | Echter Beinwell             | <i>Boraginaceae</i>  | Rosmarinic acid<br>Salvianolic acid | Benzoate<br>Cinnamate             | ↓ IL-1β, ↓ IL-6, ↓ NF-κB, ↓ NO, ↓ TNF-α                          | Reduction of pain, inflammation and swelling                               | Koll et al., 2004; Giannetti et al., 2010; Staiger, 2013; Dragos et al., 2017; Trifan et al., 2018 |
| <i>Syzygium aromaticum</i>      | Clove                 | Nelken                      | <i>Myrtaceae</i>     | Eugenol                             | Cinnamate                         | ↓ COX-2, ↓ NF-κB                                                 | Local anti-inflammatory, antiseptic, and anesthetic effects on dental pulp | Fujisawa and Murakami, 2016                                                                        |
| <i>Tanacetum parthenium</i>     | Feverfew              | Mutterkraut                 | <i>Asteraceae</i>    | Tanetin<br>Parthenolide             | Flavonoid<br>Sesquiterpene        | ↓ 5-LOX, ↓ COX-2, ↓ IL-6, ↓ IL-8, ↓ iNOS, ↓ NF-κB, ↓ NO, ↓ TNF-α |                                                                            | Williams et al., 1995; Mazor et al., 2000; Aviram et al., 2012; Magni et al., 2012                 |
| <i>Taraxacum officinale</i>     | Dandelion             | Löwenzahn                   | <i>Asteraceae</i>    | Taraxinic acid β-d-glucopyranosyl   | Sesquiterpene                     | ↑ Hmox1, ↓ iNOS,                                                 |                                                                            | Liu et al., 2014; Esatbeyoglu et al.,                                                              |



| Latin name                        | Common English name                    | Common German name      | Family                | Active compound                        | Compound classification | Influence on (inflammatory) marker                                                            | Beneficial human health effect                               | Reference                                                                                            |
|-----------------------------------|----------------------------------------|-------------------------|-----------------------|----------------------------------------|-------------------------|-----------------------------------------------------------------------------------------------|--------------------------------------------------------------|------------------------------------------------------------------------------------------------------|
| <i>Thymus vulgaris</i>            | Common thyme                           | Thymian                 | <i>Lamiaceae</i>      | ester<br>Thymol                        | Monoterpene             | ↓ NF-κB, ↑ Nrf2<br>↓ IL-1β, ↓ TNF-α                                                           |                                                              | 2017<br>Amirghofran et al., 2011; Oliveira et al., 2017                                              |
| <i>Tropaeolum majus</i>           | Nasturtium                             | Kapuzinerkresse         | <i>Tropaeolaceae</i>  | Benzyl glucosinolate                   | Isothiocyanate          | ↓ COX-2,<br>↓ ERK1/2,<br>↓ JNK, ↓ PGE <sub>2</sub>                                            |                                                              | Rodriguez Villanueva et al., 2016                                                                    |
| <i>Uncaria tomentosa</i>          | Cat's claw                             | Katzenkralle            | <i>Rubiaceae</i>      | Mitraphylline                          | Indole alkaloid         | ↓ c-Fos, ↓ c-Jun,<br>↓ IL-1α, ↓ IL-1β,<br>↓ IL-4, ↓ IL-17,<br>↓ Jun-B,<br>↓ Jun-D,<br>↓ TNF-α | Adjuvant treatment for reducing adverse chemotherapy effects | Sandoval et al., 2000; Allen-Hall et al., 2010; Rojas-Duran et al., 2012; Santos Araújo et al., 2012 |
| <i>Urtica dioica</i>              | Stinging nettle                        | Große Brennnessel       | <i>Urticaceae</i>     | Hydroxycinnamic acid, chlorogenic acid | Cinnamate               | ↓ 12-LOX,<br>↓ COX-1,<br>↓ COX-2,<br>↓ MCP-1, ↓ NO                                            |                                                              | Carvalho et al., 2017; Francišković et al., 2017                                                     |
| <i>Usnea barbata</i>              | Barber's itch                          | Bartflechte             | <i>Parmeliaceae</i>   | Usnic acid                             | Benzofuran              | ↓ PGE <sub>2</sub>                                                                            |                                                              | Engel et al., 2007; Ranković et al., 2012                                                            |
| <i>Vaccinium myrtillus</i>        | Bilberry                               | Heidelbeere             | <i>Ericaceae</i>      |                                        | Anthocyanins            | ↓ COX-2, ↓ IL-6,<br>↓ IL-12, ↓ iNOS                                                           | Different inflammatory processes                             | Sautebin et al., 2004; Karlsen et al., 2010; Kolehmainen et al., 2012                                |
| <i>Valeriana officinalis</i> (L.) | Common valerian                        | Echter Baldrian         | <i>Caprifoliaceae</i> | Valerenic acid                         | Sesquiterpene           | ↓ MDA                                                                                         |                                                              | Nam et al., 2013                                                                                     |
| <i>Vanilla planifolia</i>         | Vanilla                                | Gewürzvanille           | <i>Orchidaceae</i>    | Vanillin                               | Benzaldehyde            | ↑ GSH, ↓ MDA,<br>↓ NF-κB,<br>↓ TNF-α                                                          |                                                              | Elseweidy et al., 2017                                                                               |
| <i>Verbena officinalis</i>        | Common vervain                         | Echtes Eisenkraut       | <i>Verbenaceae</i>    |                                        |                         |                                                                                               |                                                              |                                                                                                      |
| <i>Vigna radiata</i>              | Mung bean (dried)                      | Mungbohnen (getrocknet) | <i>Fabaceae</i>       | Gallic acid<br>Vitexin, isovitexin     | Benzoate<br>Flavonoids  | ↓ IL-1β, ↓ IL-6,<br>↓ IL-12β,<br>↓ iNOS, ↓ TNF-α                                              |                                                              | Tang et al., 2014                                                                                    |
| <i>Vigna radiata</i>              | Mung bean (cooked in boiling water for | Mungbohnen (gekocht)    | <i>Fabaceae</i>       | Gallic acid<br>Vitexin, isovitexin     | Benzoate<br>Flavonoids  | ↓ IL-1β, ↓ IL-6,<br>↓ IL-12β,                                                                 |                                                              | Tang et al., 2014                                                                                    |

| Latin name                 | Common English name           | Common German name | Family               | Active compound       | Compound classification | Influence on (inflammatory) marker                                                                                                       | Beneficial human health effect                                                                      | Reference                                                        |
|----------------------------|-------------------------------|--------------------|----------------------|-----------------------|-------------------------|------------------------------------------------------------------------------------------------------------------------------------------|-----------------------------------------------------------------------------------------------------|------------------------------------------------------------------|
| <i>Viscum album</i>        | 20 min)<br>European mistletoe | Weißbeerige Mistel | <i>Santalaceae</i>   |                       | Diarylheptanoids        | ↓ iNOS, ↓ TNF- $\alpha$<br>↓ IL-6, ↓ IL-12,<br>↓ TNF- $\alpha$                                                                           | Quality of life and reduction of side effects in cancer                                             | Kienle and Kiene, 2010; Büssing et al., 2012; Nhiem et al., 2013 |
| <i>Zingiber officinale</i> | Ginger                        | Ingwer             | <i>Zingiberaceae</i> | 6-Gingerol, 6-shogaol | Catechols               | ↓ AP-1,<br>↓ COX-1,<br>↓ COX-2,<br>↓ IL-1 $\beta$ , ↓ IL-12,<br>↓ I $\kappa$ B $\alpha$ , ↓ LOX,<br>↓ NF- $\kappa$ B,<br>↓ TNF- $\alpha$ | Antiemetic and inhibition of nausea and vomiting in pregnancy; Beneficial effects in osteoarthritis | Prasad and Aggarwal, 2014; Mohd Yusof, 2016; Dragos et al., 2017 |
