# Supplementary material for: Screening of herbal extracts for TLR2- and TLR4-dependent anti-inflammatory effects
Source: PubMed Central journal article supplement (PMC6181297; doi:10.1371/journal.pone.0203907), 2018-10-11
Supplement: pone.0203907.s003.pdf [file pone.0203907.s003.pdf]

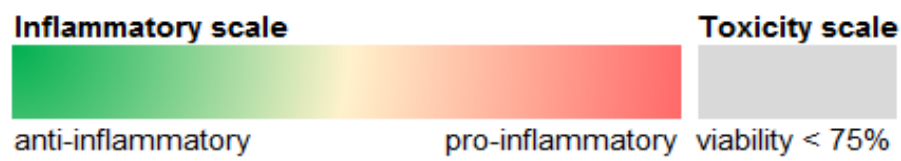

|                                   |                      |                     | HeLa-TLR4 reporter cell line |        |        |        |        |        |        | THP-1 monocytes |        |        |        |        |        |        |
|-----------------------------------|----------------------|---------------------|------------------------------|--------|--------|--------|--------|--------|--------|-----------------|--------|--------|--------|--------|--------|--------|
| Latin name                        | Common English name  | Used part           | 0.01%                        | 0.03%  | 0.1%   | 0.3%   | 0.6%   | 1%     | 3%     | 0.01%           | 0.03%  | 0.1%   | 0.3%   | 0.6%   | 1%     | 3%     |
| Ethanol control                   |                      |                     | 100,00                       | 101,30 | 103,67 | 102,01 | 93,23  | 85,77  | 90,26  | 98,88           | 97,04  | 96,54  | 96,59  | 97,67  | 95,66  | 107,91 |
| <i>Castanea sativa</i>            | Sweet chestnut       | Leaf                | 90,53                        | 82,03  | 30,91  | 3,53   | 10,59  | 1,34   | 0,79   | 118,69          | 71,34  | 46,42  | 25,73  | 5,65   | 0,00   | 0,00   |
| <i>Cinchona pubescens</i>         | Cinchona             | Bark                | 122,15                       | 137,25 | 148,02 | 131,28 | 148,76 | 98,71  | 2,77   | 47,68           | 104,26 | 125,10 | 62,37  | 29,49  | 15,68  | 3,49   |
| <i>Cinnamomum verum</i>           | Cinnamon             | Bark                | 96,77                        | 98,57  | 109,17 | 83,50  | 59,41  | 21,59  | 3,24   | 101,16          | 87,70  | 95,31  | 106,02 | 26,08  | 6,08   | 11,36  |
| <i>Salix alba</i>                 | White willow         | Bark                | 93,03                        | 74,48  | 79,05  | 99,83  | 58,02  | 3,79   | 1,45   | 97,50           | 93,93  | 88,45  | 33,44  | 5,95   | 0,00   | 21,34  |
| <i>Rheum palmatum</i>             | Rhubarb              | Root                | 71,38                        | 72,58  | 79,60  | 55,28  | 64,48  | 96,37  | 2,34   | 99,17           | 98,60  | 27,86  | 6,42   | 1,94   | 3,57   | 29,89  |
| <i>Alchemilla vulgaris</i>        | Common lady's mantle | Whole plant         | 91,35                        | 85,79  | 82,86  | 76,83  | 66,53  | 78,18  | 1,63   | 125,37          | 102,96 | 92,63  | 62,93  | 60,89  | 73,46  | 0,00   |
| <i>Humulus lupulus</i>            | Hops                 | Flower              | 64,31                        | 67,38  | 74,08  | 3,57   | 1,10   | 0,92   | 0,96   | 108,76          | 99,78  | 55,66  | 1,46   | 0,00   | 0,00   | 0,73   |
| <i>Vaccinium myrtillus</i>        | Bilberries           | Fruit/berry/seed    | 86,00                        | 84,71  | 81,50  | 80,48  | 83,01  | 76,30  | 68,10  | 102,84          | 91,37  | 92,22  | 96,85  | 92,91  | 92,95  | 63,02  |
| <i>Curcuma longa</i>              | Turmeric             | Root                | 124,40                       | 109,62 | 142,43 | 67,28  | 11,92  | 5,54   | 1,83   | 127,14          | 110,90 | 115,73 | 45,39  | 8,99   | 0,00   | 15,80  |
| <i>Arctostaphylos uva-ursi</i>    | Bearberry            | Leaf                | 91,28                        | 109,88 | 127,59 | 123,26 | 86,52  | 40,81  | 1,18   | 89,45           | 99,97  | 27,43  | 5,97   | 1,72   | 4,71   | 35,80  |
| <i>Allium ursinum</i>             | Wild garlic          | Leaf                | 115,74                       | 118,86 | 97,71  | 91,94  | 81,27  | 78,25  | 42,93  | 105,80          | 109,20 | 77,64  | 38,94  | 24,16  | 5,90   | 11,21  |
| <i>Hypericum perforatum</i>       | St John's wort       | Whole plant         | 120,77                       | 104,44 | 85,91  | 83,69  | 71,41  | 53,35  | 14,06  | 91,44           | 85,40  | 90,32  | 71,54  | 51,19  | 32,03  | 1,14   |
| <i>Arnica montana</i>             | Arnica               | Flower              | 114,17                       | 96,34  | 2,78   | 2,14   | 2,61   | 2,55   | 1,28   | 144,96          | 146,96 | 11,90  | 0,70   | 0,69   | 1,67   | 0,53   |
| <i>Aloe ferox</i>                 | Aloe                 | Whole plant         | 105,30                       | 105,90 | 82,53  | 58,19  | 27,69  | 5,15   | 1,30   | 123,82          | 117,87 | 88,51  | 38,22  | 9,71   | 7,37   | 0,13   |
| <i>Cynara scolymus</i>            | Artichoke            | Leaf                | 109,98                       | 112,42 | 117,52 | 100,14 | 90,16  | 31,21  | 1,99   | 47,40           | 53,68  | 127,22 | 228,92 | 16,56  | 6,13   | 2,86   |
| <i>Salvia officinalis</i>         | Salvia               | Leaf                | 94,88                        | 96,95  | 107,50 | 89,57  | 73,14  | 17,55  | 2,65   | 94,87           | 87,05  | 79,10  | 72,53  | 97,48  | 42,03  | 0,00   |
| <i>Ginkgo biloba</i>              | Ginkgo               | Leaf                | 107,04                       | 120,25 | 119,37 | 90,15  | 44,17  | 4,77   | 2,22   | 124,31          | 101,09 | 22,26  | 7,98   | 16,68  | 9,27   | 0,00   |
| <i>Tanacetum parthenium</i>       | Feverfew             | Whole plant         | 127,34                       | 111,53 | 120,04 | 114,28 | 99,98  | 68,82  | 2,22   | 129,88          | 139,58 | 123,43 | 124,51 | 72,56  | 21,24  | 6,12   |
| <i>Vigna radiata</i>              | Mung bean (dried)    | Fruit/berry/seed    | 83,31                        | 85,02  | 87,84  | 85,99  | 69,53  | 52,04  | 25,33  | 121,14          | 141,32 | 120,83 | 62,61  | 38,87  | 23,18  | 11,00  |
| <i>Betula verrucosa</i>           | Weeping birch        | Juice/resin         | 144,10                       | 148,90 | 136,35 | 139,46 | 143,77 | 154,99 | 88,24  | 120,90          | 131,27 | 106,29 | 88,92  | 93,49  | 94,35  | 93,18  |
| <i>Filipendula ulmaria</i>        | Meadowsweet          | Flower              | 120,04                       | 113,11 | 130,06 | 117,06 | 106,72 | 131,55 | 52,01  | 132,40          | 135,84 | 124,42 | 75,12  | 23,05  | 8,87   | 1,88   |
| <i>Matricaria chamomilla</i>      | Chamomile            | Whole plant         | 100,35                       | 104,50 | 90,84  | 78,36  | 84,92  | 5,43   | 1,26   | 107,39          | 110,30 | 81,01  | 78,37  | 109,61 | 0,00   | 0,00   |
| <i>Spirulina</i>                  | Spirulina            | Whole cyanobacteria | 93,17                        | 100,77 | 107,05 | 92,24  | 76,80  | 50,64  | 3,57   | 142,68          | 138,71 | 169,61 | 74,85  | 20,59  | 2,70   | 36,20  |
| <i>Gentiana lutea</i>             | Gentian              | Root                | 120,08                       | 105,07 | 118,69 | 89,81  | 89,96  | 82,85  | 39,06  | 80,63           | 60,91  | 89,51  | 140,23 | 62,51  | 43,53  | 2,92   |
| <i>Quercus robur</i>              | English oak          | Bark                | 143,68                       | 142,56 | 127,88 | 124,88 | 134,53 | 106,17 | 8,76   | 106,31          | 116,82 | 88,62  | 57,00  | 35,67  | 16,07  | 16,81  |
| <i>Glycyrrhiza glabra</i>         | Liquorice            | Root                | 69,76                        | 13,55  | 17,52  | 2,60   | 2,55   | 2,39   | 1,41   | 124,15          | 119,86 | 9,19   | 2,26   | 0,00   | 0,00   | 0,00   |
| <i>Coriandrum sativum</i>         | Coriander            | Fruit/berry/seed    | 94,70                        | 82,24  | 87,66  | 90,37  | 89,65  | 77,49  | 44,98  | 145,74          | 168,38 | 152,38 | 158,20 | 188,96 | 155,51 | 6,45   |
| <i>Achillea millefolium</i>       | Common yarrow        | Whole plant         | 99,04                        | 103,48 | 102,37 | 83,36  | 68,35  | 55,50  | 4,09   | 93,70           | 98,28  | 118,44 | 107,59 | 100,57 | 52,47  | 0,54   |
| <i>Mentha piperita</i>            | Peppermint           | Whole plant         | 102,97                       | 91,41  | 91,14  | 78,20  | 72,36  | 55,95  | 6,57   | 130,45          | 151,24 | 119,30 | 123,66 | 149,47 | 84,49  | 0,00   |
| <i>Zingiber officinale</i>        | Ginger               | Root                | 94,65                        | 103,21 | 52,82  | 24,16  | 2,18   | 4,32   | 3,92   | 73,81           | 82,12  | 75,13  | 80,11  | 34,29  | 0,19   | 6,73   |
| <i>Carum carvi</i>                | Caraway              | Fruit/berry/seed    | 108,52                       | 107,56 | 121,15 | 115,23 | 96,15  | 83,63  | 2,63   | 126,27          | 123,61 | 127,15 | 136,91 | 201,67 | 118,87 | 0,00   |
| <i>Boswellia serrata</i>          | Frankincense         | Juice/resin         | 109,56                       | 96,96  | 80,61  | 3,87   | 2,80   | 3,49   | 2,35   | 97,42           | 88,36  | 75,32  | 23,64  | 10,16  | 11,86  | 9,76   |
| <i>Camellia sinensis</i> (L.)     | Green tea            | Leaf                | 71,42                        | 64,90  | 60,73  | 53,03  | 34,40  | 5,10   | 2,05   | 104,85          | 90,19  | 80,66  | 52,63  | 128,30 | 78,12  | 71,24  |
| <i>Echinacea purpurea</i>         | Purple coneflower    | Whole plant         | 93,87                        | 121,50 | 103,17 | 111,27 | 121,75 | 86,28  | 3,42   | 110,63          | 100,92 | 147,05 | 98,88  | 95,70  | 98,35  | 1,71   |
| <i>Ilex paraguariensis</i>        | Yerba mate           | Leaf                | 118,38                       | 113,40 | 129,00 | 98,03  | 46,11  | 7,19   | 1,87   | 138,05          | 86,82  | 106,45 | 142,70 | 113,19 | 149,98 | 29,15  |
| <i>Melissa officinalis</i>        | Lemon balm           | Leaf                | 139,03                       | 150,28 | 144,79 | 79,25  | 68,78  | 76,74  | 2,31   | 88,63           | 126,13 | 138,48 | 148,82 | 86,05  | 36,73  | 0,00   |
| <i>Daucus carota ssp. sativus</i> | Carrot               | Root                | 98,38                        | 101,96 | 87,71  | 99,88  | 87,68  | 98,85  | 87,26  | 96,35           | 110,50 | 87,33  | 79,92  | 93,51  | 85,16  | 137,06 |
| <i>Alpinia officinarum</i>        | Galangal             | Root                | 119,58                       | 118,04 | 149,25 | 135,19 | 45,52  | 3,29   | 2,27   | 127,08          | 98,10  | 138,77 | 38,12  | 0,70   | 0,00   | 2,44   |
| <i>Boswellia carterii</i>         | Frankincense         | Whole plant         | 149,54                       | 178,92 | 15,63  | 14,15  | 11,16  | 11,09  | 12,66  | 27,95           | 31,63  | 4,81   | 7,98   | 18,51  | 6,92   | 3,63   |
| <i>Hamamelis virginiana</i>       | Witch hazel          | Leaf                | 100,46                       | 99,15  | 137,19 | 118,74 | 70,76  | 4,96   | 1,01   | 123,19          | 189,63 | 211,05 | 38,28  | 5,85   | 5,40   | 7,92   |
| <i>Equisetum arvense</i>          | Field horsetail      | Whole plant         | 113,79                       | 125,14 | 120,99 | 128,87 | 130,20 | 133,00 | 109,17 | 93,55           | 94,65  | 83,58  | 114,07 | 124,64 | 145,69 | 189,41 |

|                                   |                      |                   |        |        |        |        |        |        |        |        |        |        |        |        |        |        |
|-----------------------------------|----------------------|-------------------|--------|--------|--------|--------|--------|--------|--------|--------|--------|--------|--------|--------|--------|--------|
| <i>Scrophularia nodosa</i>        | Common figwort       | Whole plant       | 98,78  | 93,42  | 113,41 | 123,22 | 114,38 | 105,67 | 10,92  | 107,47 | 125,14 | 152,78 | 113,07 | 101,17 | 88,26  | 24,69  |
| <i>Lavandula angustifolia</i>     | Lavender             | Flower            | 93,68  | 101,24 | 110,76 | 95,94  | 91,92  | 36,15  | 3,80   | 81,97  | 87,67  | 115,57 | 116,55 | 141,91 | 137,61 | 0,00   |
| <i>Euphrasia officinalis</i>      | Eyebright            | Whole plant       | 101,53 | 105,92 | 114,90 | 115,55 | 113,31 | 116,53 | 10,37  | 136,41 | 103,87 | 107,91 | 96,64  | 107,09 | 125,33 | 0,38   |
| <i>Capsicum frutescens</i>        | Chili                | Fruit/berry/seed  | 101,94 | 167,29 | 120,07 | 115,20 | 118,62 | 95,65  | 3,07   | 117,80 | 124,86 | 154,50 | 180,15 | 171,38 | 145,55 | 29,51  |
| <i>Erythraea centaureum</i>       | Common centaury      | Whole plant       | 106,04 | 92,14  | 96,31  | 87,33  | 82,62  | 62,99  | 5,13   | 113,71 | 85,01  | 148,74 | 133,41 | 141,78 | 119,84 | 4,22   |
| <i>Hibiscus sabdariffa</i>        | Roselle              | Leaf              | 105,58 | 98,26  | 132,94 | 133,23 | 118,60 | 97,39  | 48,78  | 90,10  | 94,55  | 87,49  | 93,64  | 145,26 | 231,97 | 65,51  |
| <i>Chlorella pyrenoidosa</i>      | Chlorella            | Whole green algae | 71,44  | 72,14  | 75,70  | 62,00  | 44,51  | 16,46  | 2,86   | 102,98 | 94,60  | 18,27  | 0,00   | 0,00   | 0,00   | 173,01 |
| <i>Allium sativum</i>             | Garlic               | Root              | 78,39  | 95,63  | 87,21  | 84,35  | 83,82  | 96,56  | 112,72 | 129,06 | 117,29 | 96,92  | 89,62  | 103,10 | 110,42 | 132,77 |
| <i>Melilotus officinalis</i>      | Sweet clover         | Whole plant       | 111,02 | 114,31 | 92,87  | 95,90  | 86,37  | 76,52  | 30,05  | 107,23 | 86,20  | 97,54  | 119,85 | 62,88  | 158,37 | 0,00   |
| <i>Artemisia absinthium</i>       | Wormwood             | Whole plant       | 118,20 | 128,44 | 124,74 | 137,46 | 112,64 | 90,75  | 1,69   | 146,74 | 160,40 | 77,99  | 89,46  | 44,77  | 51,21  | 0,00   |
| <i>Uncaria tomentosa</i>          | Cat's claw           | Whole plant       | 131,44 | 136,66 | 124,86 | 114,39 | 100,57 | 132,50 | 121,12 | 109,66 | 131,32 | 109,33 | 105,76 | 107,51 | 109,99 | 104,97 |
| <i>Origanum majorana</i>          | Marjoram             | Whole plant       | 109,40 | 100,22 | 104,08 | 105,12 | 87,00  | 83,56  | 44,13  | 98,64  | 99,81  | 138,44 | 139,16 | 124,52 | 147,26 | 9,77   |
| <i>Usnea barbata</i>              | Barber's itch        | Whole plant       | 93,46  | 92,28  | 106,88 | 100,70 | 101,15 | 124,63 | 3,85   | 104,78 | 100,16 | 110,27 | 111,35 | 61,61  | 63,62  | 2,27   |
| <i>Taraxacum officinale</i>       | Dandelion            | Whole plant       | 109,52 | 108,09 | 104,38 | 90,20  | 98,79  | 80,62  | 56,45  | 140,46 | 125,98 | 150,64 | 197,11 | 101,07 | 104,89 | 109,75 |
| <i>Crataegus sp.</i>              | Hawthorn             | Fruit/berry/seed  | 98,69  | 95,22  | 83,59  | 88,20  | 75,56  | 67,10  | 6,03   | 68,02  | 87,86  | 90,53  | 169,63 | 108,10 | 175,25 | 5,53   |
| <i>Syzygium aromaticum</i>        | Clove                | Flower            | 130,27 | 153,49 | 129,52 | 111,74 | 3,84   | 4,04   | 2,97   | 113,40 | 106,43 | 28,55  | 64,60  | 0,00   | 0,00   | 0,00   |
| <i>Plantago lanceolata</i>        | Ribwort              | Whole plant       | 104,81 | 156,04 | 140,16 | 152,61 | 145,60 | 124,31 | 81,91  | 73,59  | 77,75  | 99,03  | 94,45  | 91,42  | 91,59  | 135,20 |
| <i>Aconitum napellus</i>          | Monkshood            | Whole plant       | 117,73 | 122,26 | 128,16 | 141,94 | 171,12 | 159,82 | 122,60 | 99,75  | 113,53 | 110,99 | 131,43 | 154,05 | 214,24 | 226,55 |
| <i>Rubus fruticosus</i>           | Blackberry           | Leaf              | 127,50 | 109,58 | 113,80 | 106,40 | 93,56  | 73,60  | 68,53  | 155,10 | 133,75 | 158,55 | 231,87 | 137,62 | 160,15 | 6,26   |
| <i>Schinus terebinthifolius</i>   | Brazilian peppertree | Fruit/berry/seed  | 111,76 | 128,25 | 118,65 | 124,42 | 83,27  | 11,51  | 3,58   | 153,65 | 194,72 | 140,78 | 156,82 | 22,67  | 9,93   | 2,35   |
| <i>Hedera helix</i>               | Common ivy           | Leaf              | 91,23  | 92,82  | 79,19  | 4,54   | 3,93   | 4,92   | 3,35   | 106,81 | 105,99 | 164,47 | 16,45  | 0,48   | 18,81  | 3,05   |
| <i>Pulmonaria officinalis</i>     | Common lungwort      | Flower            | 130,49 | 108,61 | 136,54 | 140,36 | 116,71 | 111,27 | 75,45  | 125,06 | 95,78  | 190,61 | 162,64 | 164,20 | 134,71 | 95,52  |
| <i>Betula alba</i>                | Birch                | Juice/resin       | 132,70 | 132,59 | 119,10 | 123,74 | 109,52 | 110,59 | 175,69 | 93,66  | 114,38 | 113,57 | 96,37  | 88,04  | 113,21 | 88,16  |
| <i>Vanilla planifolia</i>         | Vanilla              | Fruit/berry/seed  | 113,32 | 101,03 | 109,01 | 117,05 | 92,96  | 94,61  | 31,02  | 103,36 | 106,83 | 167,48 | 188,94 | 131,81 | 146,05 | 6,91   |
| <i>Armoracia rusticana</i>        | Horseradish          | Root              | 112,02 | 115,66 | 120,07 | 140,73 | 134,50 | 111,66 | 45,08  | 104,74 | 124,98 | 107,81 | 106,12 | 97,03  | 142,36 | 143,87 |
| <i>Nicotiana tabacum</i>          | Tobacco              | Leaf              | 95,45  | 115,94 | 103,93 | 107,47 | 91,20  | 101,64 | 43,82  | 126,54 | 119,78 | 135,07 | 148,77 | 165,43 | 177,65 | 37,75  |
| <i>Valeriana officinalis (L.)</i> | Common valerian      | Root              | 100,20 | 91,61  | 147,82 | 156,35 | 138,95 | 52,36  | 2,58   | 138,12 | 95,56  | 147,35 | 197,61 | 206,61 | 71,26  | 5,16   |
| <i>Rosmarinus officinalis</i>     | Rosemary             | Leaf              | 85,92  | 108,99 | 122,78 | 150,67 | 97,28  | 16,54  | 4,02   | 136,08 | 138,36 | 152,73 | 128,42 | 141,11 | 0,15   | 80,17  |
| <i>Tropaeolum majus</i>           | Nasturtium           | Whole plant       | 101,46 | 84,01  | 87,90  | 77,92  | 79,16  | 75,39  | 81,14  | 86,16  | 109,46 | 140,46 | 135,69 | 107,73 | 130,22 | 81,44  |
| <i>Marrubium vulgare</i>          | Common horehound     | Whole plant       | 92,34  | 93,29  | 88,32  | 86,32  | 95,10  | 100,87 | 3,75   | 98,80  | 104,74 | 135,83 | 176,09 | 166,83 | 174,18 | 0,00   |
| <i>Xanthoria parietina</i>        | Common orange lichen | Whole lichen      | 132,43 | 117,59 | 130,84 | 104,27 | 104,89 | 106,46 | 39,67  | 150,70 | 163,97 | 169,59 | 192,87 | 206,05 | 180,74 | 1,76   |
| <i>Elettaria cardamomum</i>       | Cardamom             | Fruit/berry/seed  | 120,81 | 123,83 | 125,38 | 135,62 | 133,76 | 125,41 | 3,62   | 110,45 | 103,25 | 120,45 | 152,87 | 225,96 | 216,74 | 0,00   |
| <i>Vigna radiata</i>              | Mung bean (cooked)   | Fruit/berry/seed  | 104,69 | 135,60 | 133,28 | 135,94 | 134,61 | 147,80 | 124,20 | 106,85 | 112,74 | 124,20 | 137,77 | 159,06 | 119,88 | 98,96  |
| <i>Thymus vulgaris</i>            | Common thyme         | Whole plant       | 118,89 | 124,53 | 122,18 | 110,86 | 120,29 | 97,87  | 1,59   | 89,27  | 76,48  | 88,74  | 122,81 | 172,45 | 279,61 | 0,00   |
| <i>Foeniculum vulgare</i>         | Fennel               | Fruit/berry/seed  | 113,92 | 97,22  | 97,97  | 94,07  | 87,06  | 84,14  | 3,97   | 134,14 | 173,01 | 197,93 | 186,12 | 199,79 | 223,76 | 21,35  |
| <i>Convallaria majalis</i>        | Lily of the valley   | Whole plant       | 54,48  | 36,78  | 19,24  | 14,57  | 17,70  | 10,11  | 1,72   | 154,97 | 124,30 | 115,50 | 106,13 | 116,39 | 29,53  | 0,00   |
| <i>Sambucus nigra (L.)</i>        | Elderflower          | Flower            | 65,76  | 71,40  | 76,66  | 85,55  | 90,78  | 112,07 | 71,97  | 186,27 | 178,06 | 140,90 | 155,66 | 162,33 | 122,89 | 68,63  |
| <i>Avena sativa</i>               | Oat                  | Whole plant       | 106,83 | 121,15 | 121,84 | 107,76 | 114,50 | 118,79 | 91,19  | 98,22  | 114,88 | 116,09 | 141,54 | 156,55 | 204,12 | 498,22 |
| <i>Arnica montana</i>             | Arnica               | Whole plant       | 128,77 | 122,08 | 135,39 | 180,41 | 210,78 | 124,21 | 2,17   | 107,35 | 127,87 | 145,42 | 224,38 | 201,18 | 60,44  | 0,00   |
| <i>Geranium robertianum</i>       | Herb Robert          | Whole plant       | 84,73  | 91,07  | 108,37 | 84,64  | 92,55  | 71,75  | 142,28 | 118,42 | 113,83 | 140,82 | 148,56 | 183,75 | 184,72 | 173,60 |
| <i>Fucus vesiculosus</i>          | Bladderwrack         | Whole plant       | 122,31 | 100,62 | 99,24  | 94,51  | 93,75  | 94,92  | 108,01 | 103,21 | 95,74  | 91,21  | 104,75 | 110,16 | 113,90 | 199,19 |
| <i>Petroselinum crispum</i>       | Parsley              | Whole plant       | 122,97 | 152,03 | 133,00 | 132,12 | 119,74 | 101,03 | 38,49  | 129,60 | 163,16 | 183,36 | 155,06 | 122,44 | 153,04 | 2,18   |
| <i>Urtica dioica</i>              | Stinging nettle      | Root              | 109,01 | 104,90 | 110,43 | 109,07 | 100,86 | 93,37  | 29,81  | 137,84 | 156,50 | 224,44 | 199,41 | 185,63 | 208,82 | 100,88 |
| <i>Symphytum officinale</i>       | Comfrey              | Root              | 105,62 | 120,61 | 114,45 | 99,46  | 97,54  | 85,58  | 47,79  | 106,24 | 143,47 | 166,37 | 191,76 | 123,39 | 156,54 | 67,34  |
| <i>Althaea officinalis</i>        | Marshmallow          | Root              | 100,22 | 93,79  | 80,71  | 82,49  | 87,56  | 78,29  | 67,86  | 104,25 | 113,39 | 96,02  | 194,59 | 160,52 | 183,97 | 139,71 |
| <i>Panax ginseng</i>              | Ginseng              | Root              | 107,05 | 107,98 | 125,88 | 147,96 | 173,19 | 164,01 | 4,13   | 106,76 | 94,66  | 117,42 | 82,44  | 99,07  | 116,80 | 199,71 |
| <i>Harpagophytum procumbens</i>   | Devil's claw         | Root              | 125,75 | 116,09 | 135,75 | 145,66 | 142,70 | 144,23 | 3,68   | 115,10 | 127,64 | 160,49 | 180,30 | 147,55 | 163,53 | 275,03 |

|                               |                    |                  |        |        |        |        |        |        |       |        |        |         |         |        |        |        |
|-------------------------------|--------------------|------------------|--------|--------|--------|--------|--------|--------|-------|--------|--------|---------|---------|--------|--------|--------|
| <i>Dioscorea villosa</i>      | Yam                | Root             | 113,51 | 108,51 | 103,64 | 60,24  | 29,52  | 11,04  | 3,27  | 104,81 | 102,20 | 163,08  | 224,08  | 138,65 | 169,18 | 26,64  |
| <i>Calendula officinalis</i>  | Marigold           | Flower           | 60,30  | 40,34  | 58,30  | 3,49   | 2,91   | 2,77   | 2,19  | 91,73  | 78,85  | 269,59  | 354,55  | 0,00   | 0,00   | 0,00   |
| <i>Chelidonium majus</i>      | Celandine          | Root             | 120,88 | 105,15 | 123,10 | 127,73 | 170,41 | 111,32 | 1,42  | 99,40  | 157,00 | 190,57  | 292,73  | 271,52 | 280,41 | 0,00   |
| <i>Verbena officinalis</i>    | Common vervain     | Whole plant      | 96,47  | 88,48  | 97,54  | 86,98  | 86,77  | 85,59  | 47,65 | 127,02 | 140,00 | 208,28  | 208,79  | 233,55 | 236,51 | 374,51 |
| <i>Pimpinella anisum</i>      | Anise              | Fruit/berry/seed | 116,49 | 118,67 | 116,39 | 114,10 | 108,54 | 84,98  | 3,36  | 136,25 | 169,95 | 236,67  | 250,31  | 286,11 | 344,07 | 20,08  |
| <i>Viscum album</i>           | European mistletoe | Whole plant      | 125,75 | 138,13 | 162,97 | 160,01 | 166,89 | 174,64 | 76,09 | 93,86  | 114,91 | 100,53  | 170,99  | 242,81 | 373,37 | 625,53 |
| <i>Digitalis purpurea</i>     | Common foxglove    | Leaf             | 86,35  | 49,52  | 28,50  | 9,67   | 2,50   | 1,49   | 2,18  | 146,70 | 344,09 | 313,09  | 296,48  | 11,91  | 3,20   | 1,60   |
| <i>Primula officinalis</i>    | Common cowslip     | Root             | 122,30 | 155,54 | 145,79 | 116,90 | 57,14  | 26,43  | 3,07  | 125,37 | 140,65 | 188,90  | 819,19  | 85,17  | 12,98  | 8,91   |
| <i>Juniperus communis</i>     | Common juniper     | Fruit/berry/seed | 106,49 | 131,13 | 121,88 | 77,99  | 3,10   | 2,84   | 1,55  | 859,81 | 863,37 | 888,08  | 759,89  | 18,31  | 9,85   | 0,00   |
| <i>Aesculus hippocastanum</i> | Horse-chestnut     | Fruit/berry/seed | 110,81 | 80,80  | 92,60  | 7,84   | 5,11   | 5,00   | 3,20  | 123,23 | 134,19 | 212,88  | 1537,04 | 102,98 | 77,65  | 58,38  |
| <i>Primula vulgaris</i>       | Common primrose    | Root             | 48,96  | 26,97  | 24,47  | 13,49  | 12,19  | 8,12   | 1,52  | 115,35 | 604,33 | 1193,00 | 674,91  | 45,73  | 58,06  | 21,03  |
