# Supplementary material for: Screening of herbal extracts for TLR2- and TLR4-dependent anti-inflammatory effects
Source: PubMed Central journal article supplement (PMC6181297; doi:10.1371/journal.pone.0203907), 2018-10-11

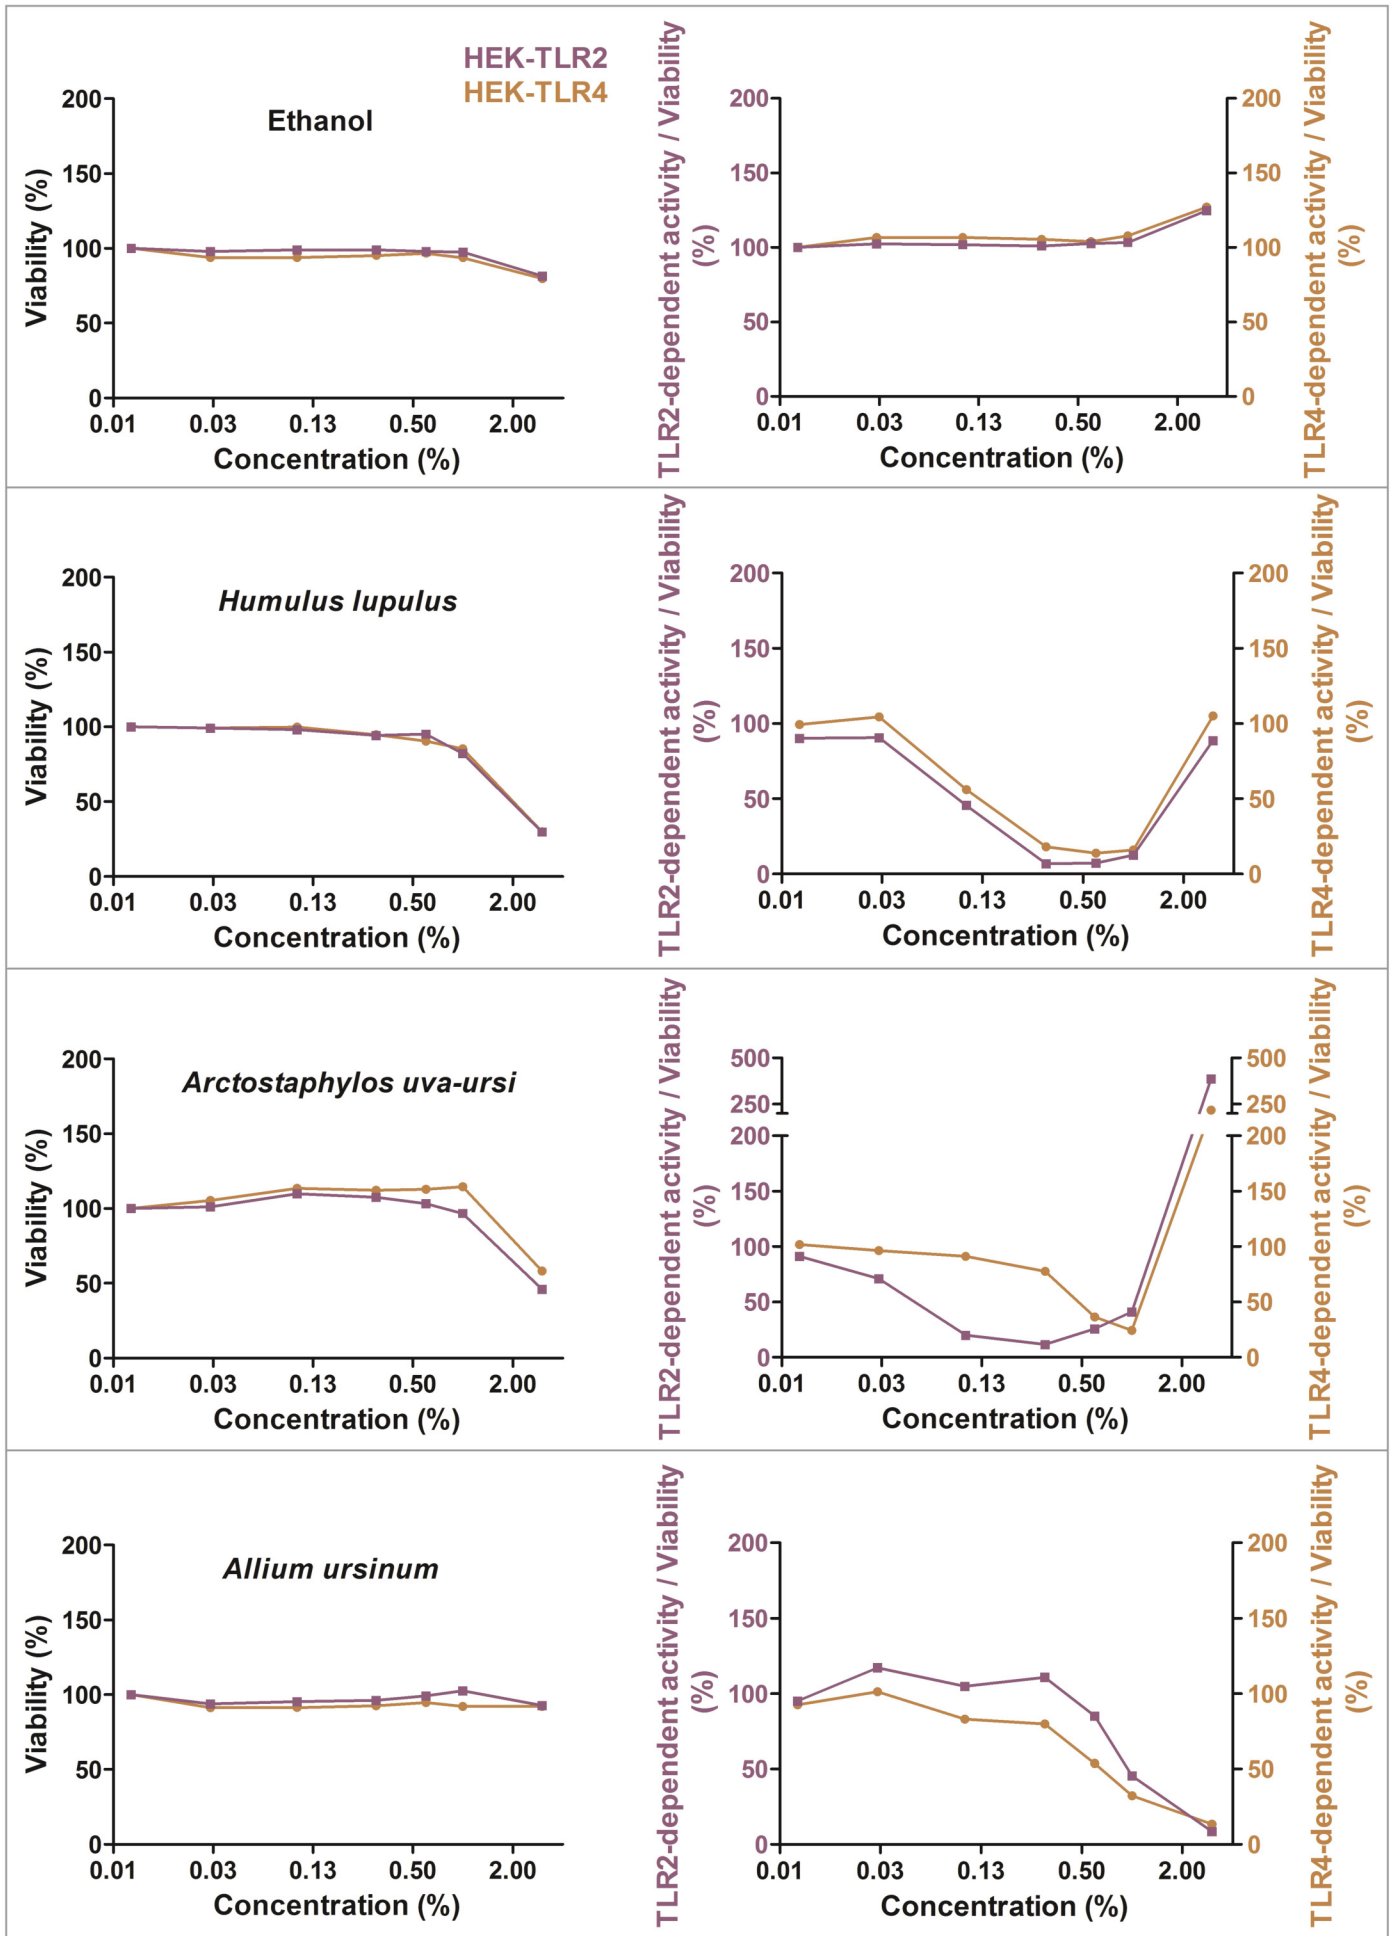

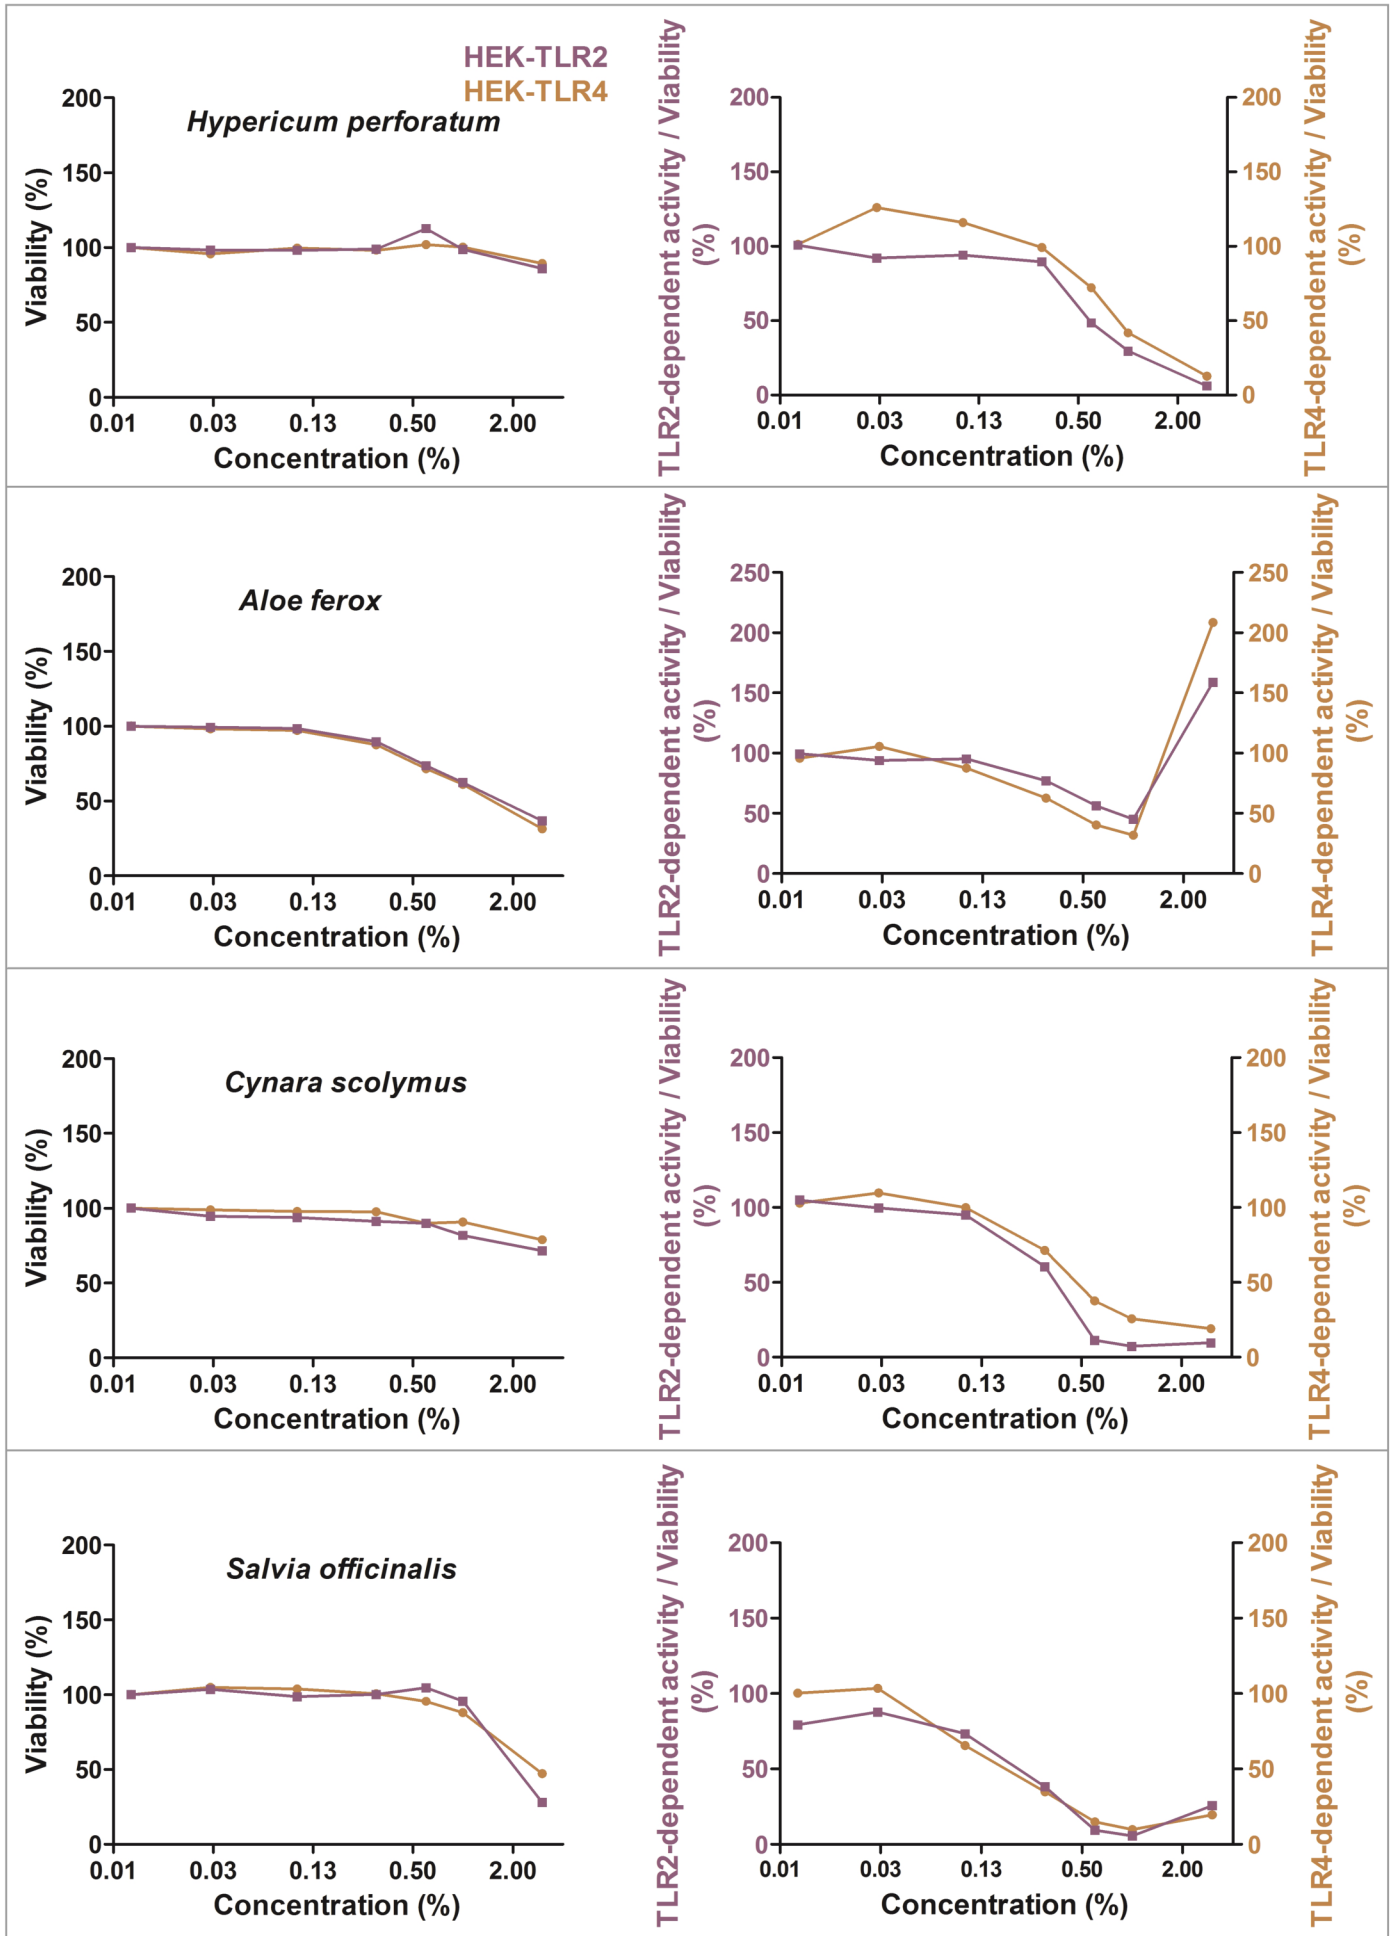

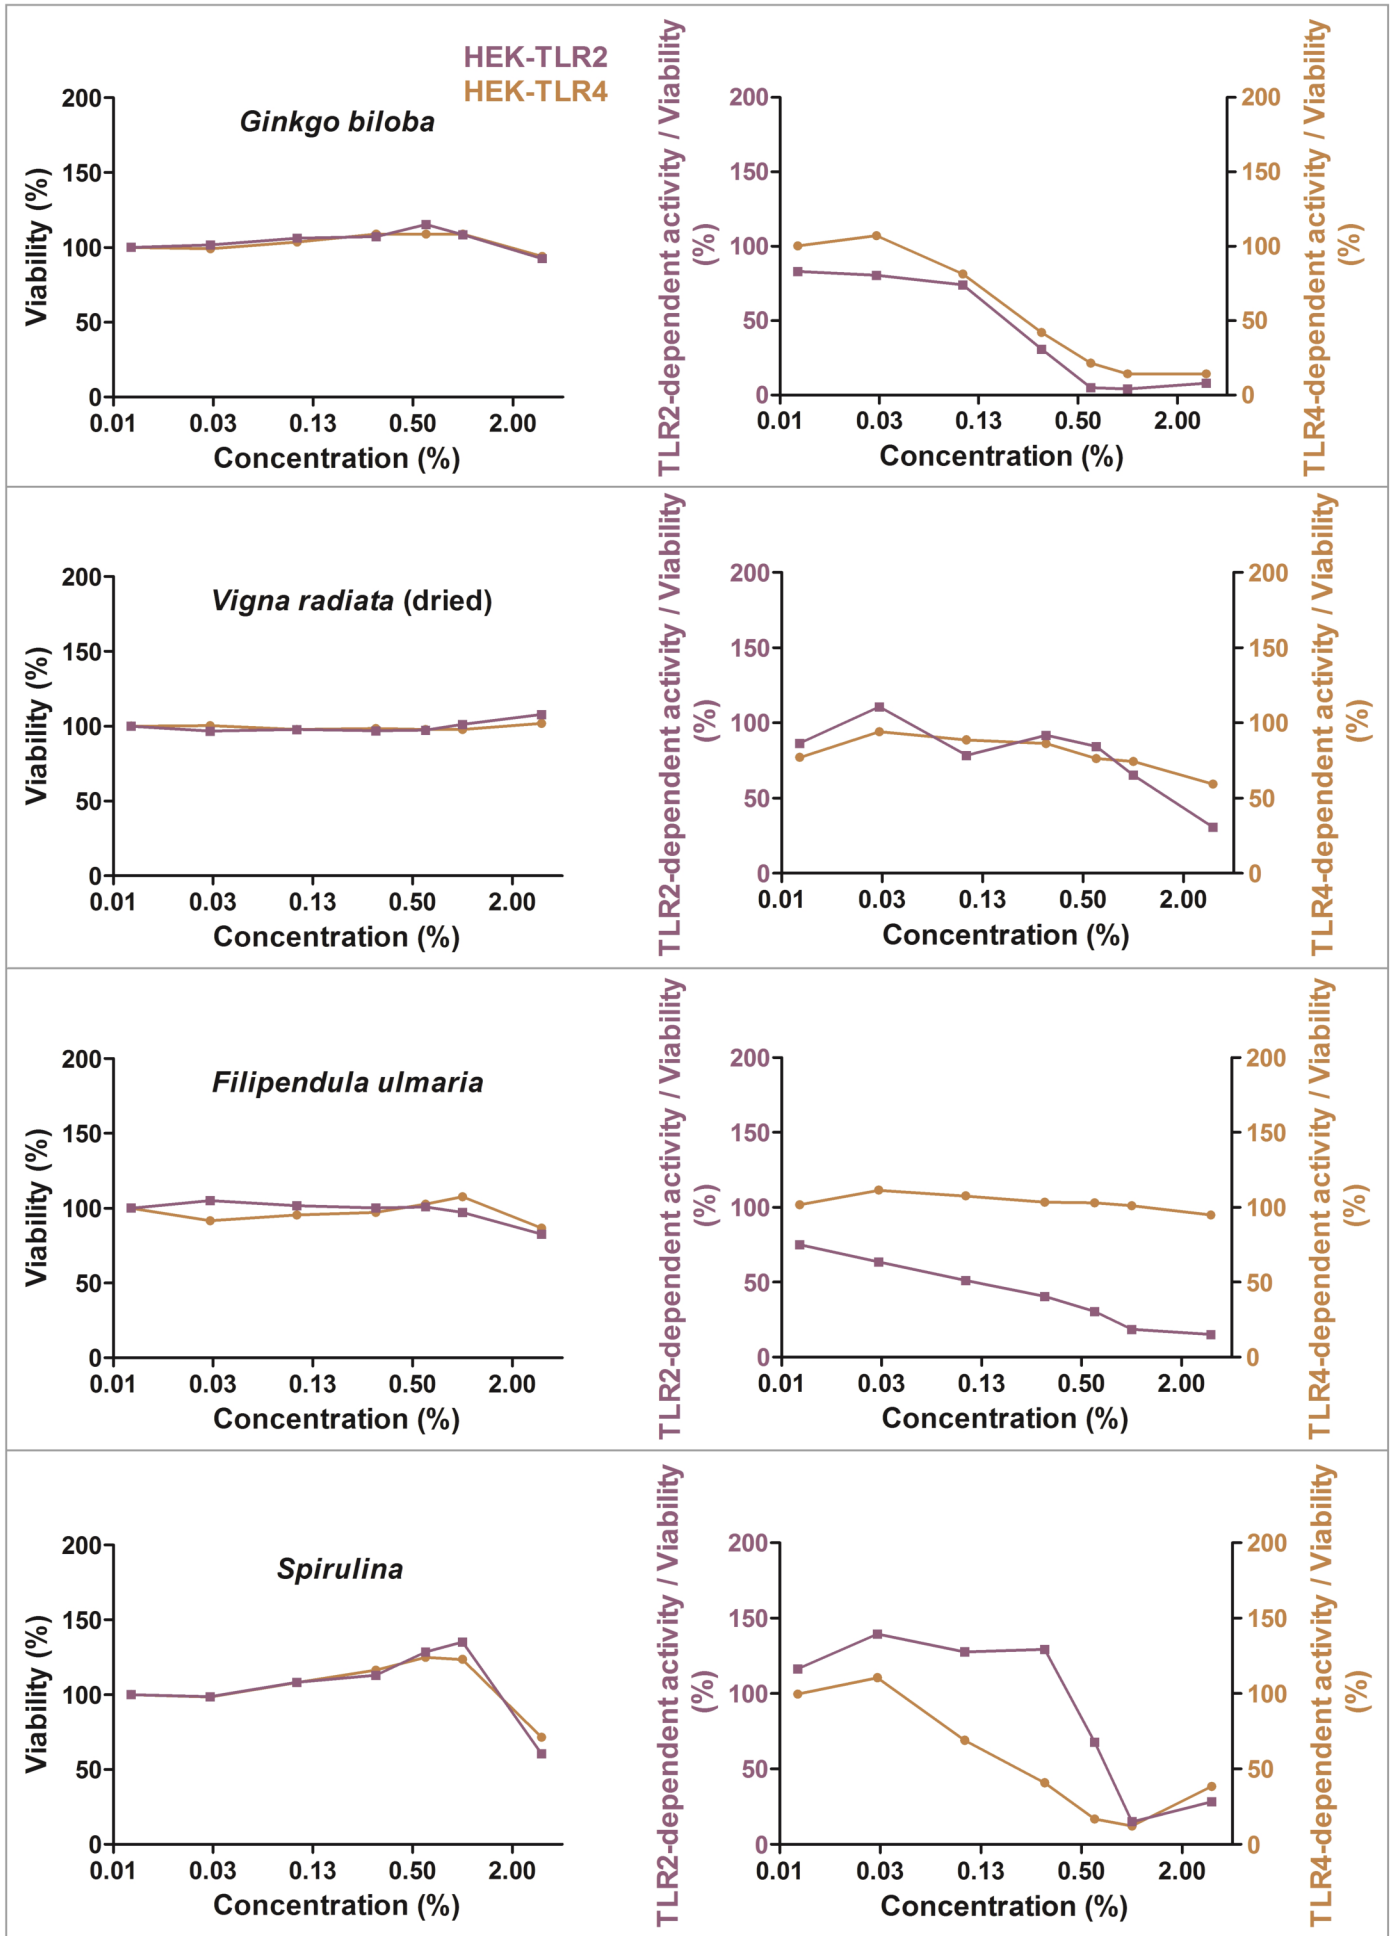

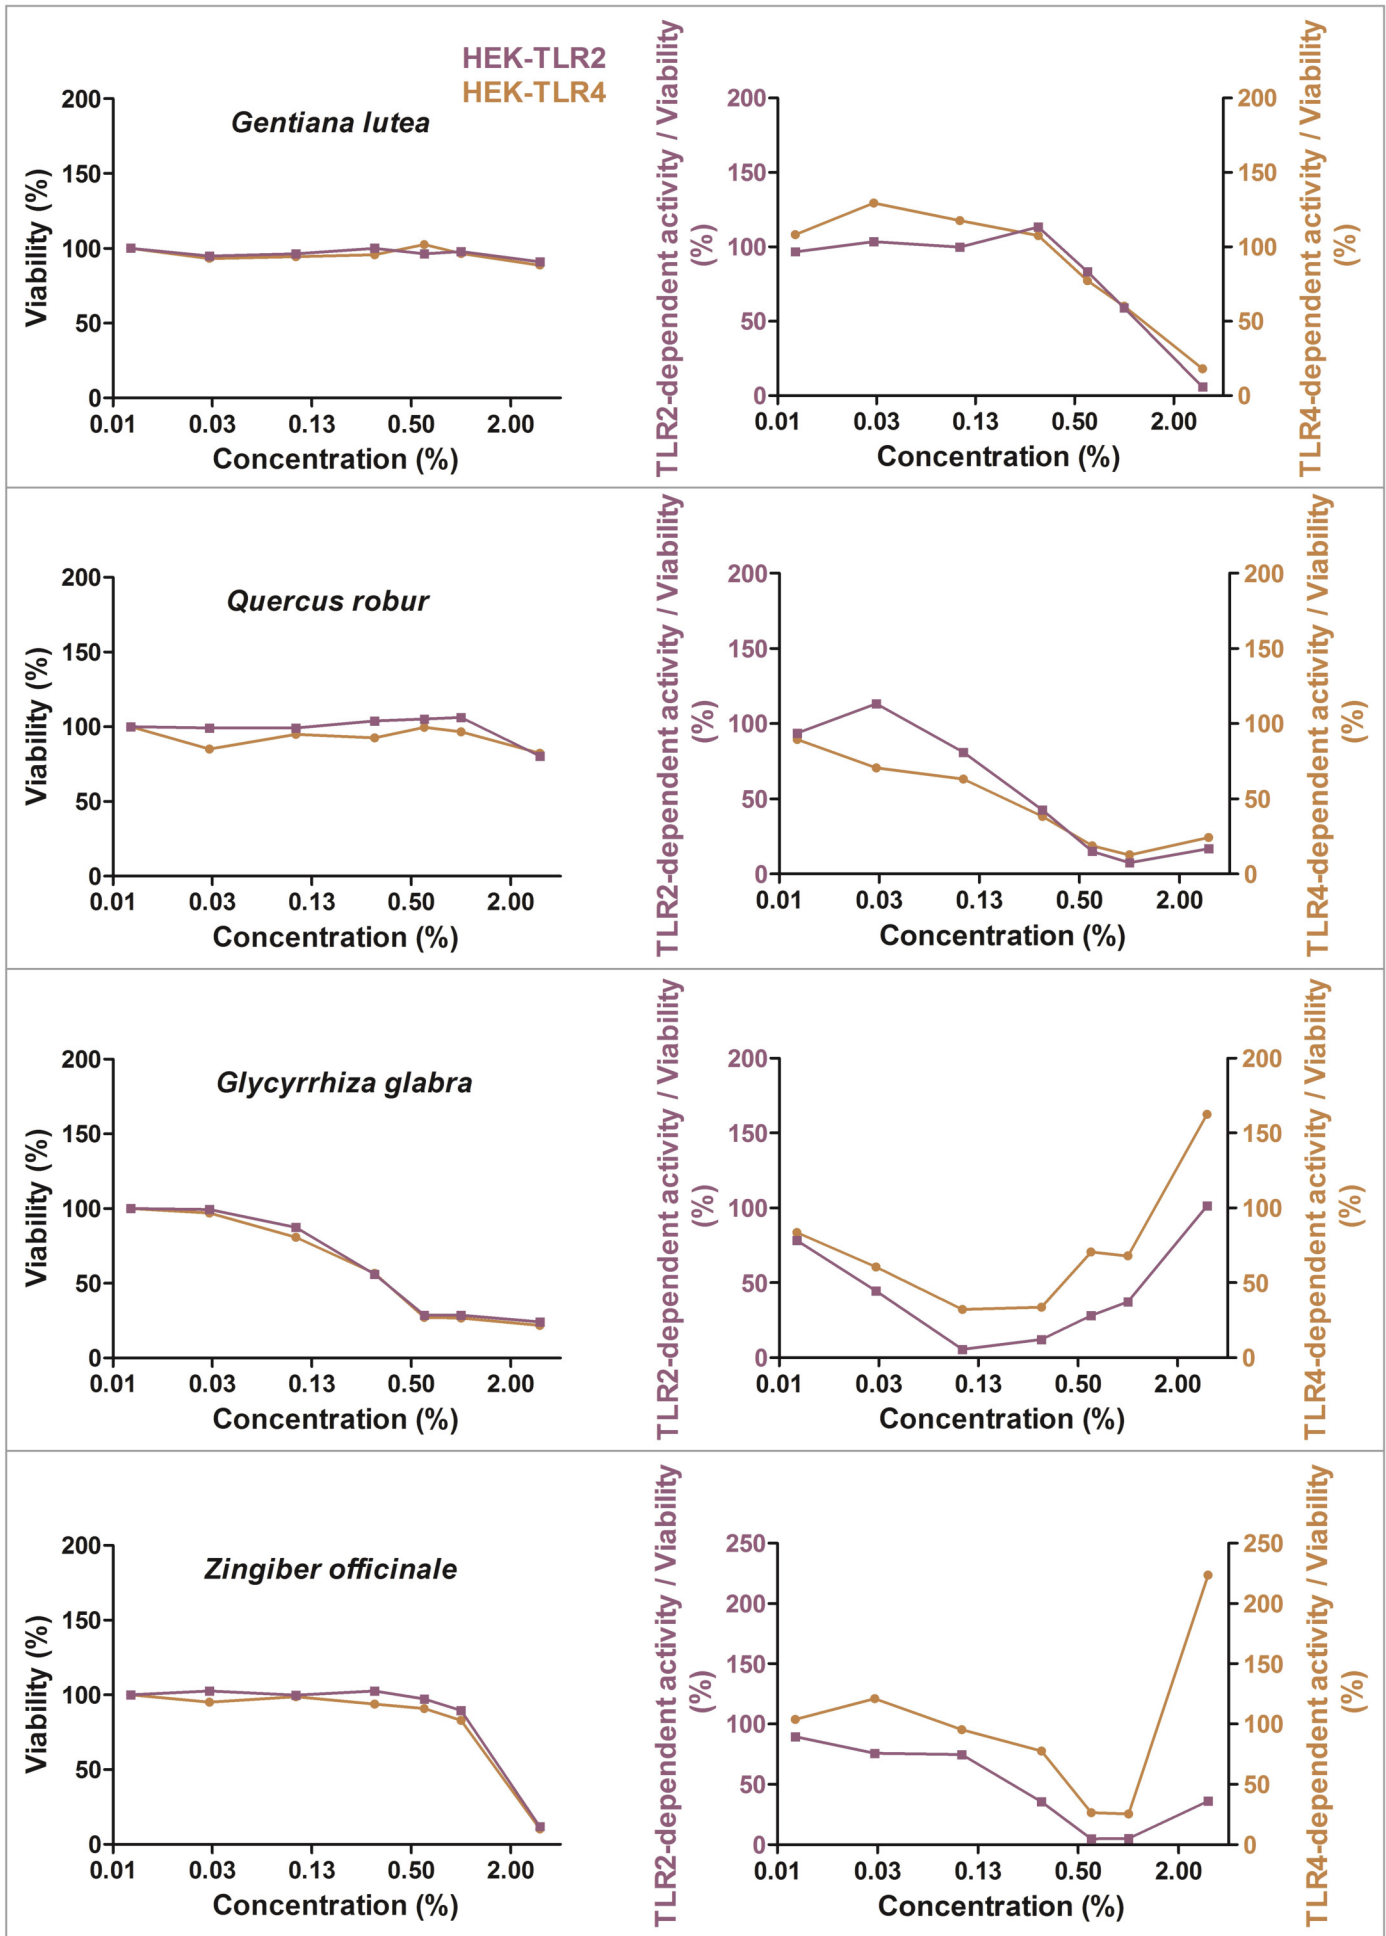

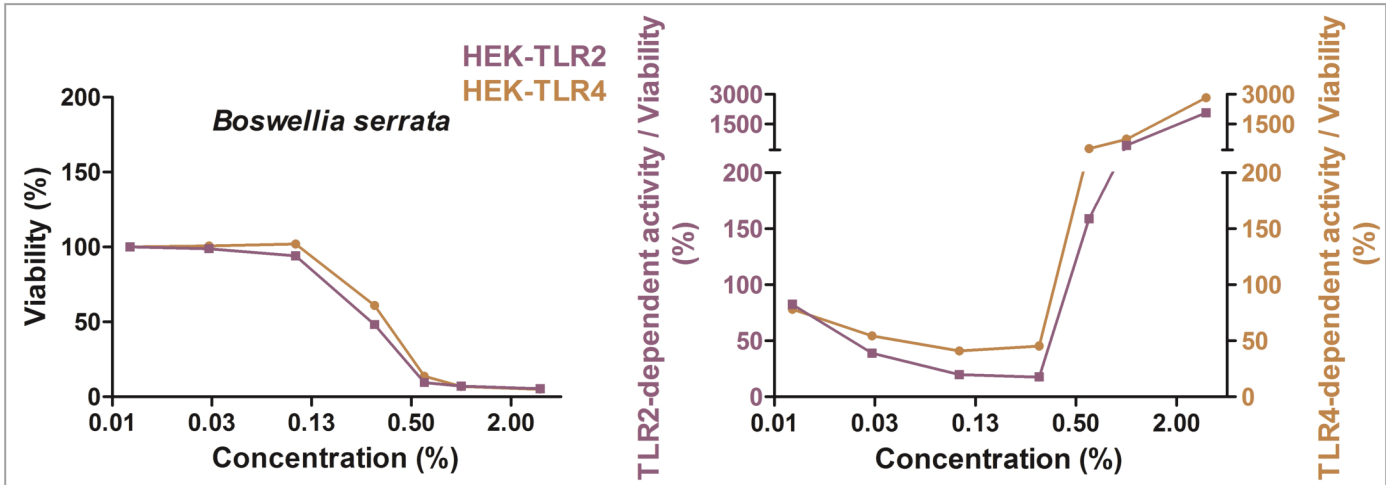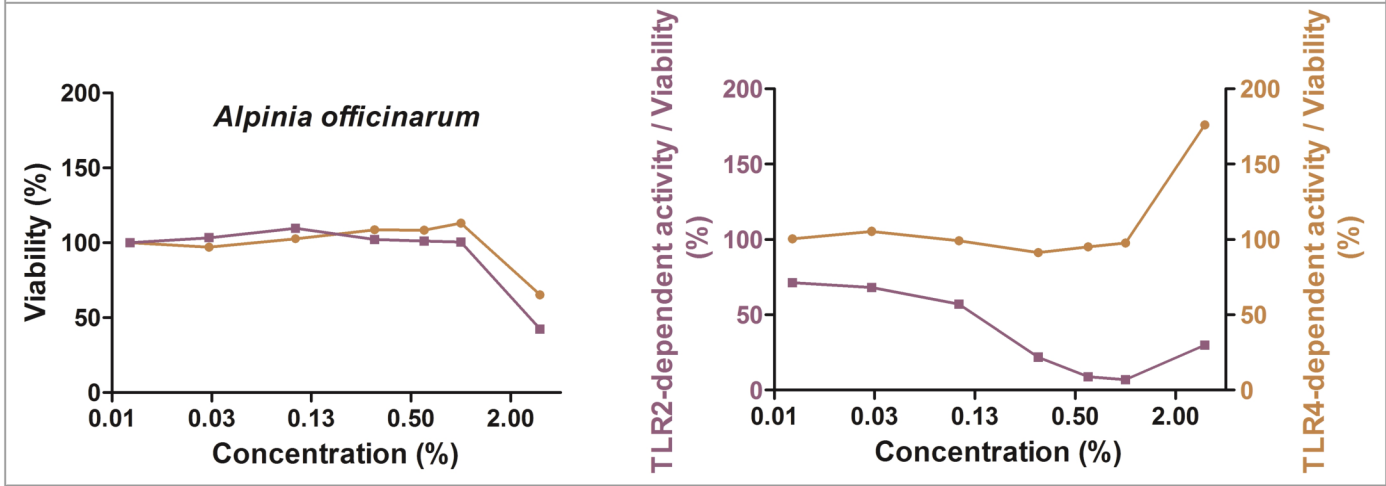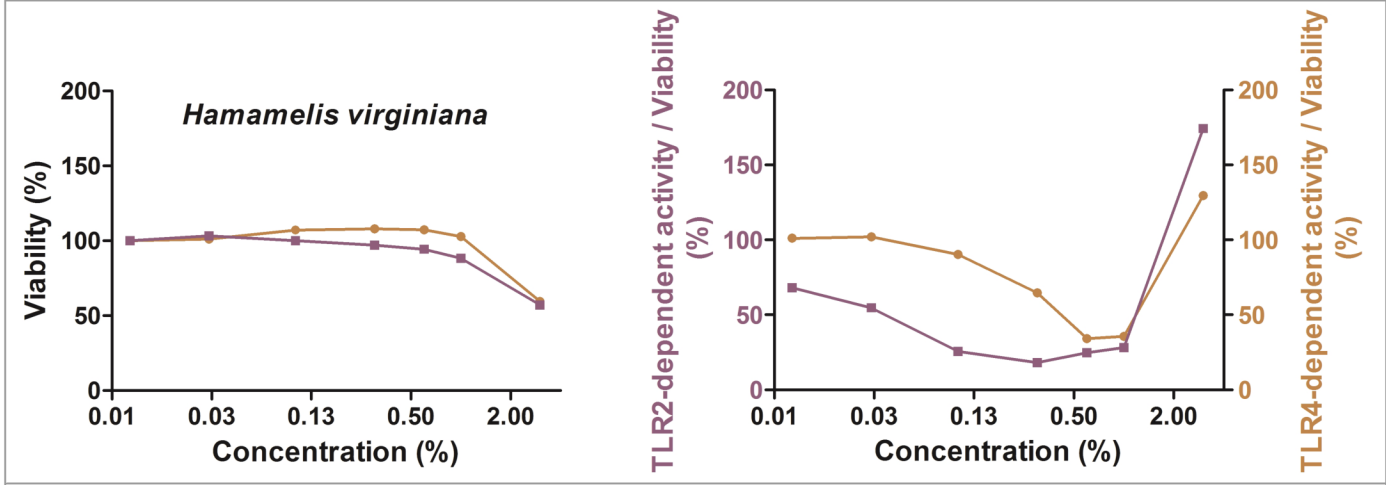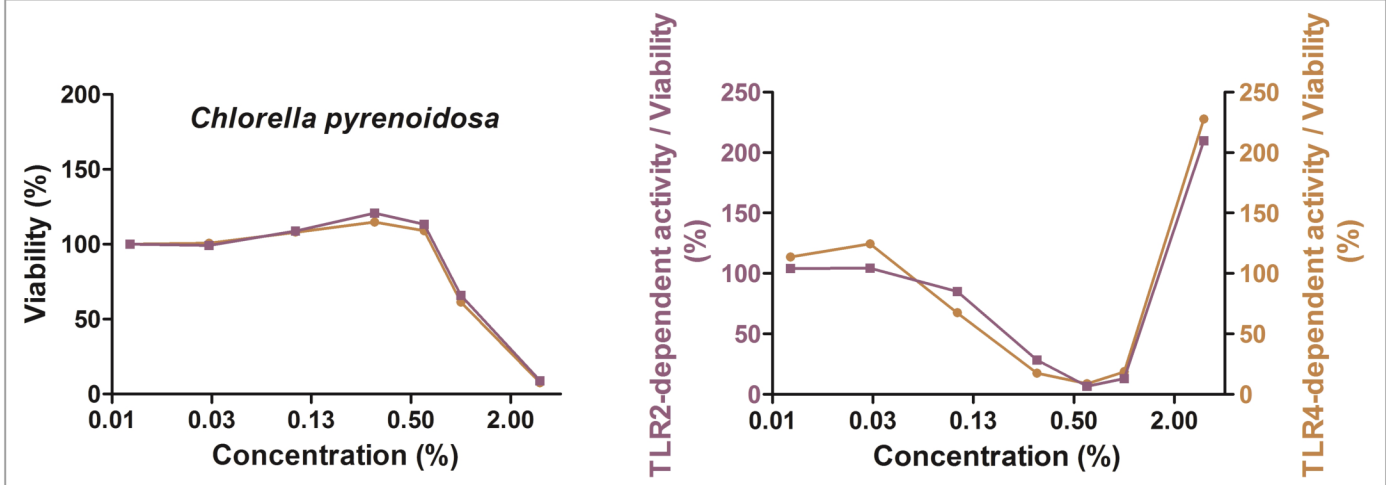

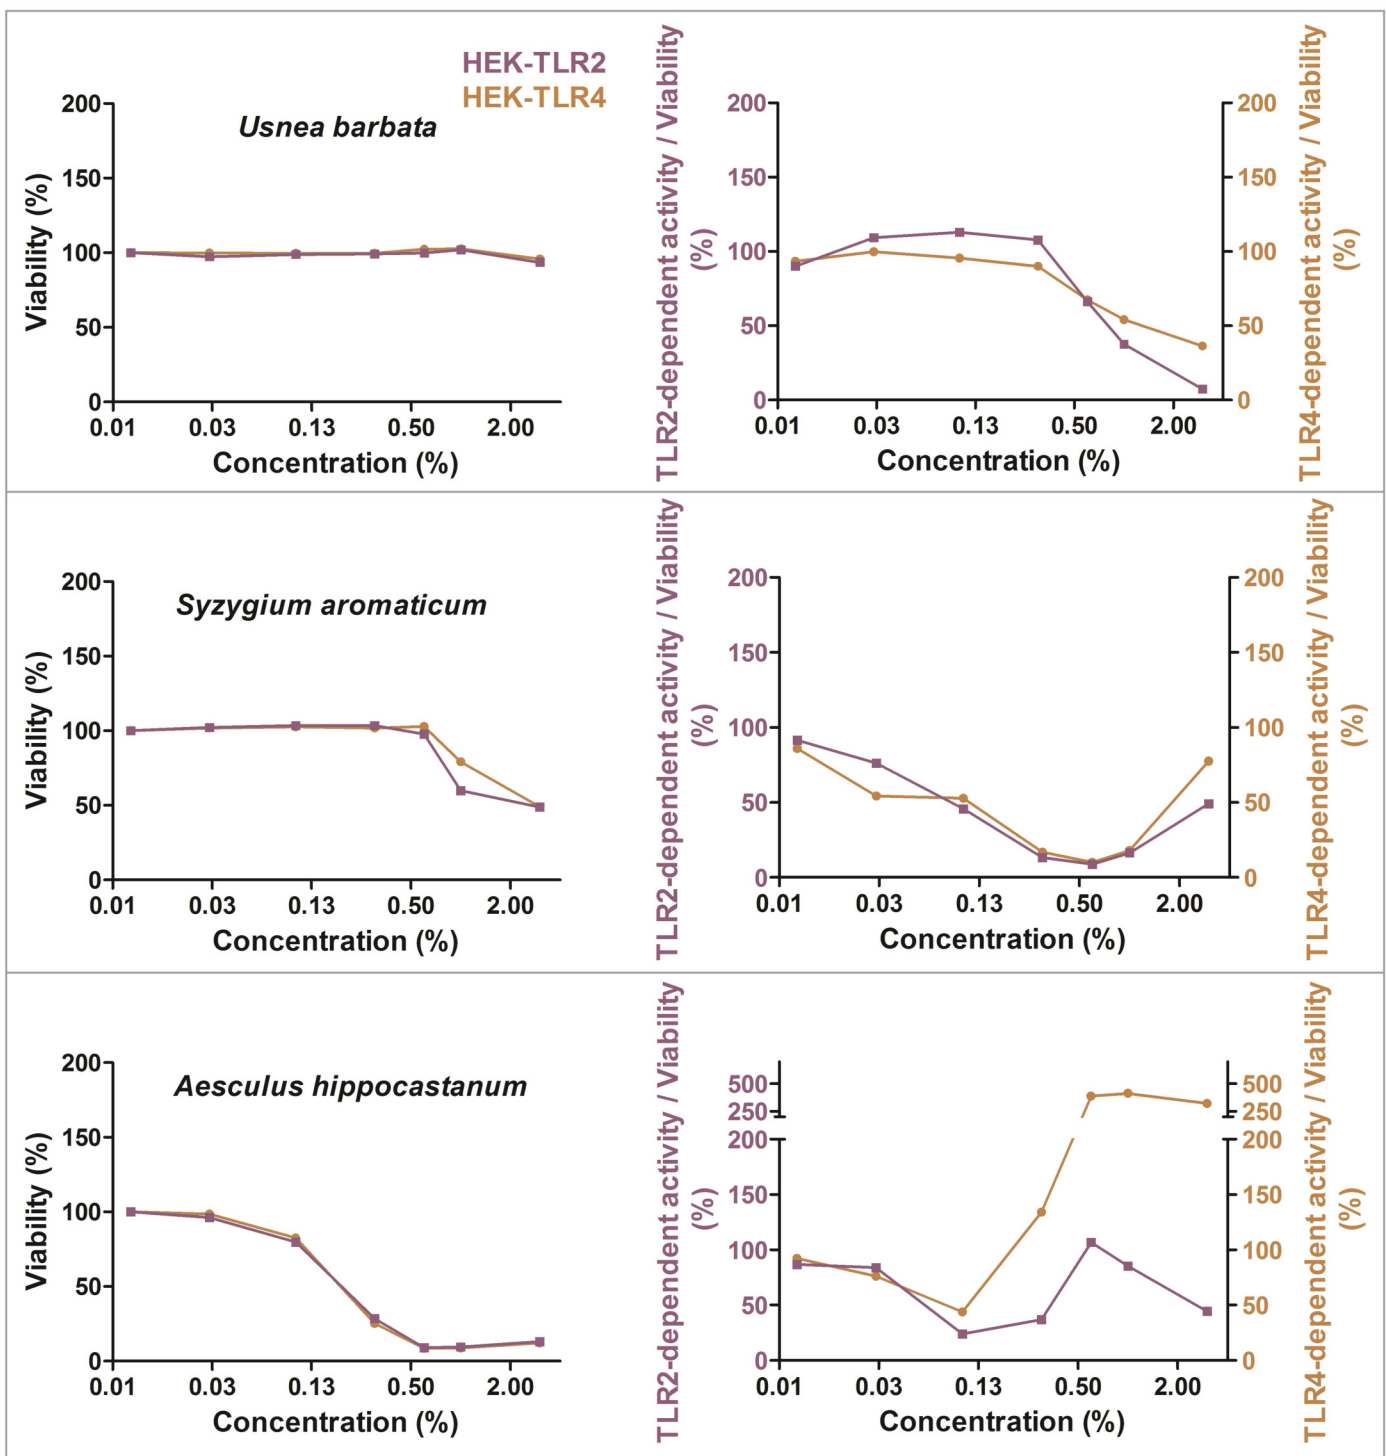

Supplement: pone.0203907.s004.pdf [file pone.0203907.s004.pdf]
