# Supplementary material for: Screening of herbal extracts for TLR2- and TLR4-dependent anti-inflammatory effects
Source: PubMed Central journal article supplement (PMC6181297; doi:10.1371/journal.pone.0203907), 2018-10-11
Supplement: pone.0203907.s005.pdf [file pone.0203907.s005.pdf]

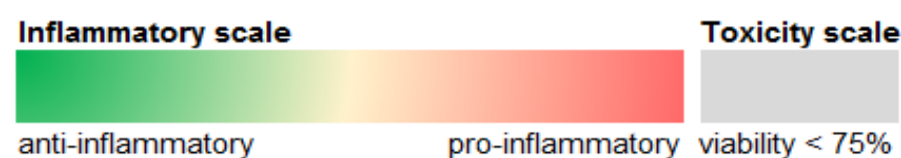

| Latin name                     | Common English name | Used part           | HEK-TLR2 reporter cell line |        |        |        |        |        |         | HEK-TLR4 reporter cell line |        |        |        |        |        |         |
|--------------------------------|---------------------|---------------------|-----------------------------|--------|--------|--------|--------|--------|---------|-----------------------------|--------|--------|--------|--------|--------|---------|
|                                |                     |                     | 0.01%                       | 0.03%  | 0.1%   | 0.3%   | 0.6%   | 1%     | 3%      | 0.01%                       | 0.03%  | 0.1%   | 0.3%   | 0.6%   | 1%     | 3%      |
| Ethanol control                |                     |                     | 100,00                      | 102,45 | 101,84 | 101,03 | 102,55 | 103,43 | 124,76  | 100,00                      | 106,70 | 106,82 | 105,37 | 103,93 | 107,97 | 127,11  |
| <i>Castanea sativa</i>         | Sweet chestnut      | Leaf                | 20,06                       | 17,83  | 9,78   | 11,82  | 19,94  | 28,56  | 118,82  | 24,28                       | 17,36  | 12,78  | 15,09  | 20,87  | 32,77  | 161,75  |
| <i>Cinchona pubescens</i>      | Cinchona            | Bark                | 100,53                      | 94,50  | 77,03  | 65,89  | 25,61  | 13,17  | 22,78   | 96,97                       | 92,46  | 86,34  | 75,11  | 48,95  | 37,82  | 32,81   |
| <i>Cinnamomum verum</i>        | Cinnamon            | Bark                | 100,40                      | 100,11 | 105,47 | 65,88  | 36,23  | 22,34  | 37,65   | 100,75                      | 97,62  | 94,69  | 59,98  | 27,50  | 18,82  | 32,43   |
| <i>Salix alba</i>              | White willow        | Bark                | 102,12                      | 100,18 | 85,03  | 42,14  | 20,67  | 17,65  | 73,17   | 100,01                      | 85,03  | 67,85  | 40,08  | 34,16  | 24,12  | 52,75   |
| <i>Rheum palmatum</i>          | Rhubarb             | Root                | 96,48                       | 87,24  | 59,40  | 36,53  | 13,11  | 8,17   | 24,68   | 89,65                       | 89,52  | 64,85  | 40,62  | 20,74  | 16,27  | 38,65   |
| <i>Humulus lupulus</i>         | Hops                | Flower              | 90,21                       | 90,80  | 45,52  | 6,84   | 7,25   | 12,55  | 88,75   | 99,42                       | 104,49 | 56,15  | 18,10  | 13,97  | 15,99  | 105,06  |
| <i>Arctostaphylos uva-ursi</i> | Bearberry           | Leaf                | 91,42                       | 71,09  | 20,16  | 11,86  | 25,75  | 41,19  | 385,83  | 101,93                      | 96,18  | 91,06  | 77,63  | 36,71  | 24,40  | 217,02  |
| <i>Allium ursinum</i>          | Wild garlic         | Leaf                | 95,05                       | 117,18 | 104,97 | 110,95 | 85,31  | 45,41  | 8,55    | 92,64                       | 101,32 | 83,11  | 79,90  | 53,77  | 32,22  | 13,36   |
| <i>Hypericum perforatum</i>    | St John's wort      | Whole plant         | 100,82                      | 92,09  | 94,08  | 89,60  | 48,53  | 29,53  | 6,00    | 101,20                      | 125,93 | 115,86 | 99,00  | 72,14  | 41,77  | 12,66   |
| <i>Aloe ferox</i>              | Aloe                | Whole plant         | 99,50                       | 94,02  | 95,36  | 76,96  | 56,33  | 45,12  | 158,90  | 95,70                       | 105,77 | 87,57  | 62,60  | 40,30  | 32,00  | 208,70  |
| <i>Cynara scolymus</i>         | Artichoke           | Leaf                | 104,96                      | 99,81  | 95,14  | 60,38  | 11,43  | 7,45   | 9,75    | 102,92                      | 109,70 | 99,86  | 71,37  | 37,63  | 25,76  | 19,01   |
| <i>Salvia officinalis</i>      | Salvia              | Leaf                | 79,45                       | 87,83  | 73,41  | 38,26  | 9,48   | 5,77   | 25,80   | 100,28                      | 103,61 | 65,58  | 34,90  | 14,99  | 9,98   | 19,63   |
| <i>Ginkgo biloba</i>           | Ginkgo              | Leaf                | 83,06                       | 80,39  | 74,11  | 30,88  | 4,92   | 4,06   | 7,87    | 100,24                      | 107,01 | 81,26  | 42,13  | 21,39  | 14,24  | 14,18   |
| <i>Vigna radiata</i>           | Mung bean (dried)   | Fruit/berry/seed    | 86,58                       | 110,71 | 78,43  | 91,74  | 84,41  | 65,29  | 30,75   | 77,04                       | 94,29  | 88,78  | 86,30  | 76,44  | 74,46  | 59,49   |
| <i>Filipendula ulmaria</i>     | Meadowsweet         | Flower              | 75,12                       | 63,58  | 51,28  | 40,60  | 30,35  | 18,59  | 15,08   | 101,71                      | 111,43 | 107,58 | 103,43 | 102,99 | 101,11 | 94,91   |
| <i>Spirulina</i>               | Spirulina           | Whole cyanobacteria | 116,49                      | 139,54 | 127,71 | 129,36 | 67,85  | 15,01  | 28,28   | 99,69                       | 110,62 | 69,12  | 40,91  | 16,95  | 12,20  | 38,50   |
| <i>Gentiana lutea</i>          | Gentian             | Root                | 96,77                       | 103,65 | 99,90  | 113,40 | 83,38  | 59,14  | 5,82    | 108,21                      | 129,60 | 117,81 | 107,54 | 77,28  | 60,19  | 18,10   |
| <i>Quercus robur</i>           | English oak         | Bark                | 93,72                       | 113,22 | 81,11  | 42,60  | 15,04  | 7,52   | 16,84   | 89,53                       | 70,65  | 63,23  | 38,30  | 18,82  | 12,82  | 24,23   |
| <i>Glycyrrhiza glabra</i>      | Liquorice           | Root                | 78,30                       | 44,63  | 5,56   | 12,09  | 28,06  | 37,27  | 101,27  | 83,64                       | 60,59  | 32,18  | 33,77  | 70,66  | 67,87  | 162,46  |
| <i>Zingiber officinale</i>     | Ginger              | Root                | 89,51                       | 75,69  | 74,77  | 35,53  | 4,69   | 5,18   | 35,84   | 103,89                      | 120,85 | 95,36  | 77,68  | 26,45  | 25,34  | 223,46  |
| <i>Boswellia serrata</i>       | Frankincense        | Juice/resin         | 82,46                       | 38,96  | 19,81  | 17,73  | 159,07 | 432,24 | 2076,63 | 78,29                       | 54,43  | 40,86  | 45,48  | 288,07 | 744,11 | 2813,02 |
| <i>Alpinia officinarum</i>     | Galangal            | Root                | 71,36                       | 68,16  | 57,03  | 21,85  | 8,95   | 6,85   | 29,83   | 100,45                      | 105,34 | 99,27  | 91,33  | 95,04  | 97,57  | 176,07  |
| <i>Hamamelis virginiana</i>    | Witch hazel         | Leaf                | 68,01                       | 54,73  | 25,63  | 18,14  | 24,82  | 28,25  | 174,32  | 101,02                      | 102,08 | 90,19  | 64,82  | 34,21  | 35,64  | 129,53  |
| <i>Chlorella pyrenoidosa</i>   | Chlorella           | Whole algae         | 103,97                      | 104,34 | 84,84  | 28,14  | 6,63   | 12,96  | 209,74  | 113,66                      | 124,42 | 67,31  | 17,39  | 8,74   | 18,75  | 227,74  |
| <i>Usnea barbata</i>           | Barber's itch       | Whole plant         | 90,08                       | 109,48 | 113,03 | 107,82 | 66,29  | 37,56  | 7,49    | 93,50                       | 99,92  | 95,64  | 90,15  | 67,63  | 54,02  | 36,36   |
| <i>Syzygium aromaticum</i>     | Clove               | Flower              | 91,40                       | 76,21  | 45,89  | 13,37  | 8,91   | 16,47  | 49,18   | 86,11                       | 54,39  | 52,82  | 16,99  | 10,06  | 18,12  | 77,65   |
| <i>Aesculus hippocastanum</i>  | Horse-chestnut      | Fruit/berry/seed    | 86,76                       | 83,98  | 24,02  | 36,87  | 106,93 | 85,46  | 44,41   | 92,43                       | 76,26  | 43,91  | 134,14 | 388,13 | 413,57 | 323,76  |
